# Supplementary material for: Definitive evidence of the Mediterranean Outflowheterogeneity. Part 1: at the Strait of Gibraltar entrance
Source: Copernicus journal article supplement (doi:10.5194/os-2017-52), 2017-08-01
Supplement: Supplementary file 1 [file os-2017-52-supplement.pdf]

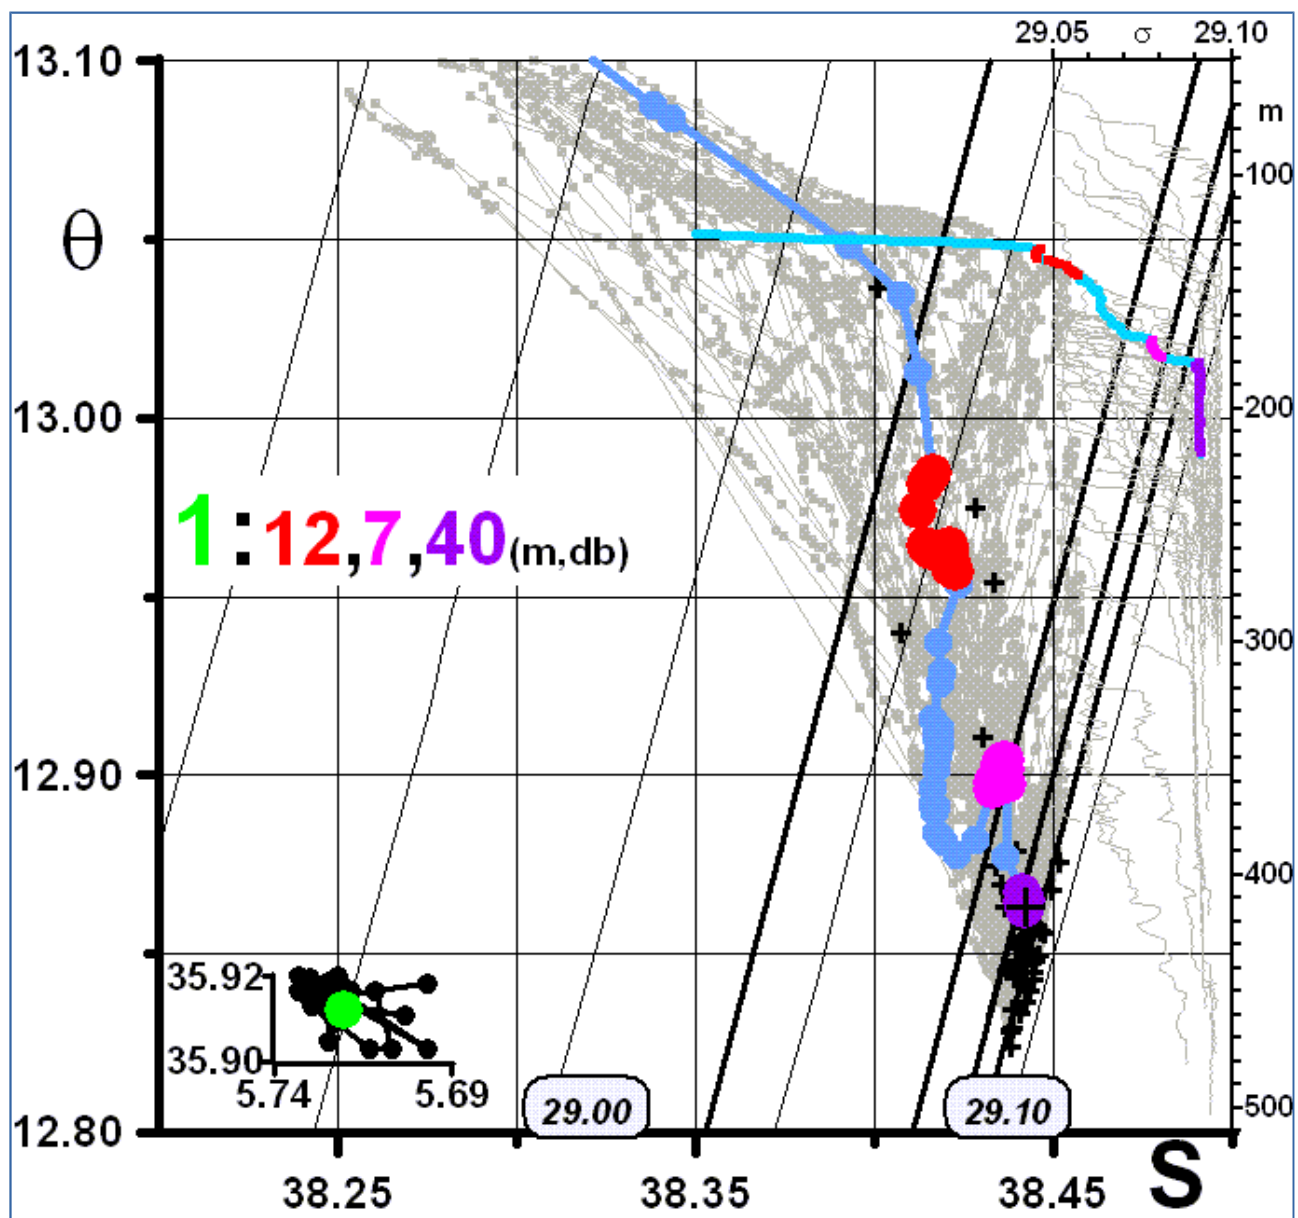

Figure S1. Same as in Fig.6a for profile #1 of the yo-yo time series at 5°43'W.

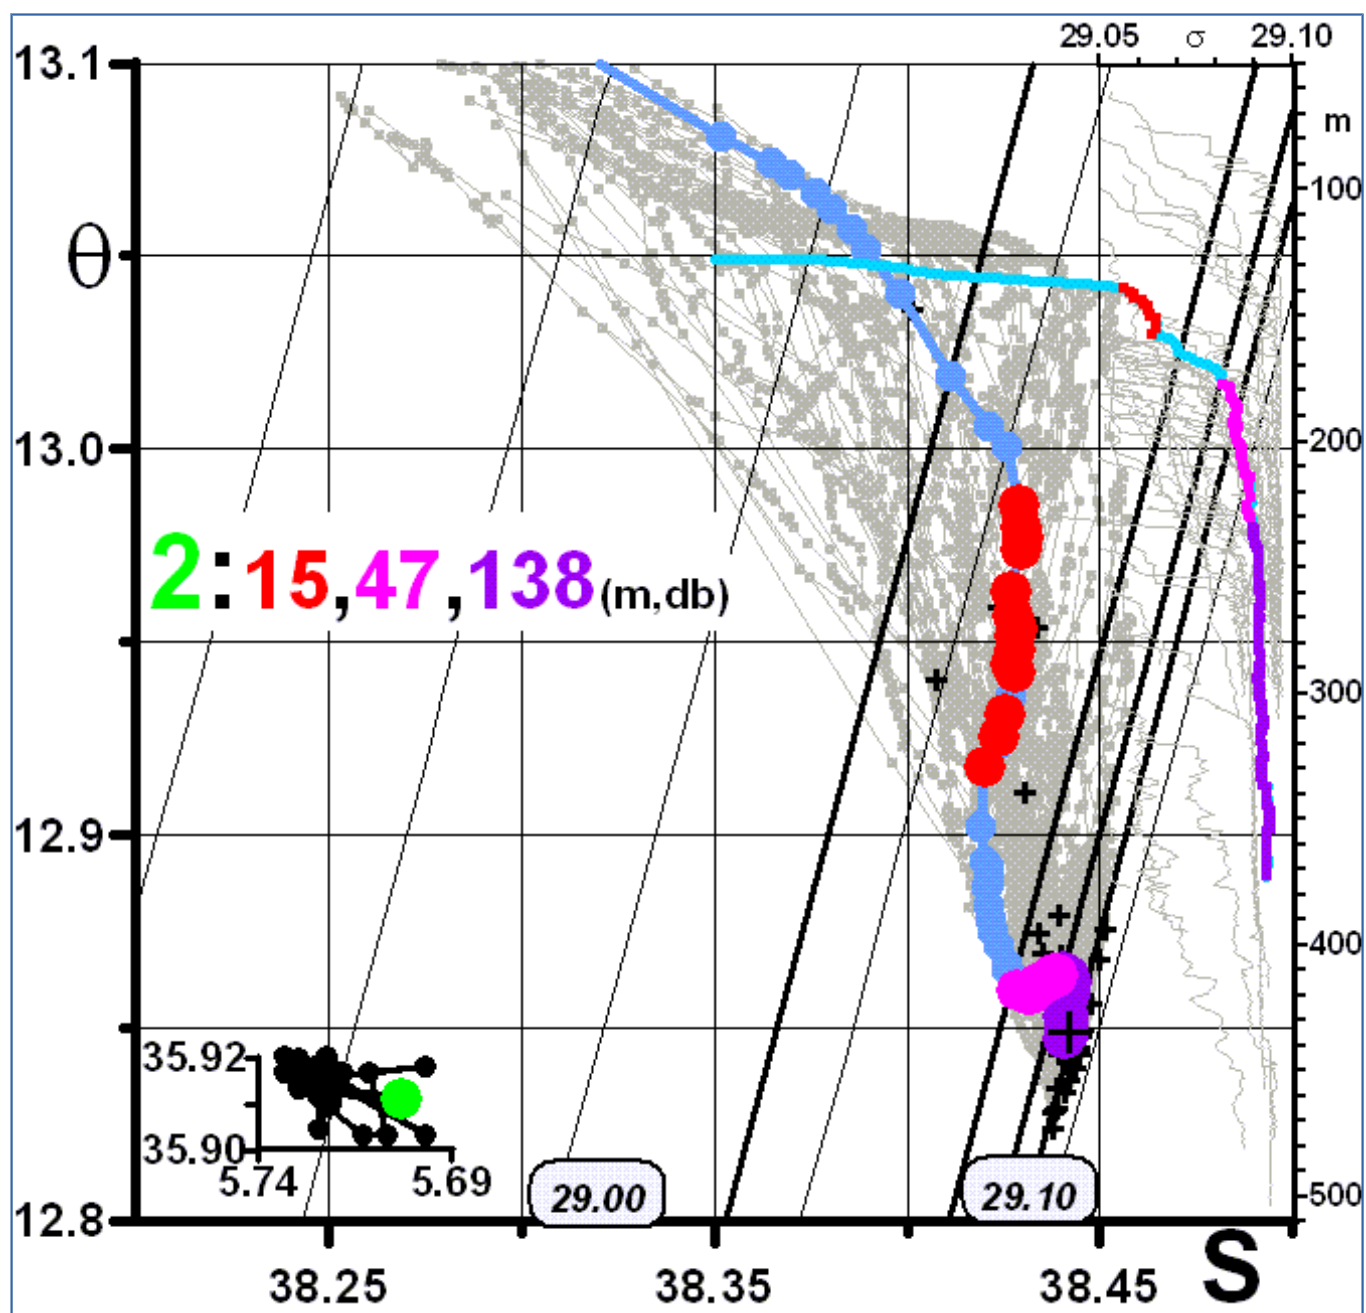

Figure S2. Same as in Fig.6a for profile #2 of the yo-yo time series at 5°43'W.

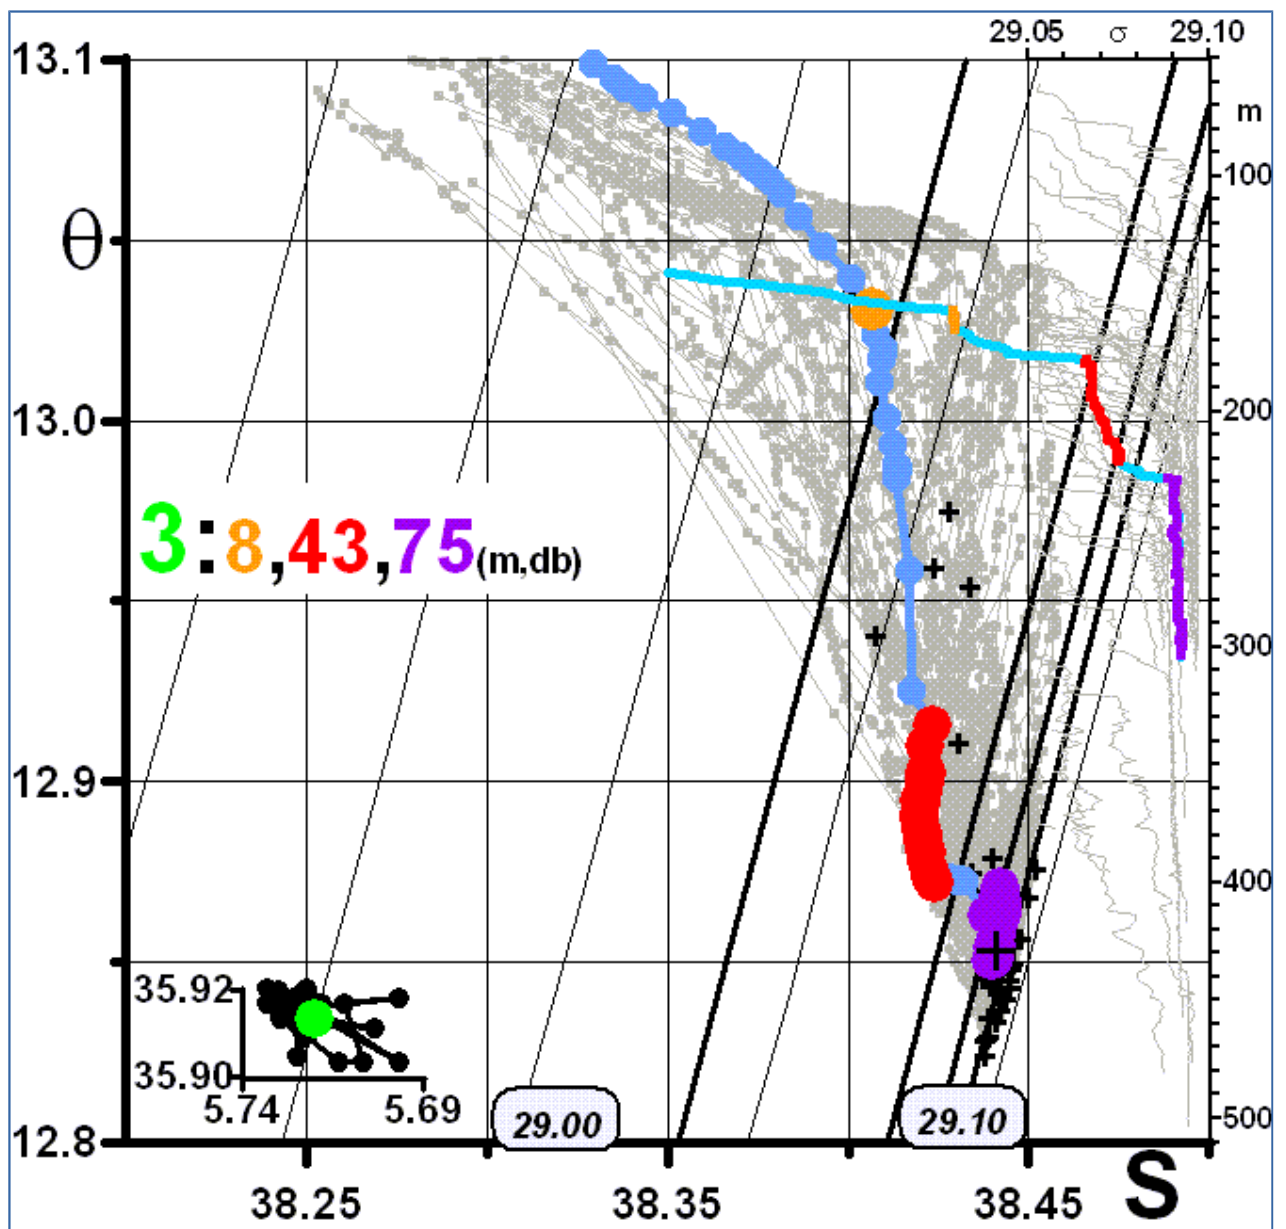

Figure S3. Same as in Fig.6a for profile #3 of the yo-yo time series at 5°43'W.

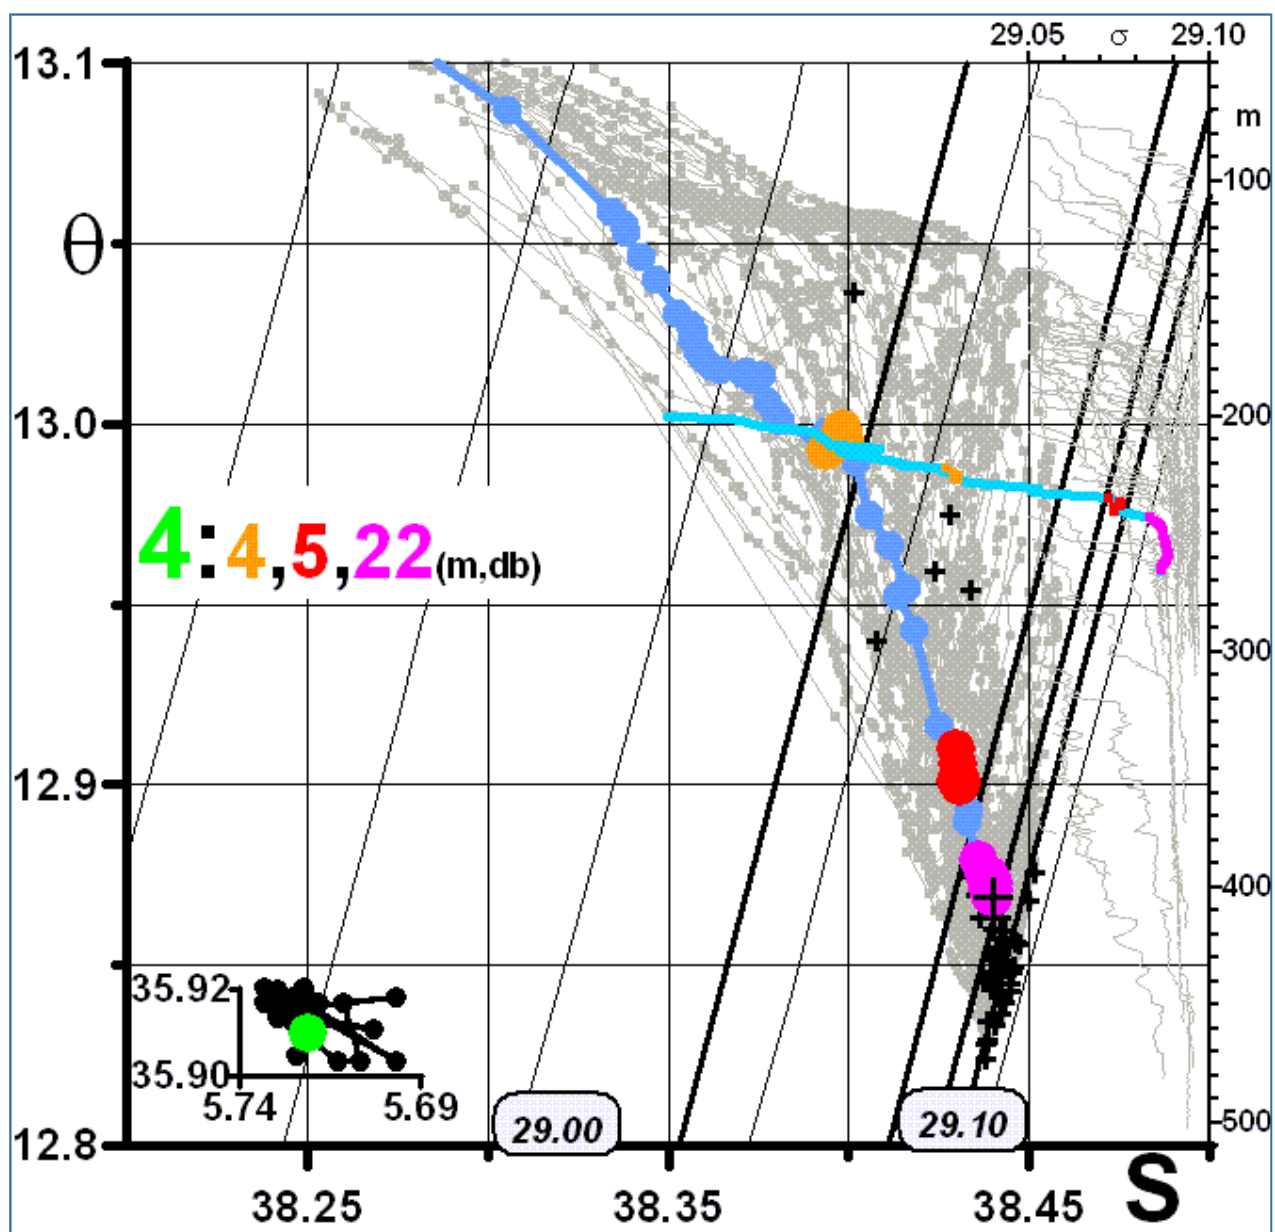

Figure S4. Same as in Fig.6a for profile #4 of the yo-yo time series at 5°43'W.

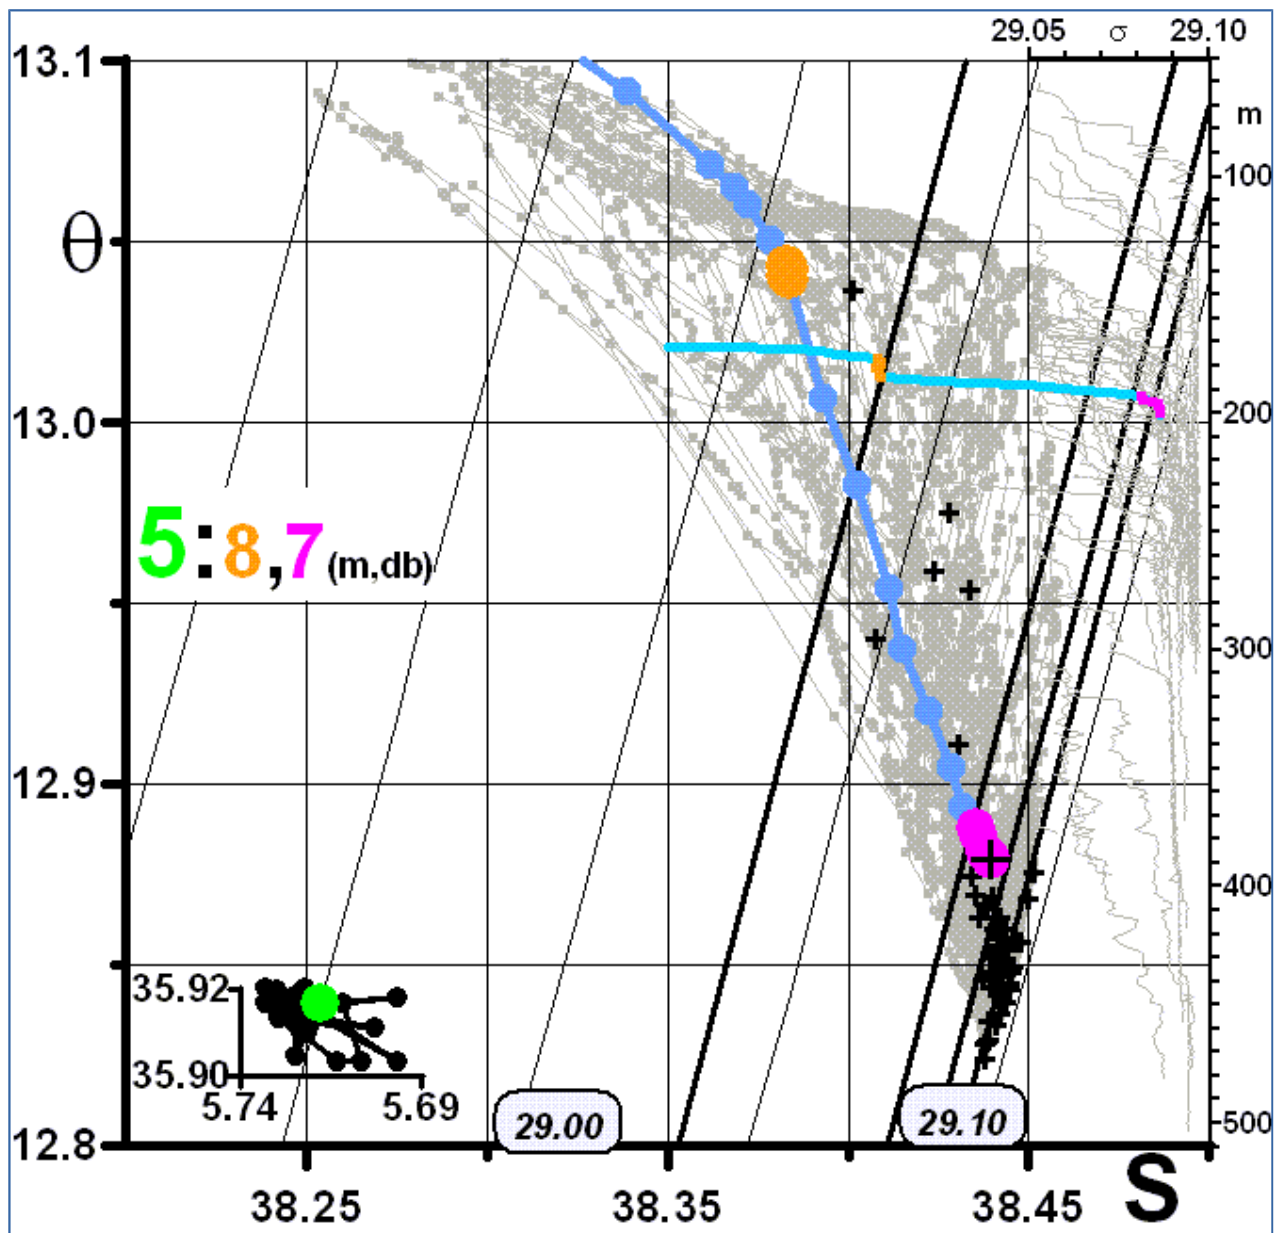

Figure S5. Same as in Fig.6a for profile #5 of the yo-yo time series at 5°43'W.

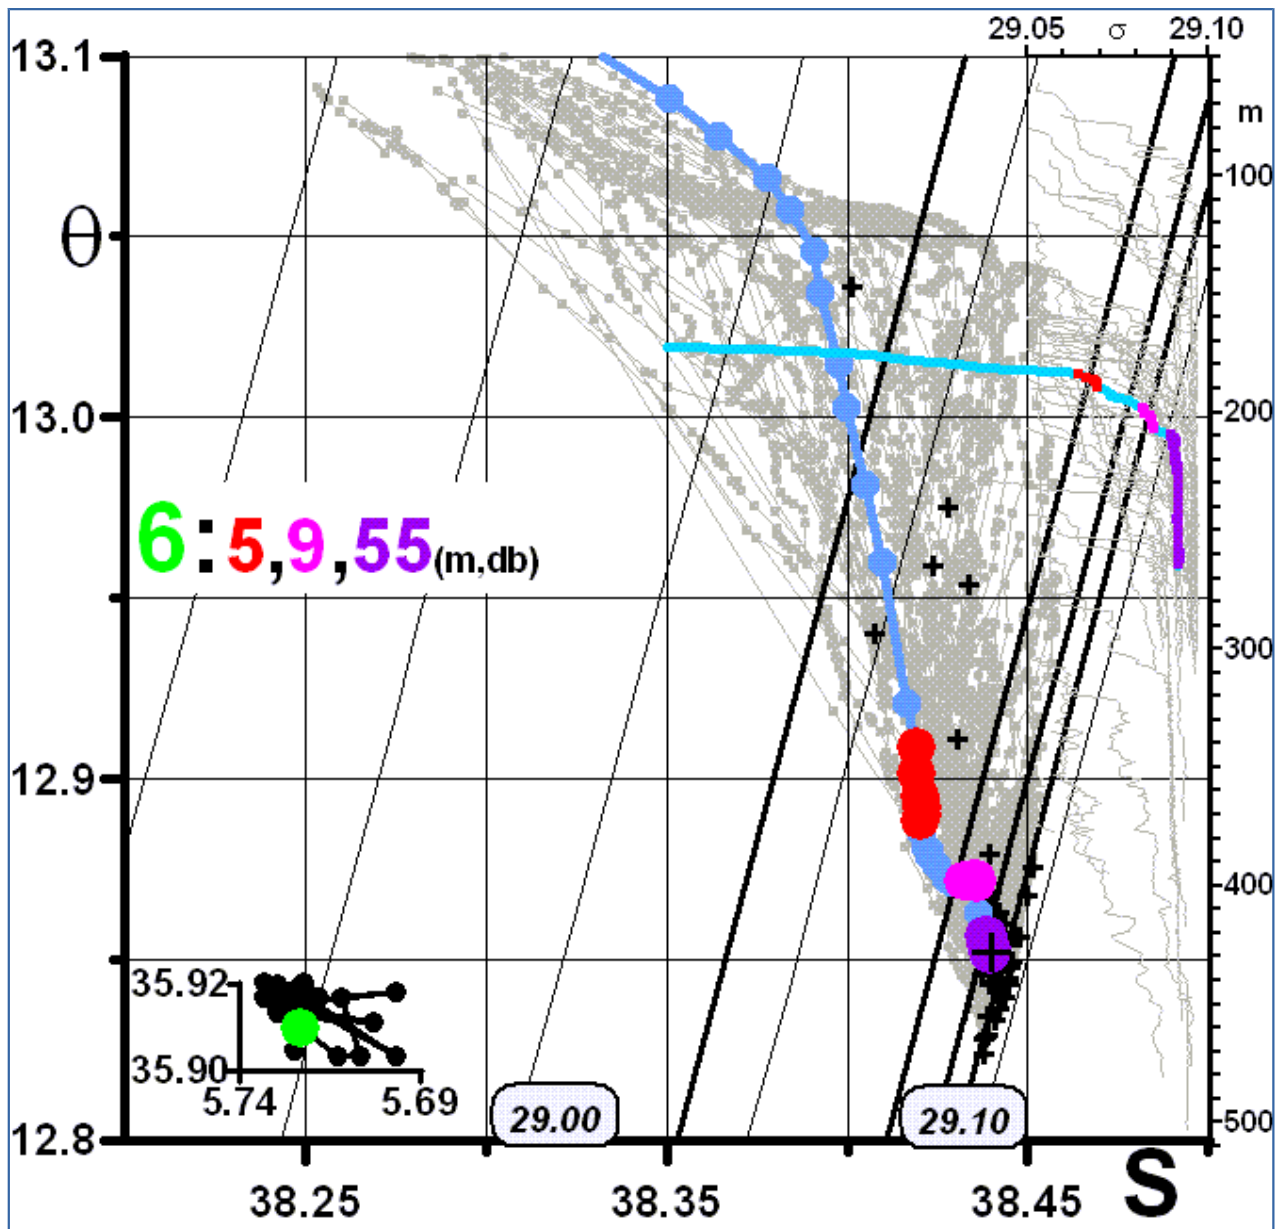

Figure S6. Same as in Fig.6a for profile #6 of the yo-yo time series at 5°43'W.

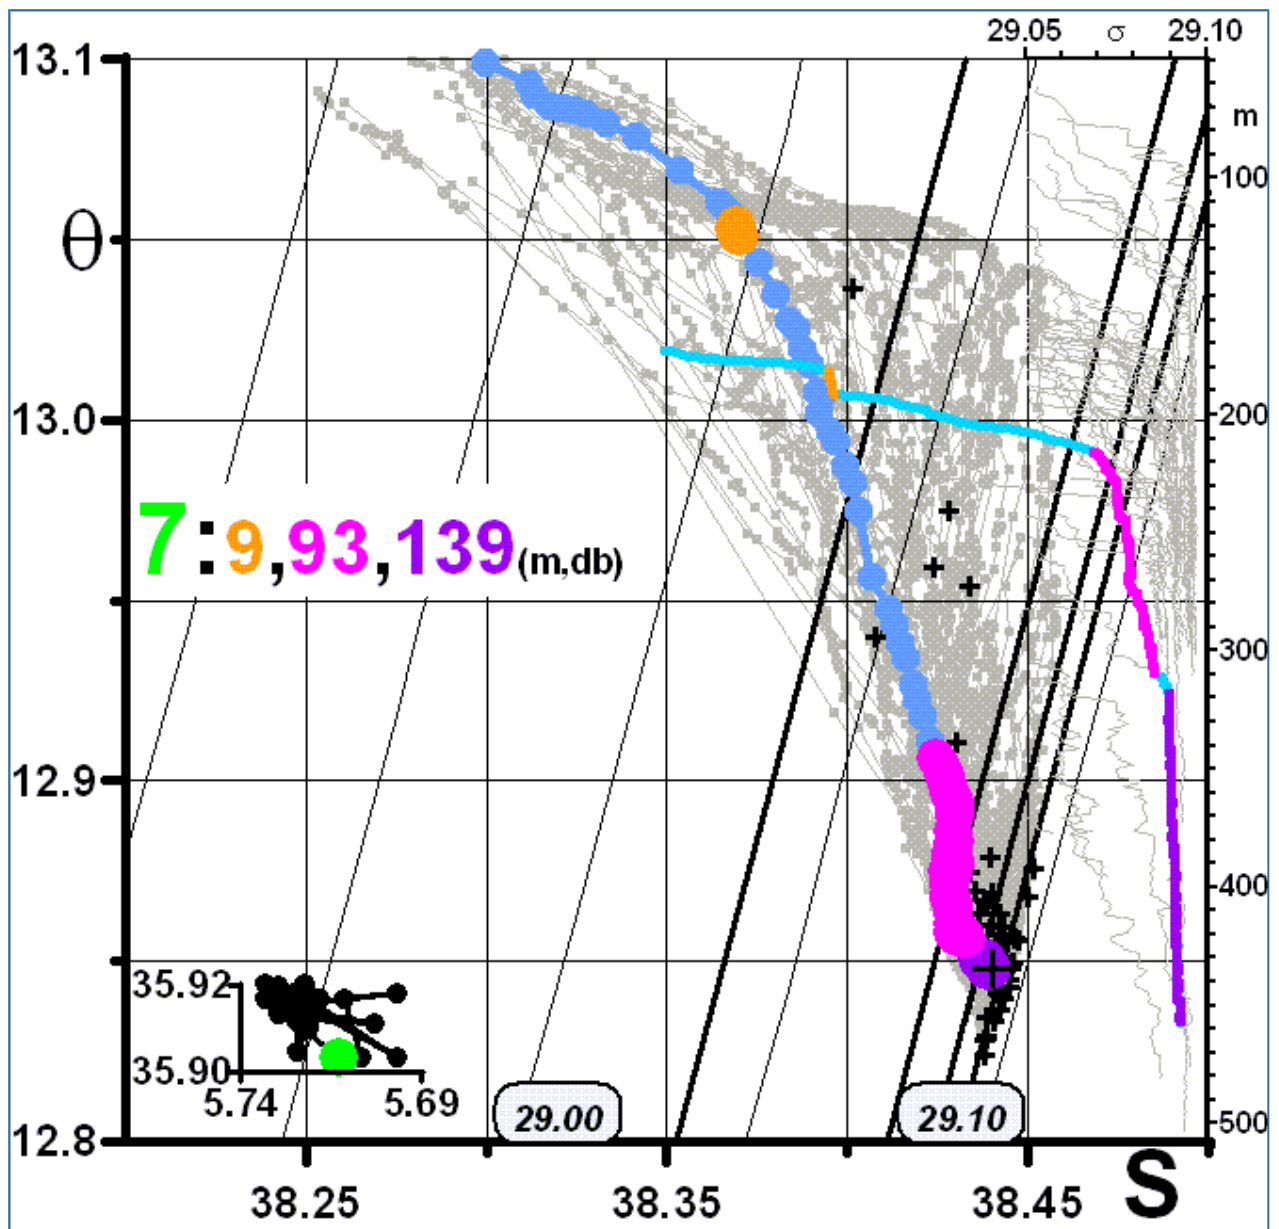

Figure S7. Same as in Fig.6a for profile #7 of the yo-yo time series at 5°43'W.

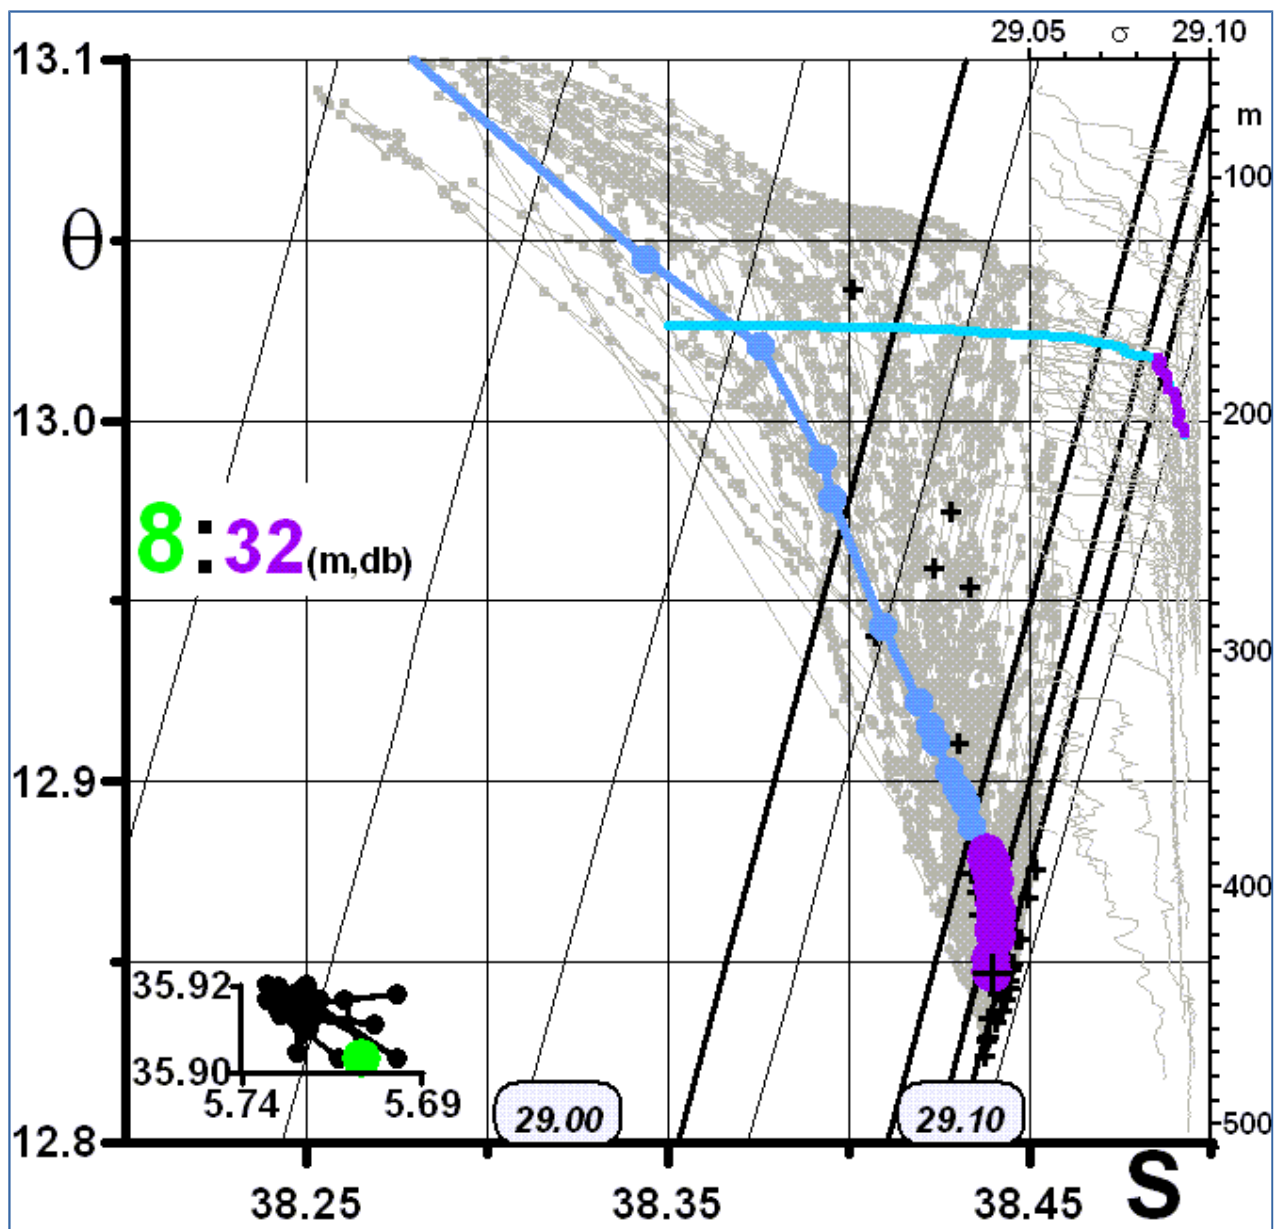

**Figure S8.** Same as in Fig.6a for profile #8 of the yo-yo time series at 5°43'W.



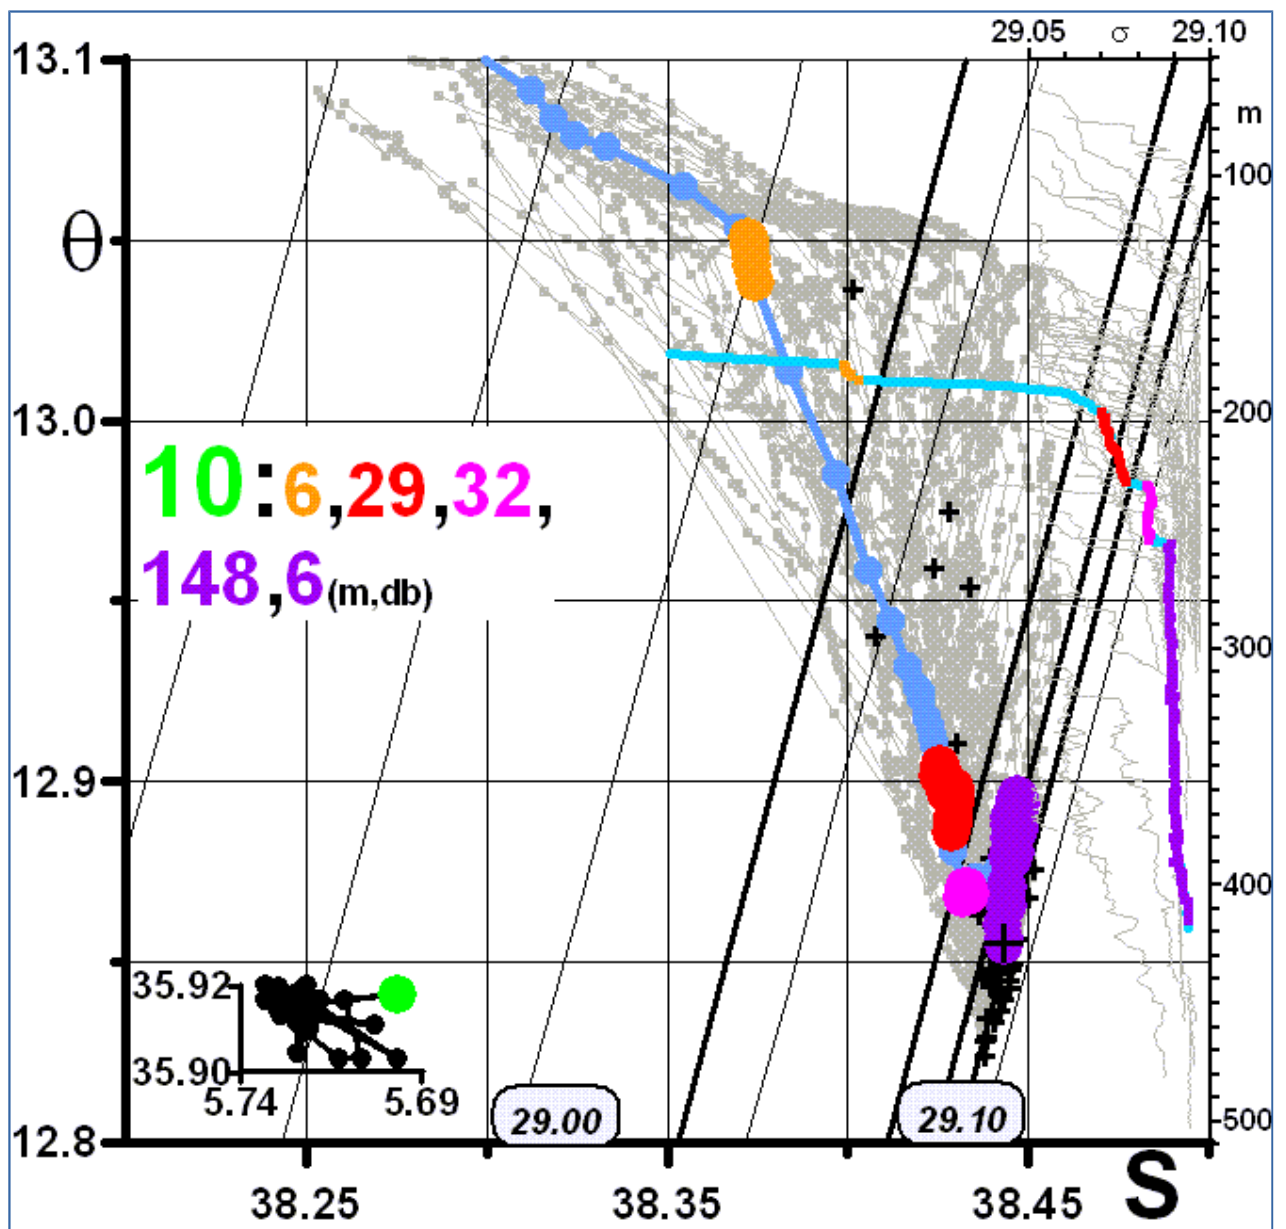

Figure S10. Same as in Fig.6a for profile #10 of the yo-yo time series at  $5^{\circ}43'W$ .

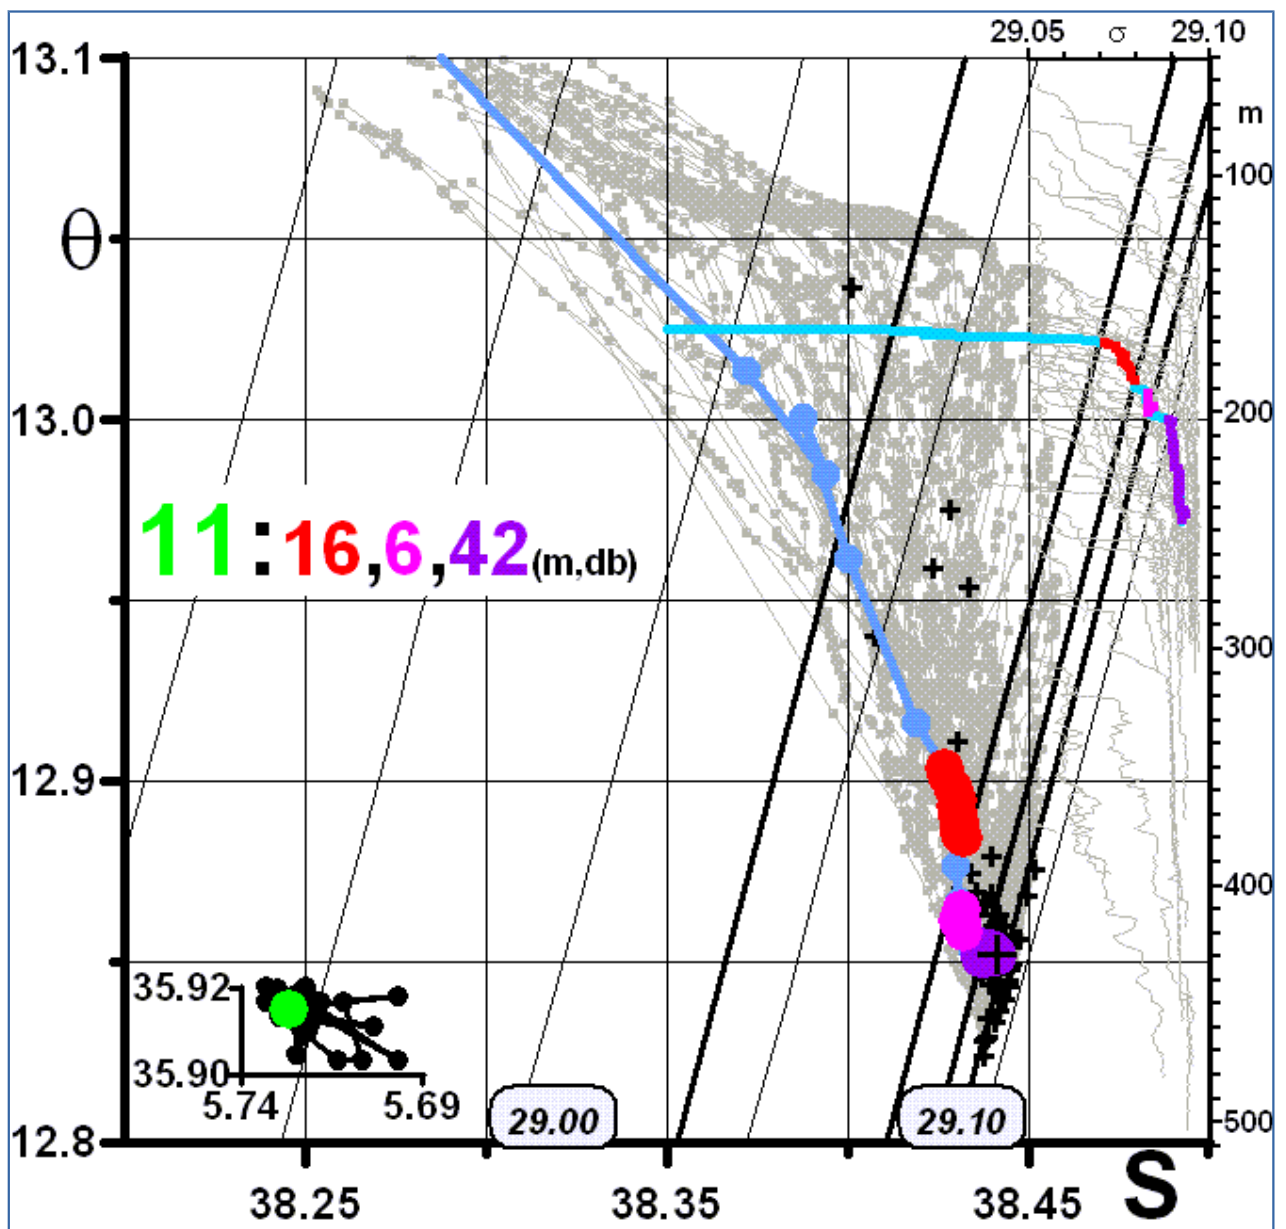

Figure S11. Same as in Fig.6a for profile #11 of the yo-yo time series at 5°43'W.

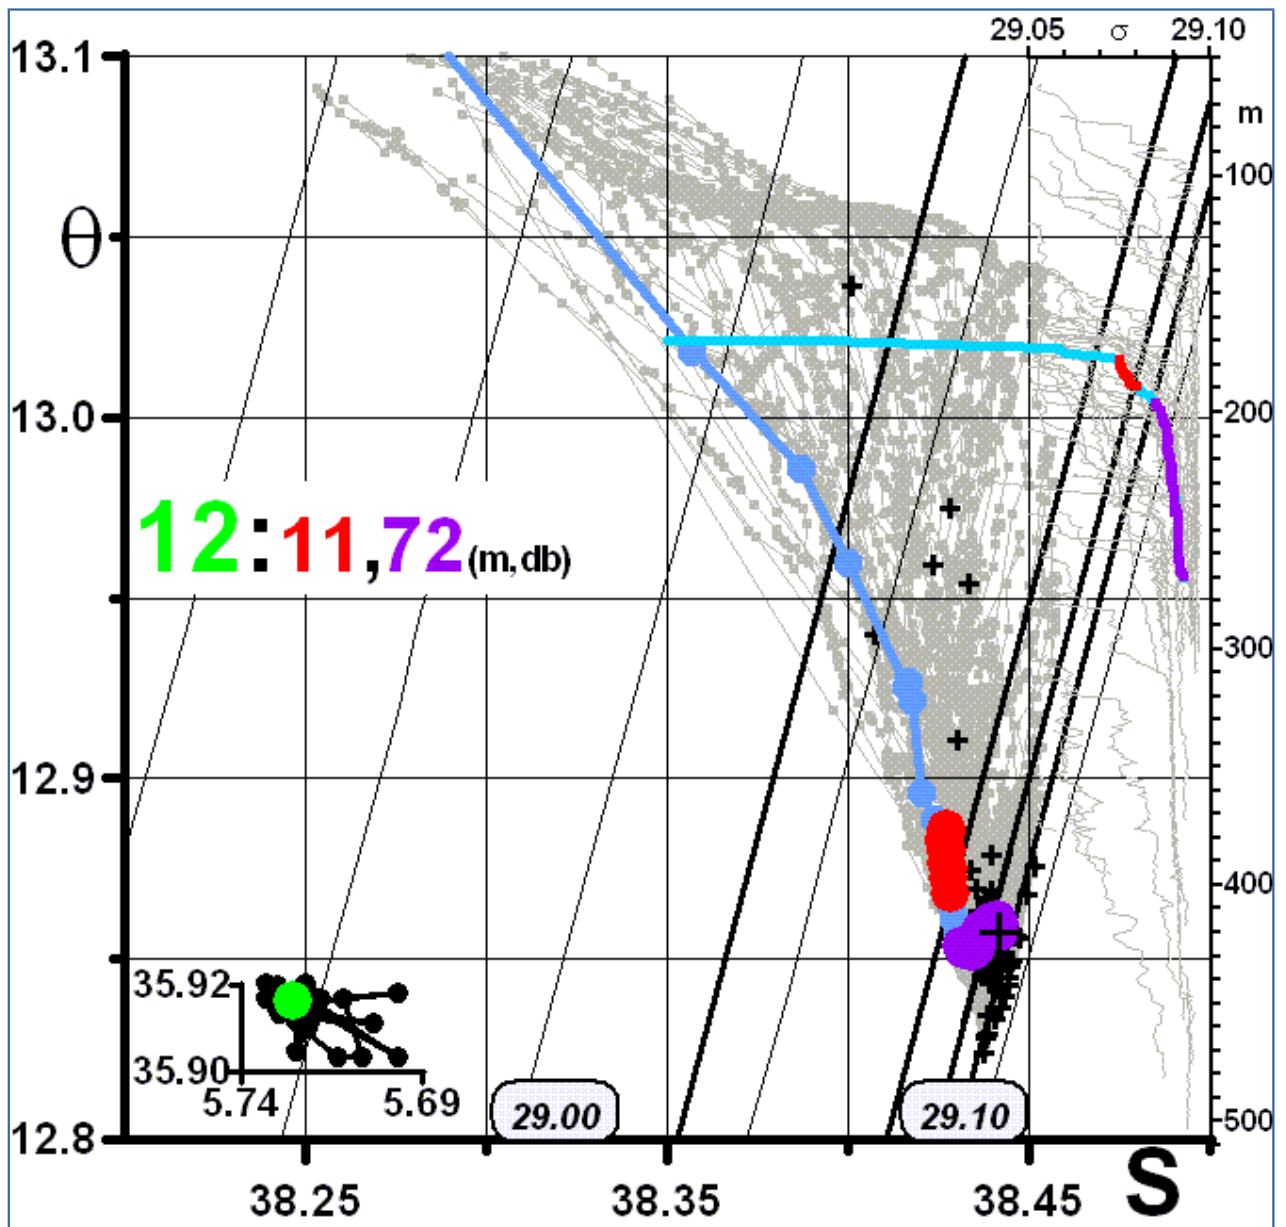

**Figure S12.** Same as in Fig.6a for profile #12 of the yo-yo time series at 5°43'W.

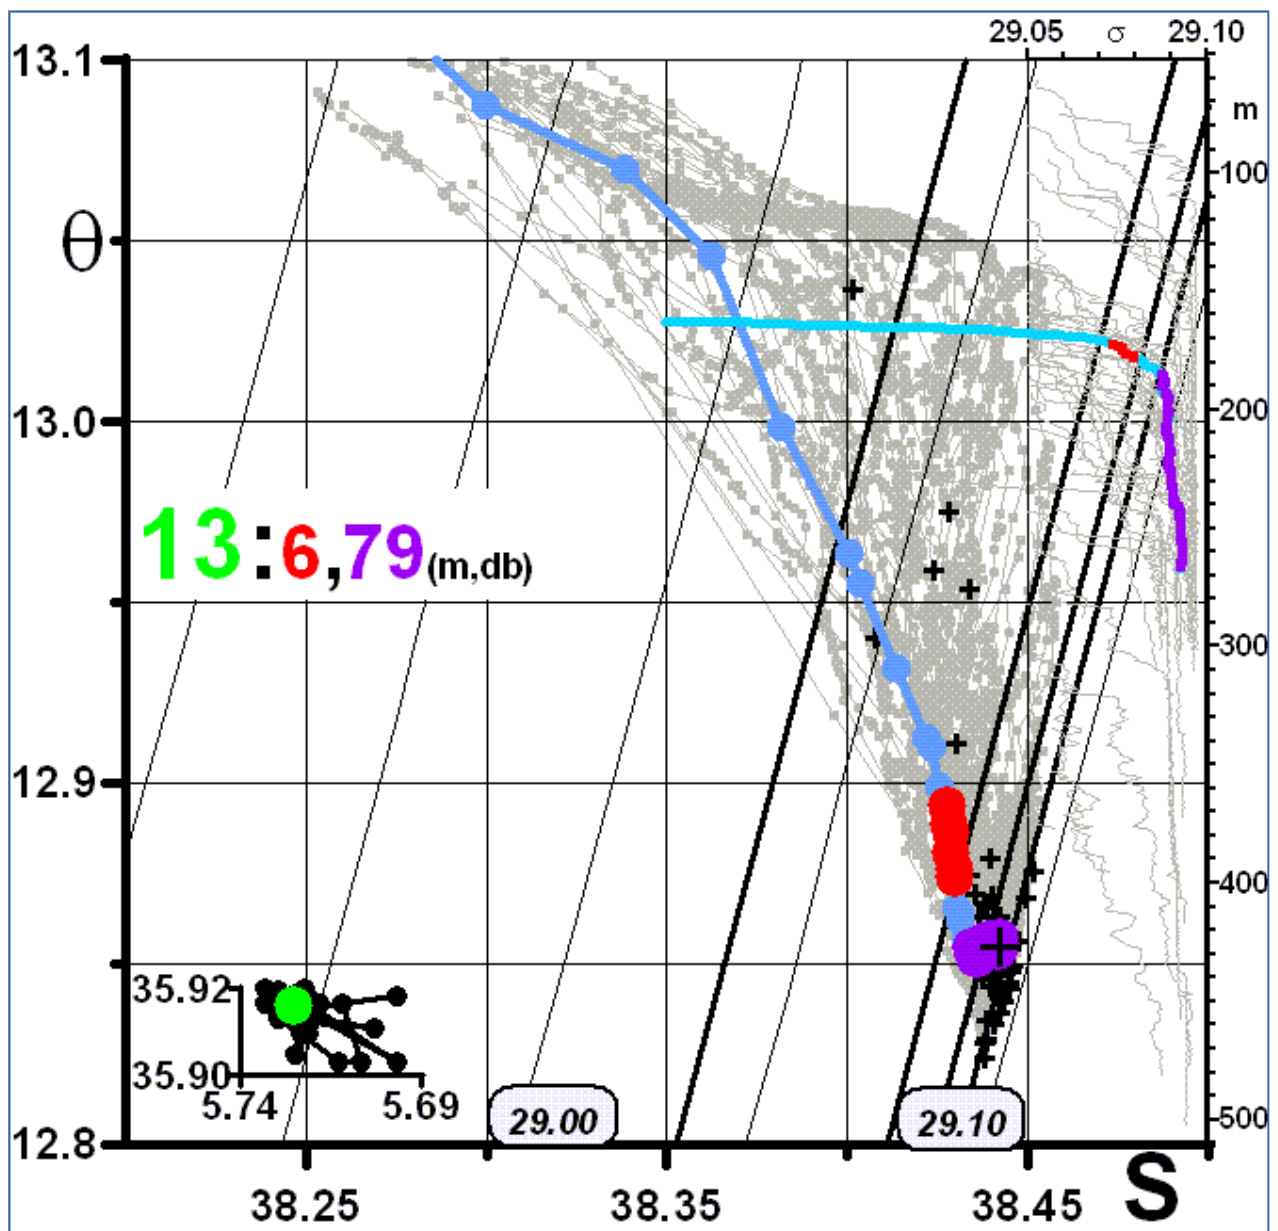

Figure S13. Same as in Fig.6a for profile #13 of the yo-yo time series at 5°43'W.

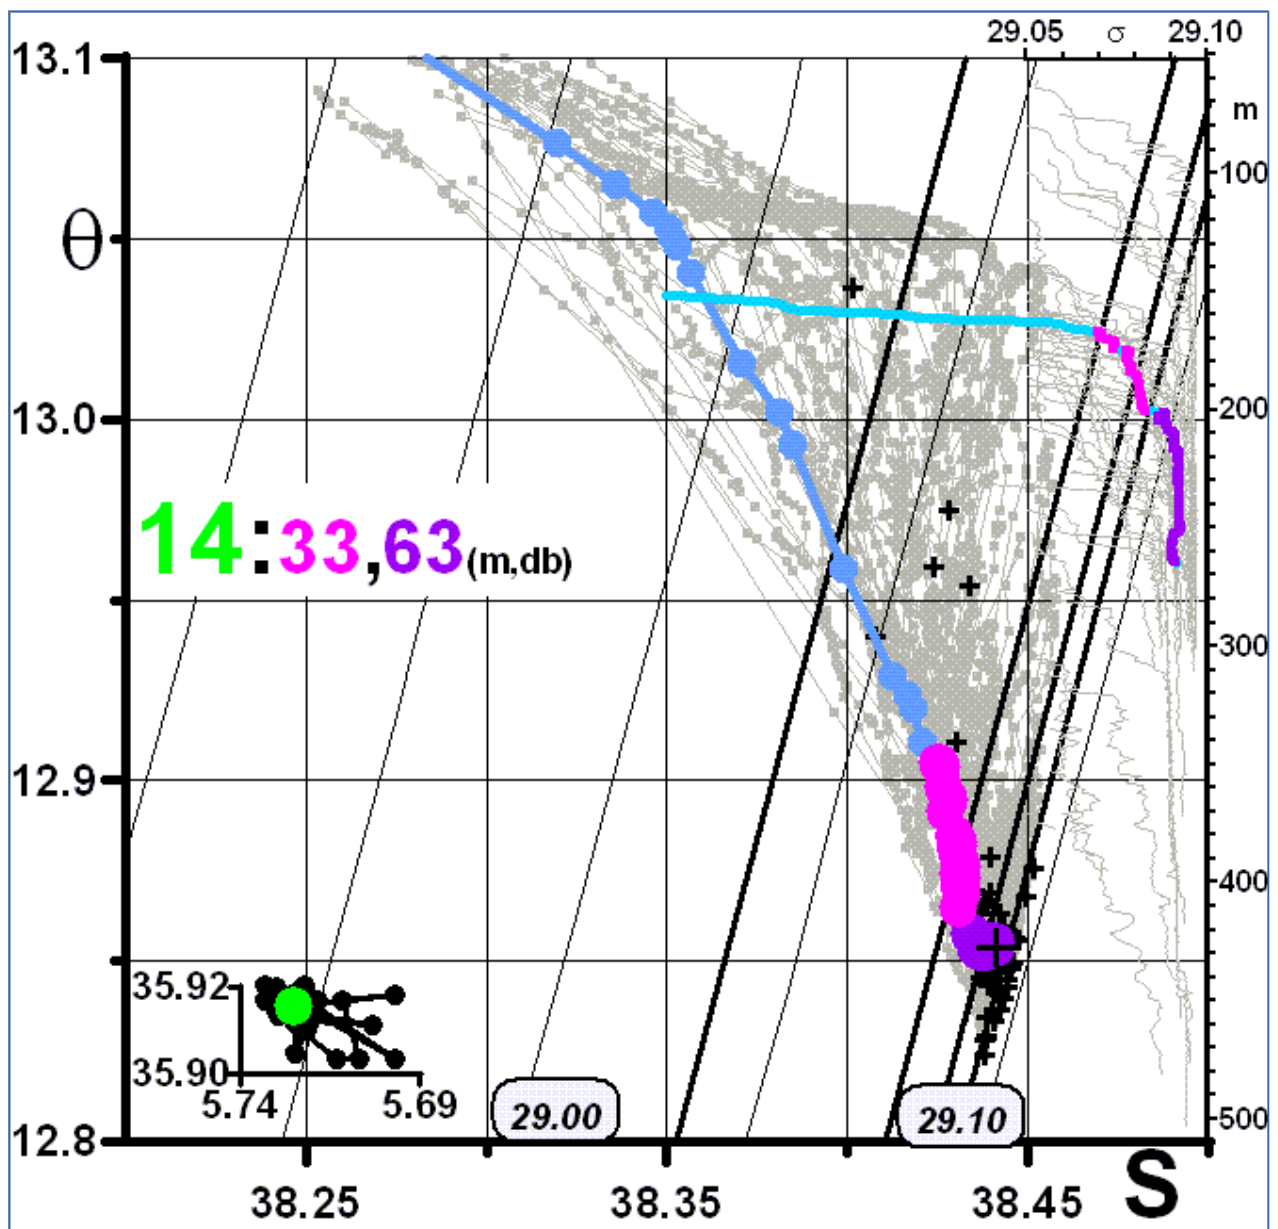

**Figure S14.** Same as in Fig.6a for profile #14 of the yo-yo time series at 5°43'W.

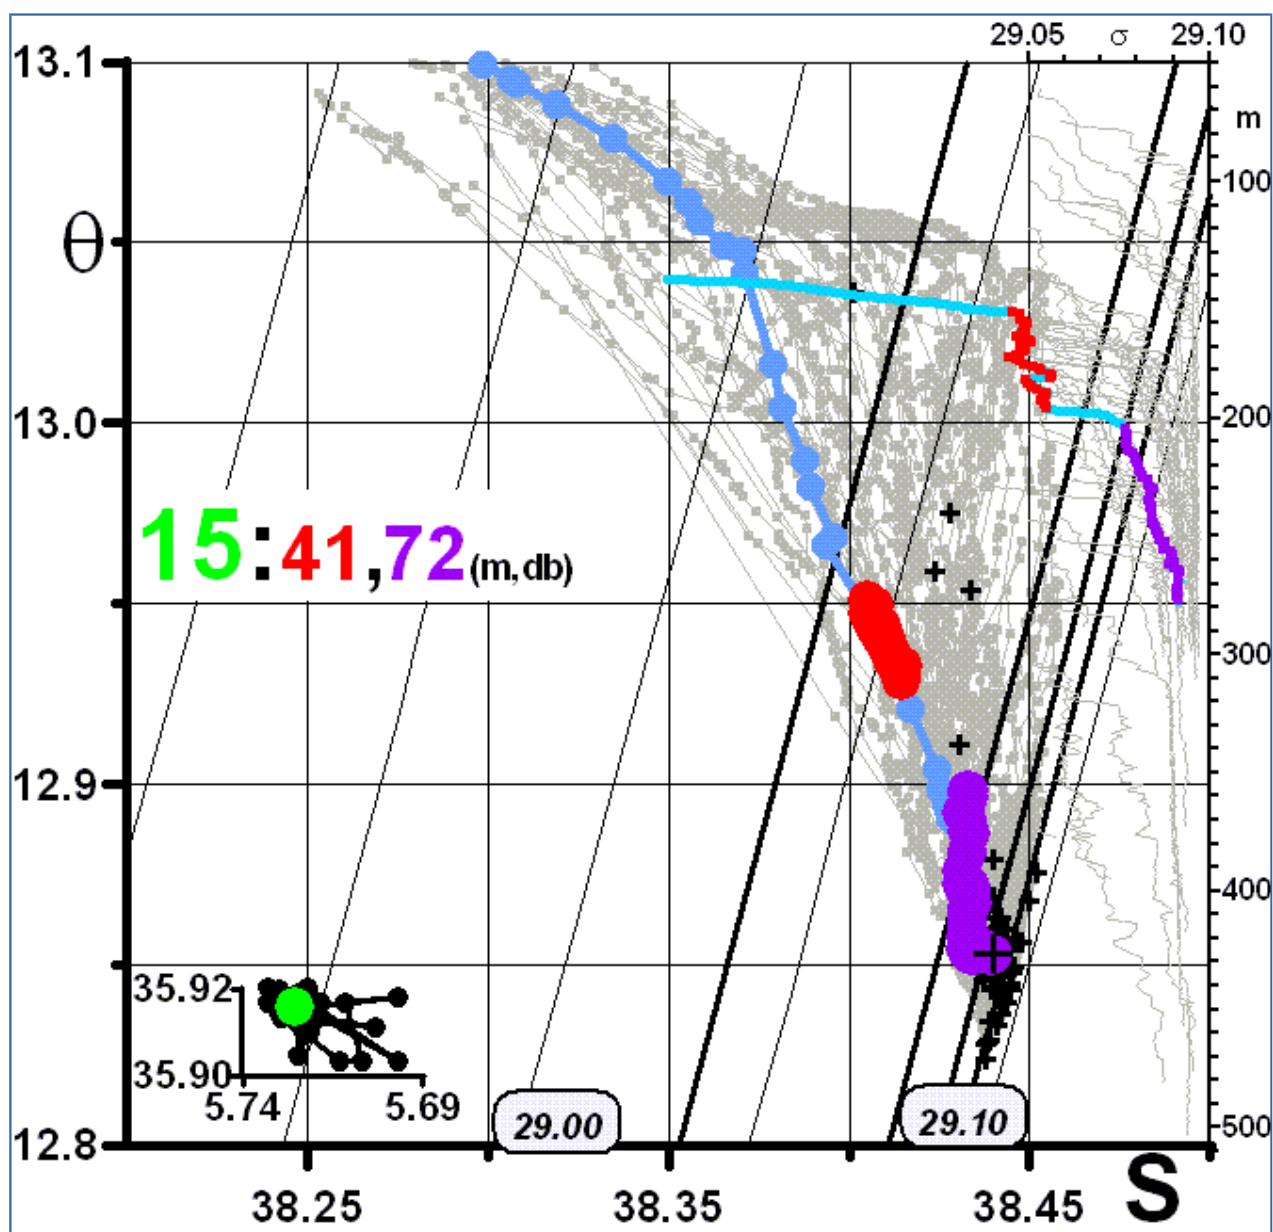

Figure S15. Same as in Fig.6a for profile #15 of the yo-yo time series at 5°43'W.

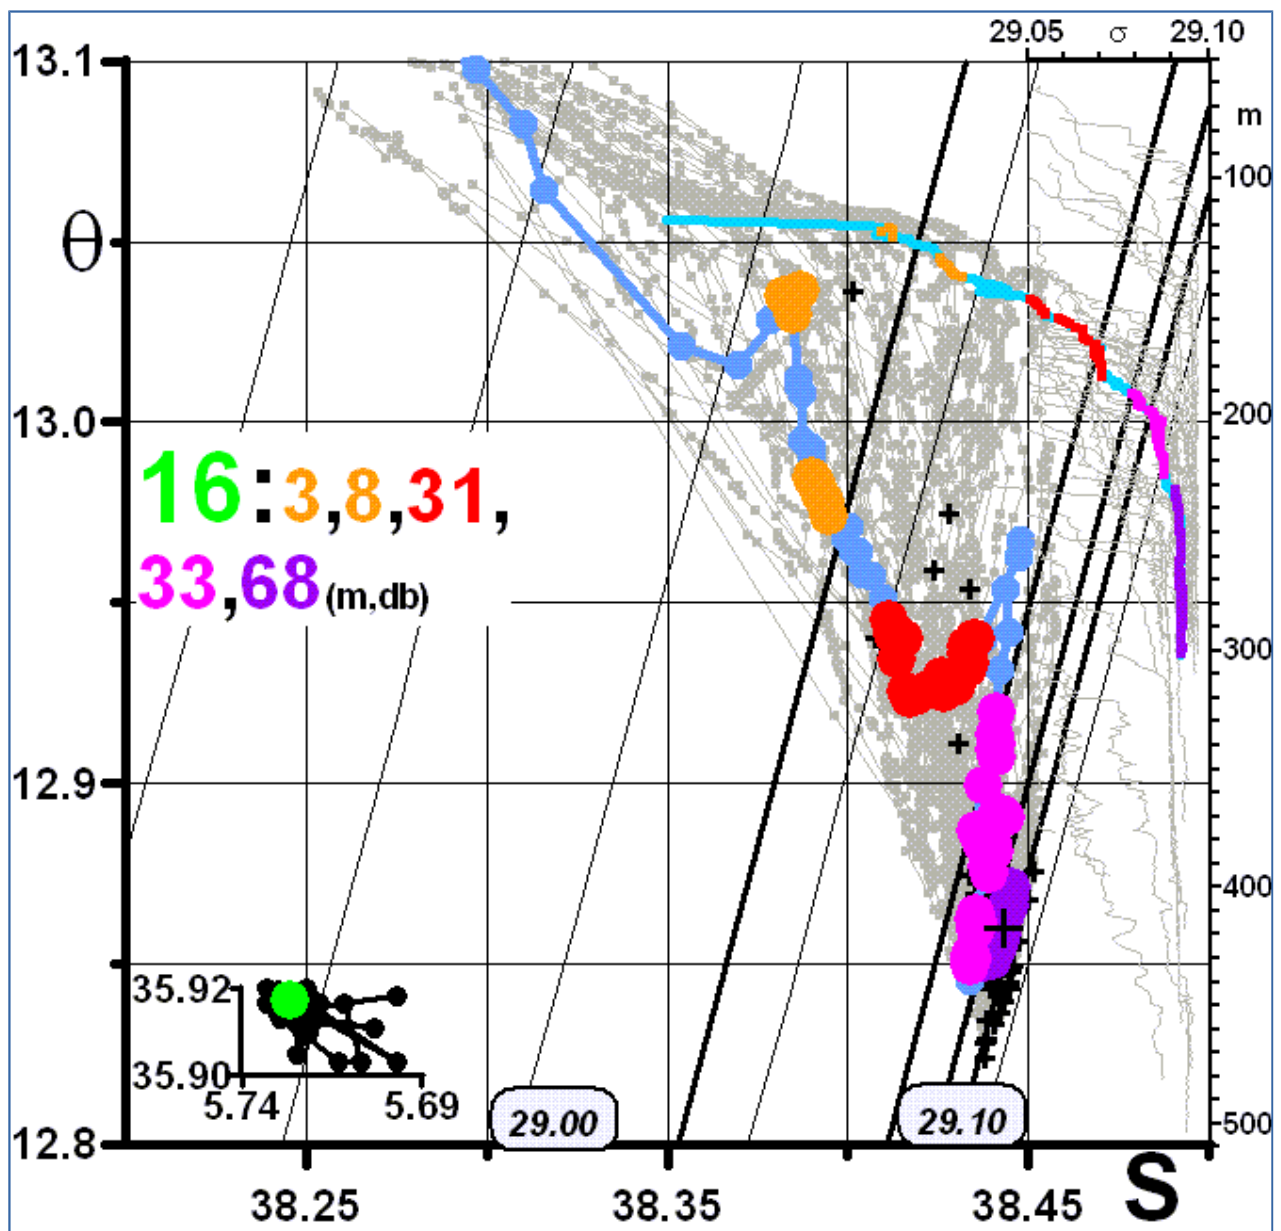

Figure S16. Same as in Fig.6a for profile #16 of the yo-yo time series at 5°43'W.

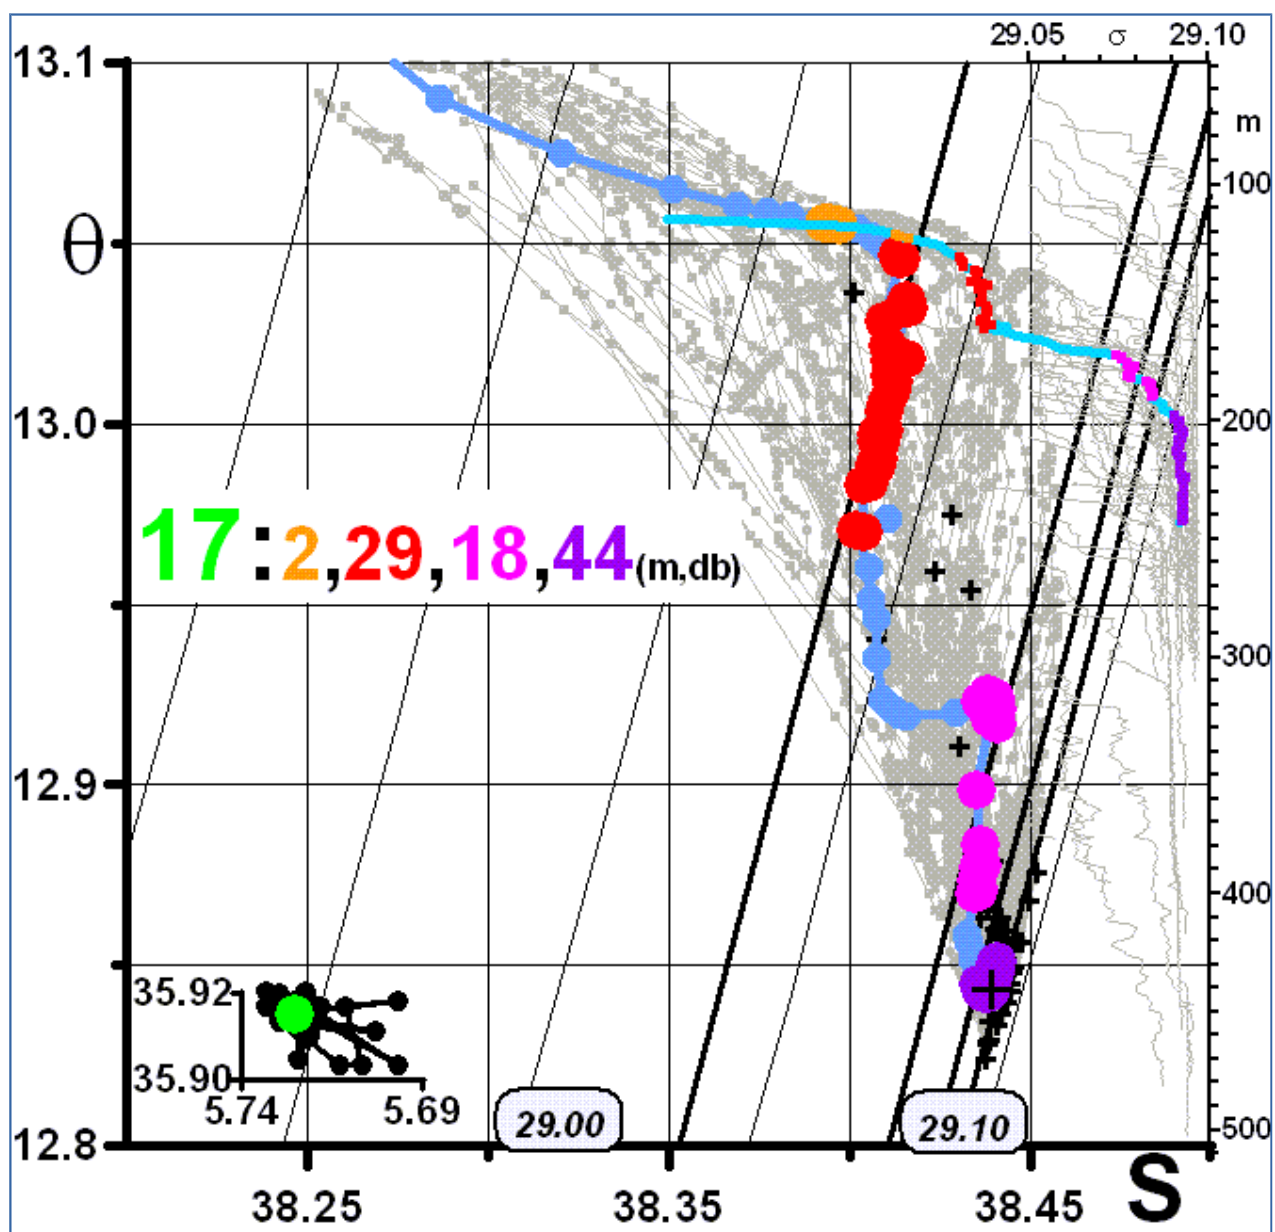

Figure S17. Same as in Fig.6a for profile #17 of the yo-yo time series at 5°43'W.

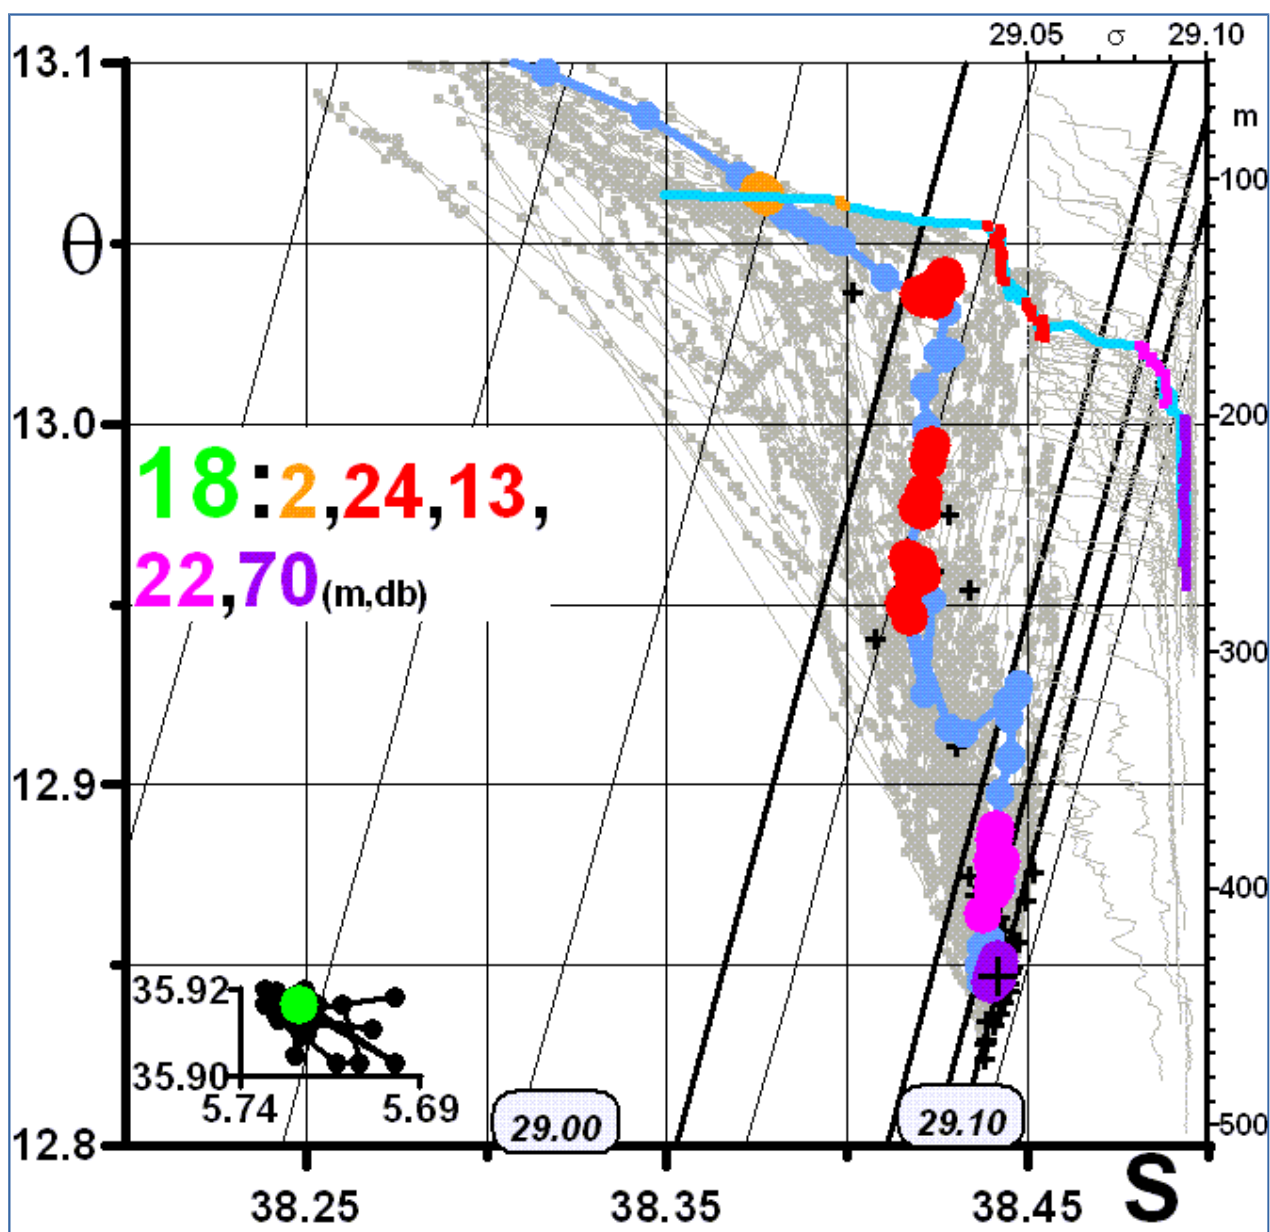

Figure S18. Same as in Fig.6a for profile #18 of the yo-yo time series at 5°43'W.

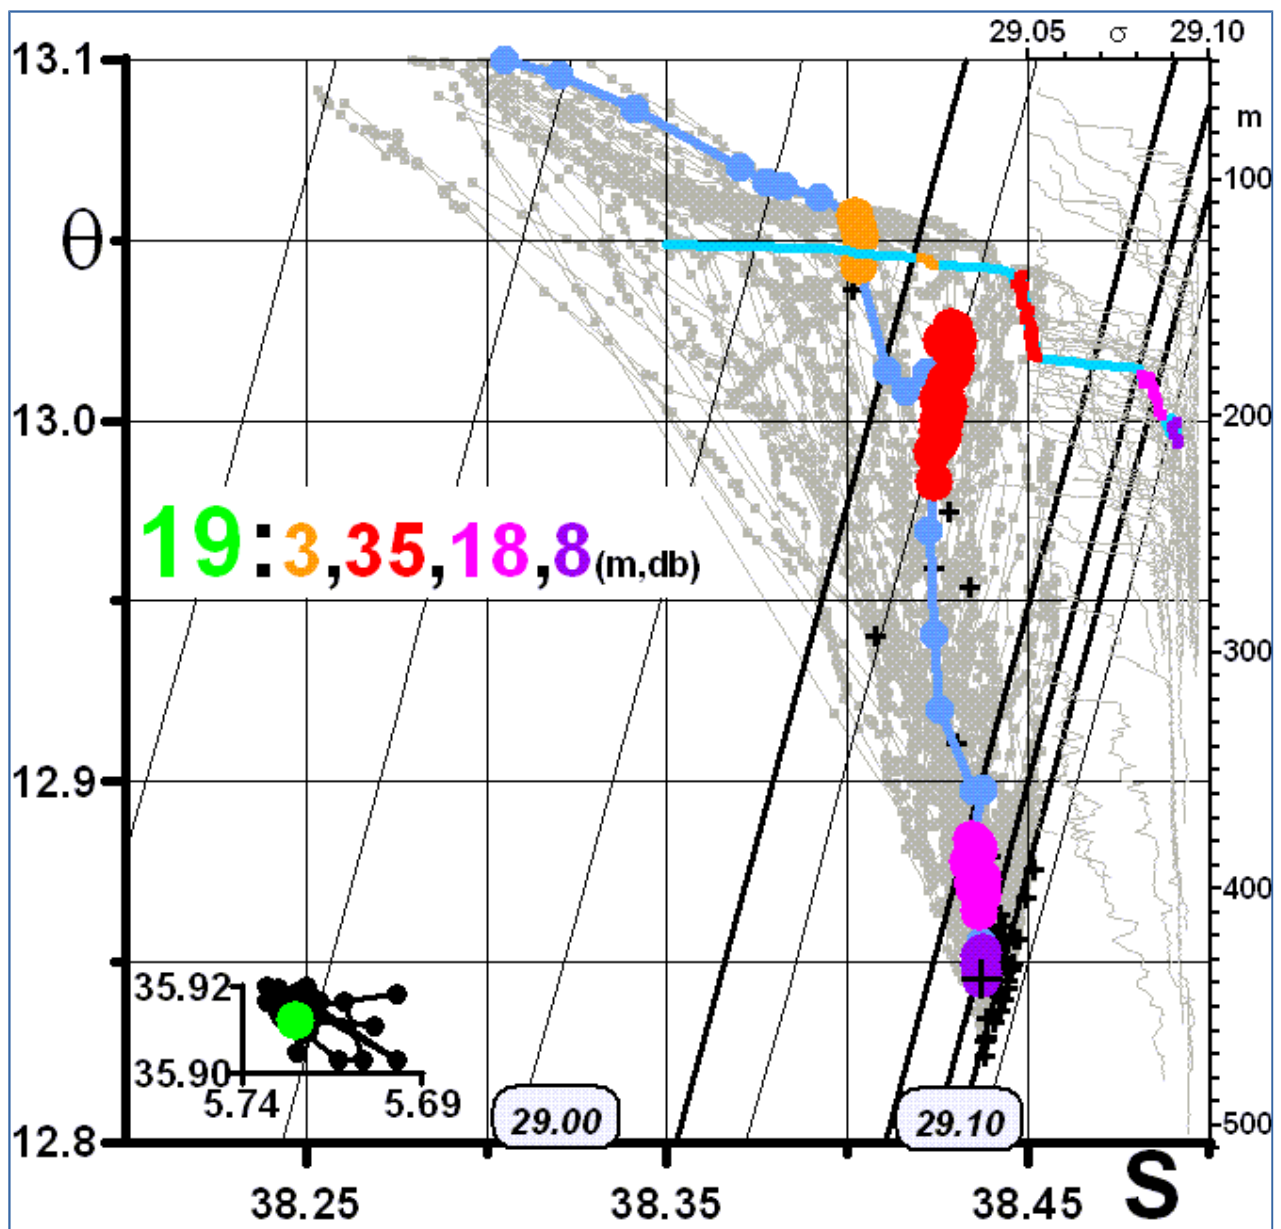

Figure S19. Same as in Fig.6a for profile #19 of the yo-yo time series at 5°43'W.

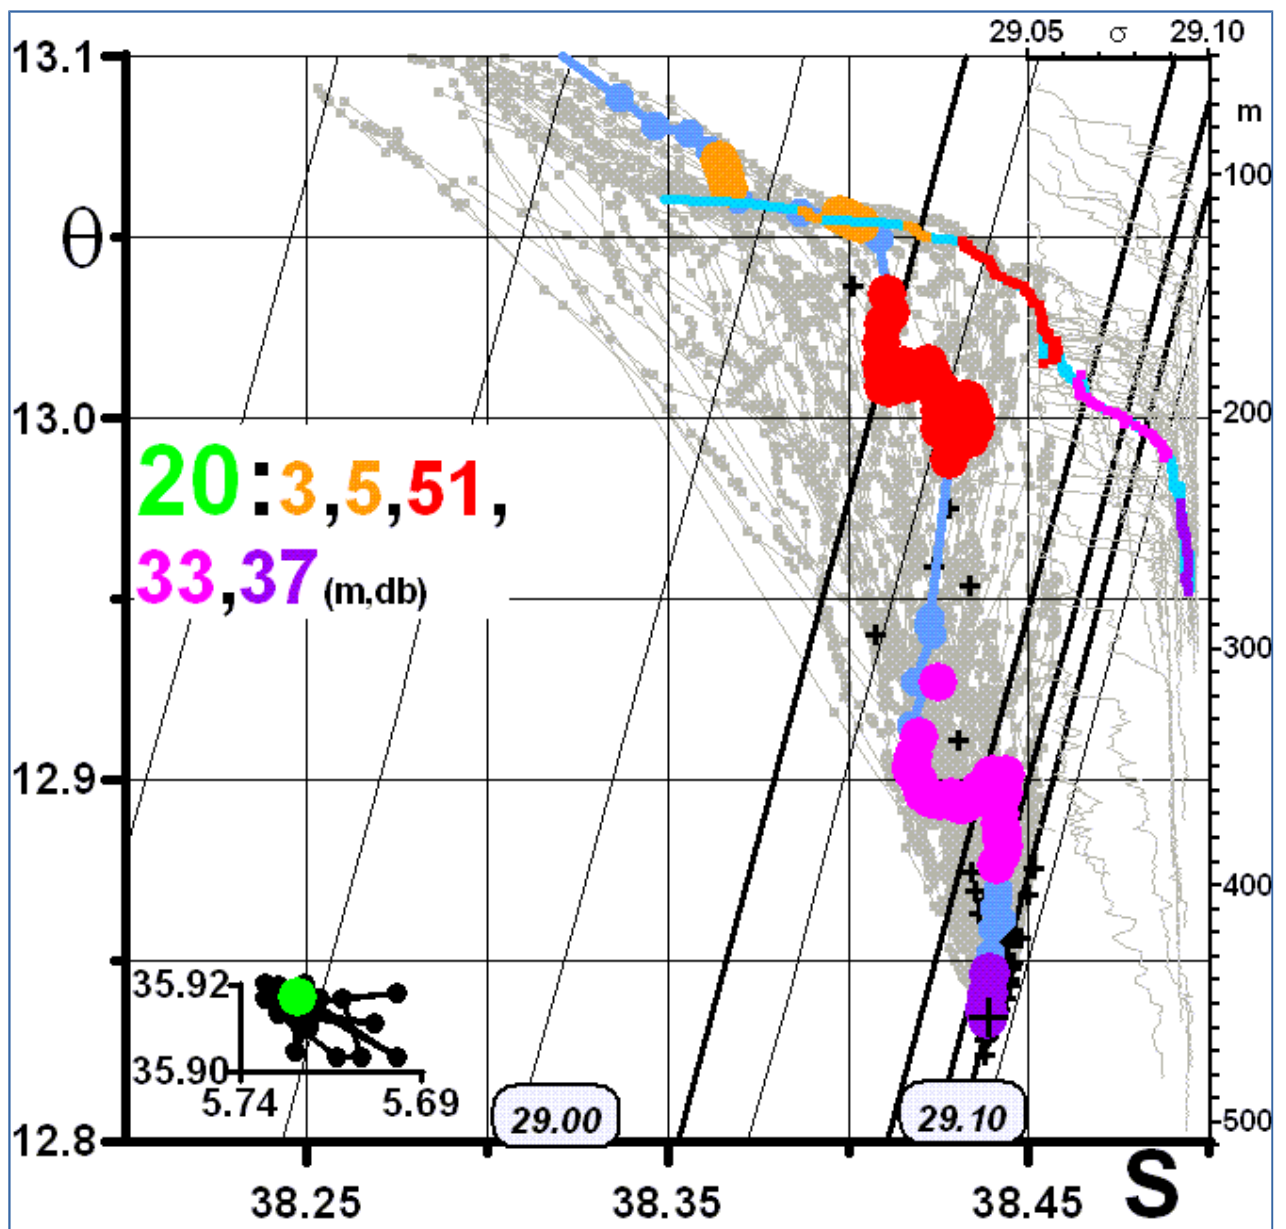

Figure S20. Same as in Fig.6a for profile #20 of the yo-yo time series at 5°43'W.

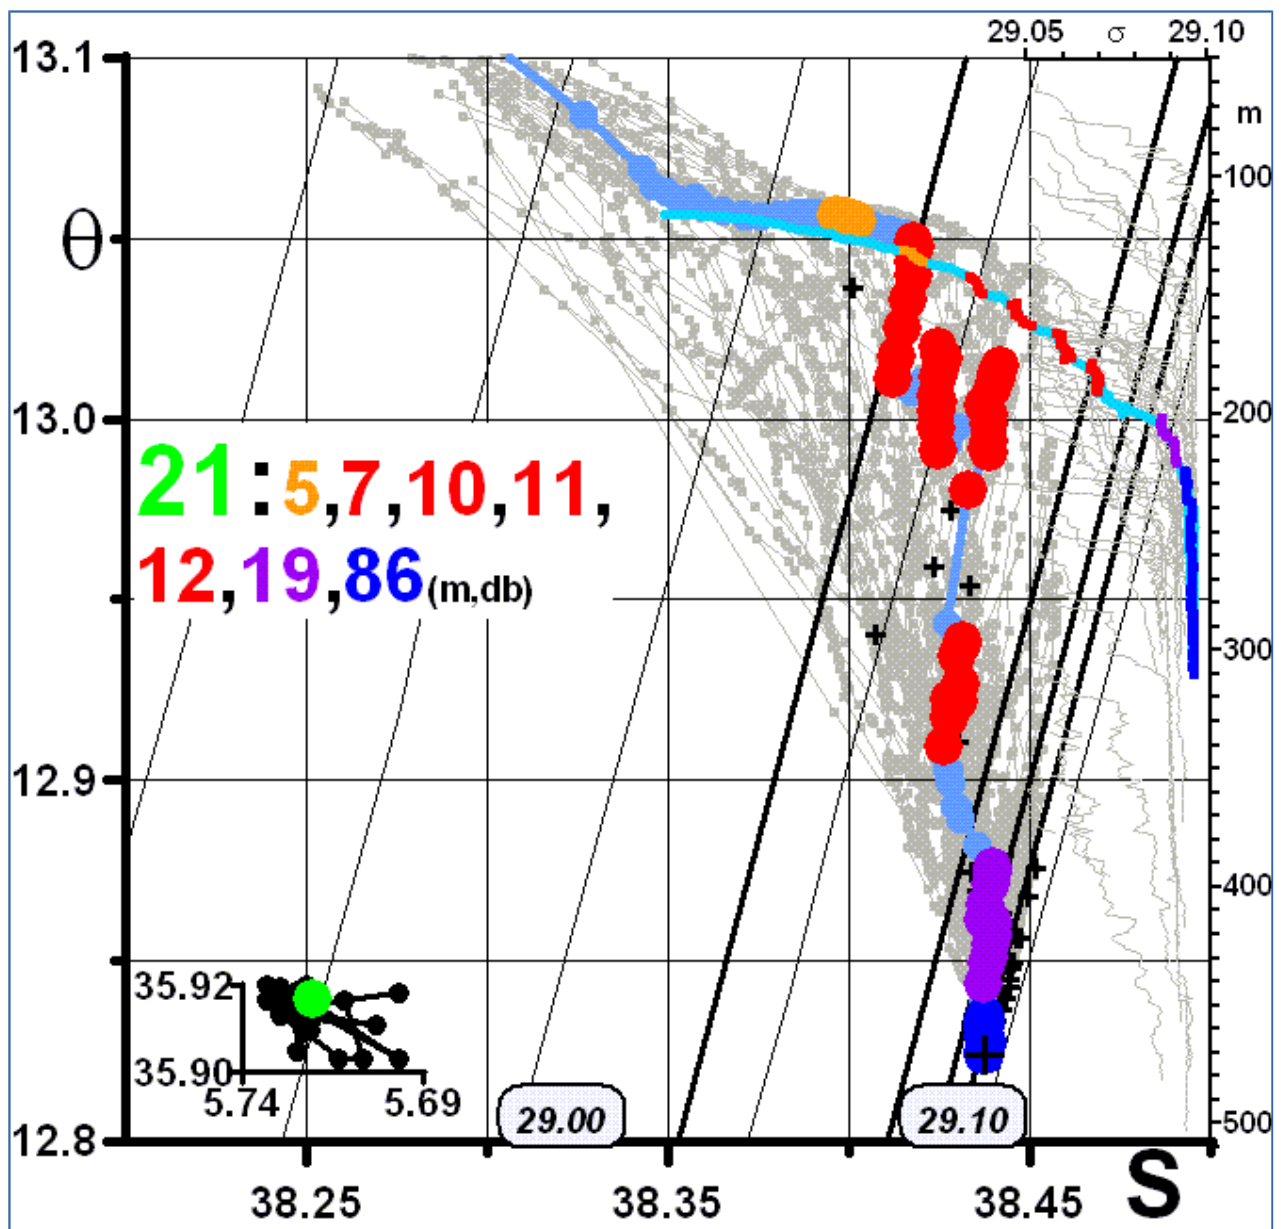

**Figure S21.** Same as in Fig.6a for profile #21 of the yo-yo time series at 5°43'W.

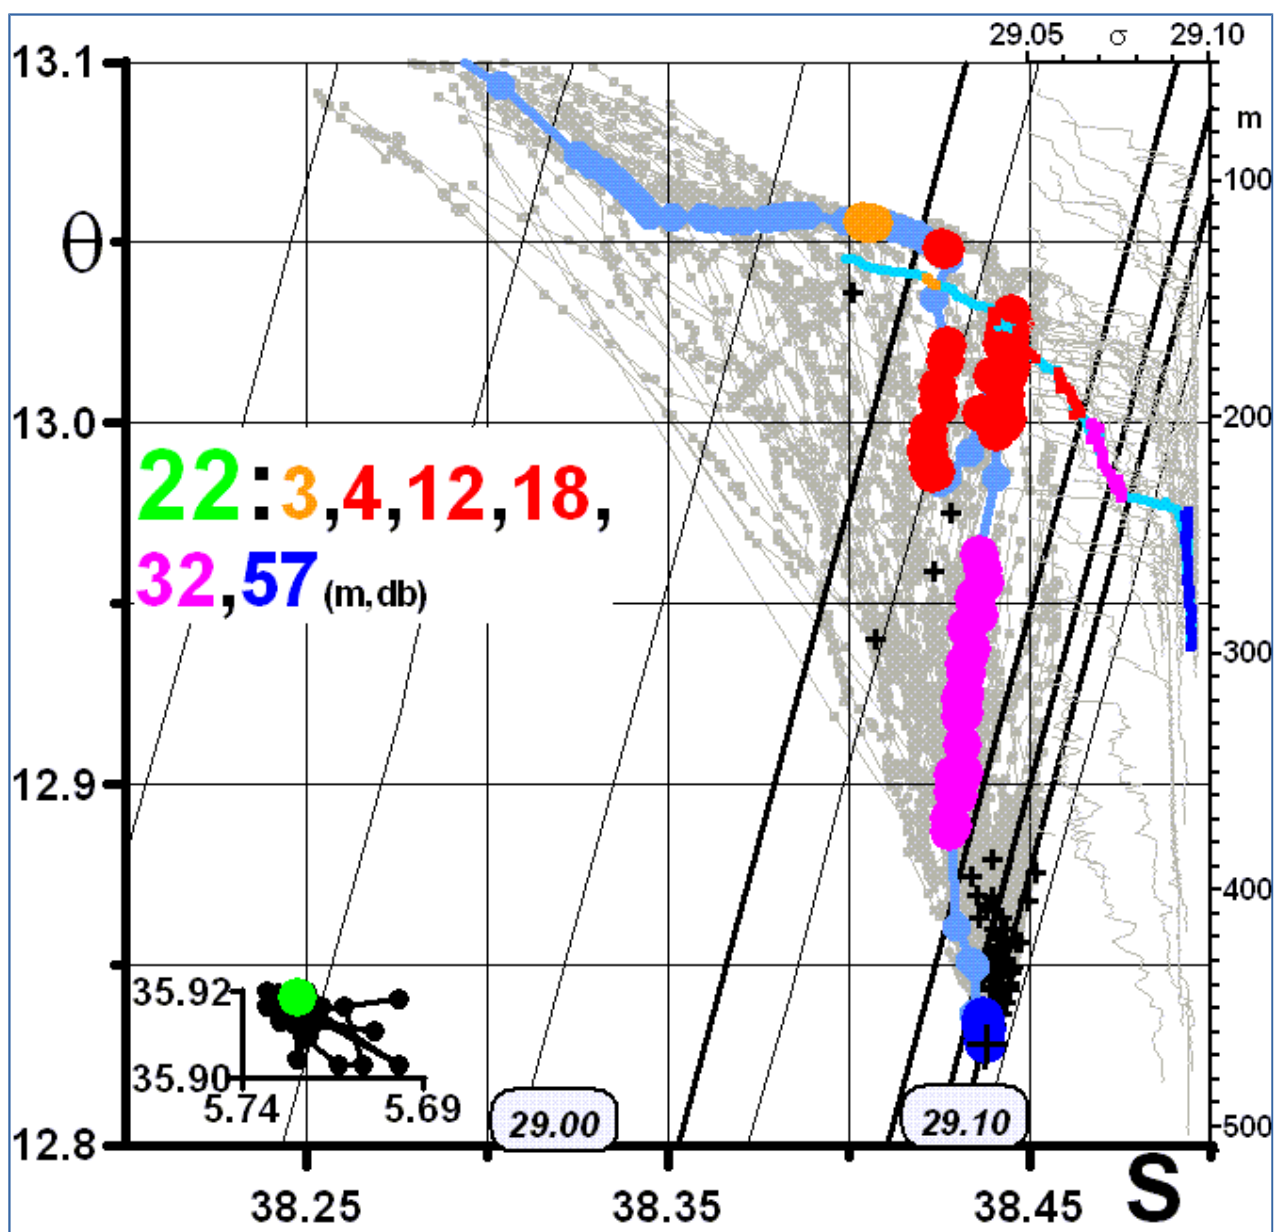

Figure S22. Same as in Fig.6a for profile #22 of the yo-yo time series at 5°43'W.

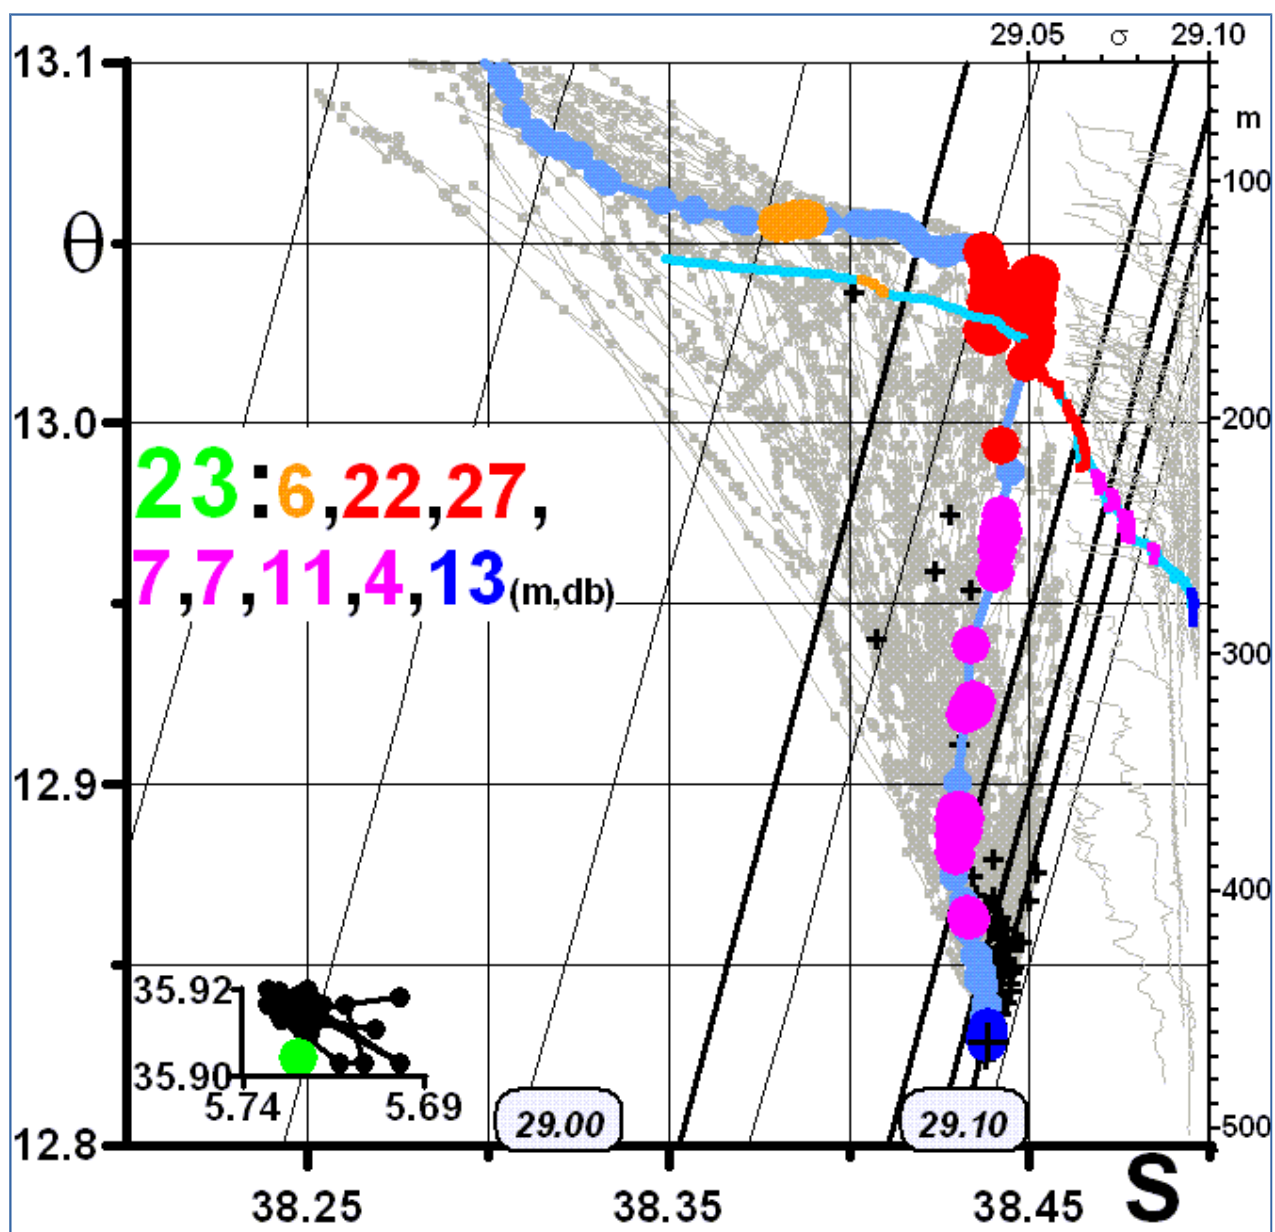

Figure S23. Same as in Fig.6a for profile #23 of the yo-yo time series at 5°43'W.

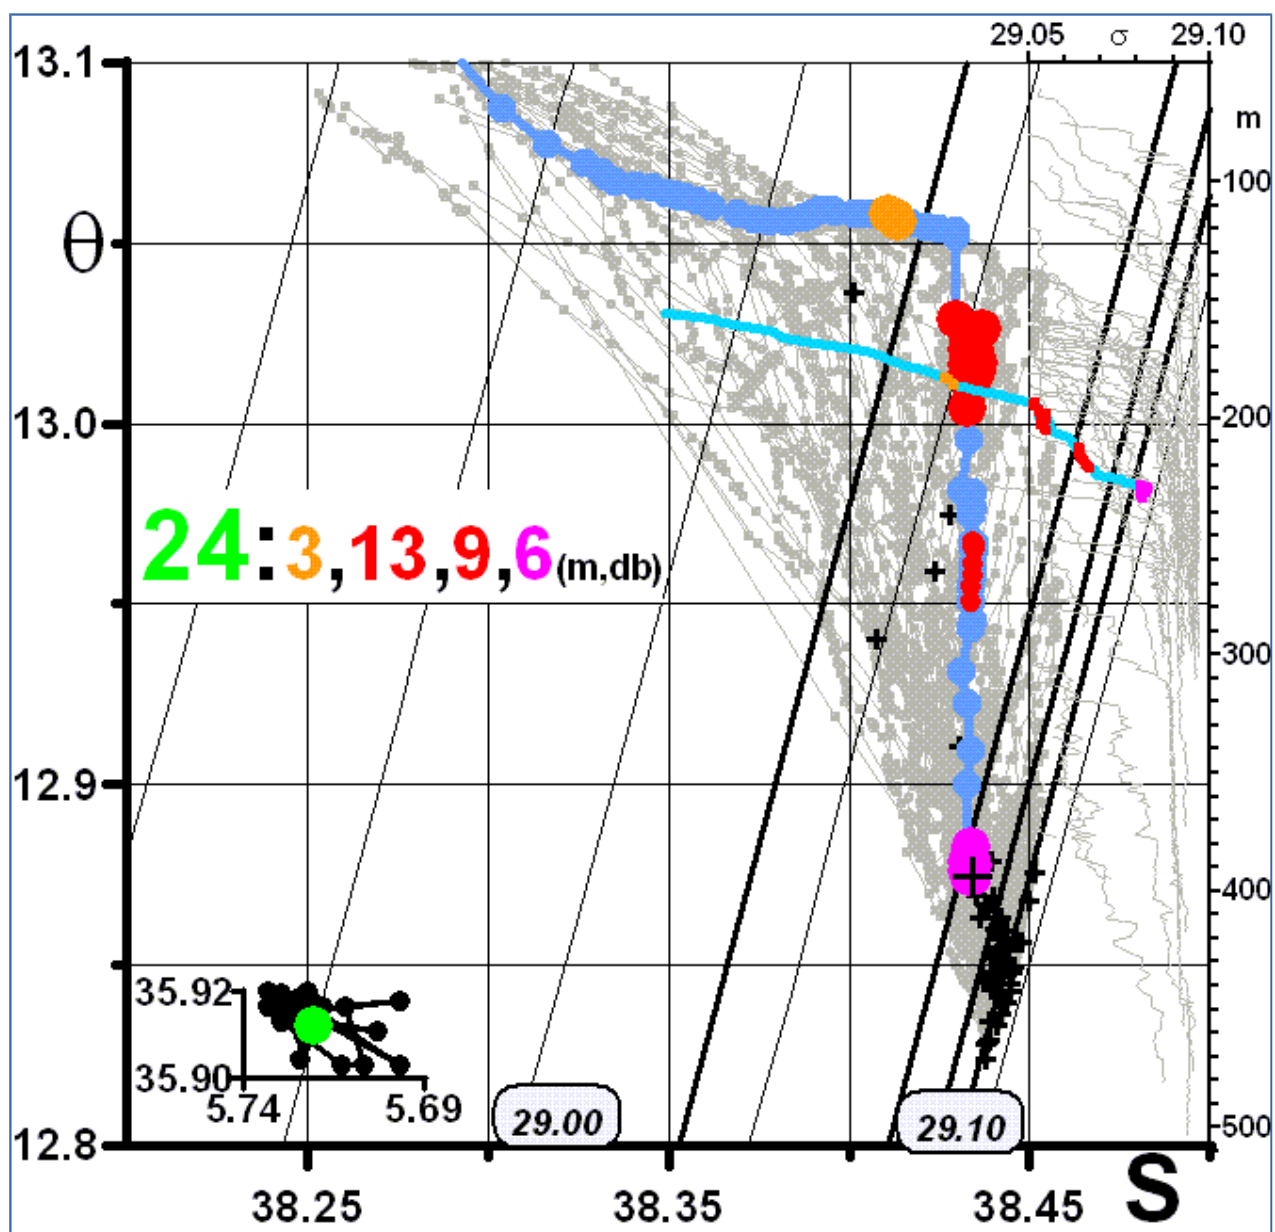

**Figure S24.** Same as in Fig.6a for profile #24 of the yo-yo time series at  $5^{\circ}43'W$ .

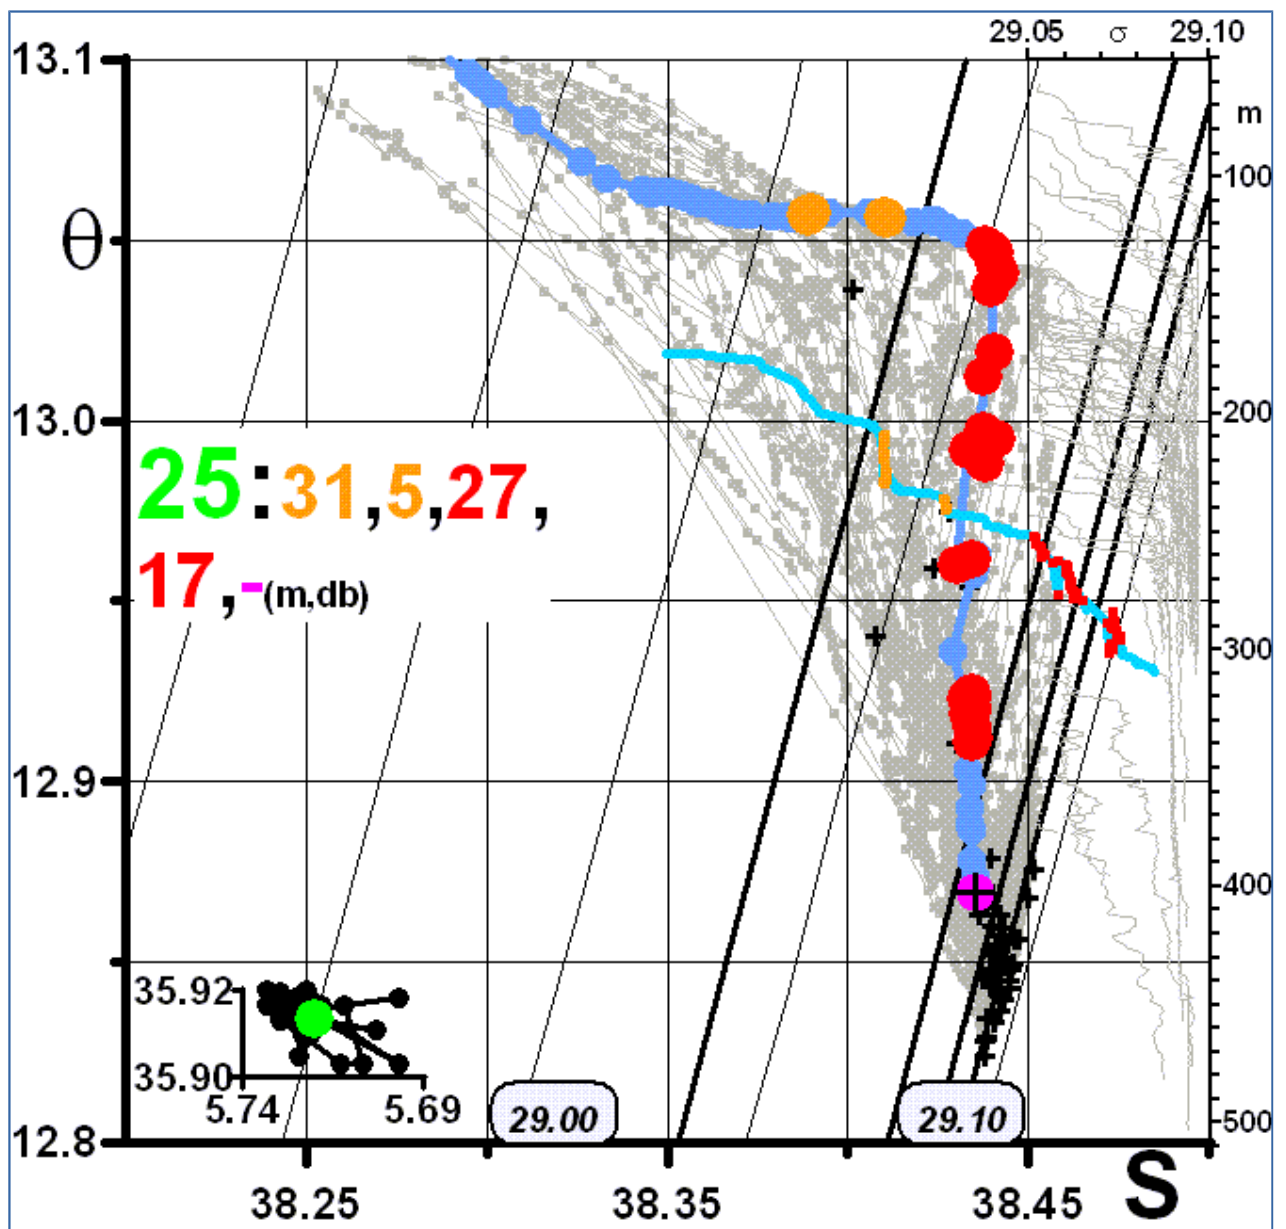

Figure S25. Same as in Fig.6a for profile #25 of the yo-yo time series at 5°43'W.

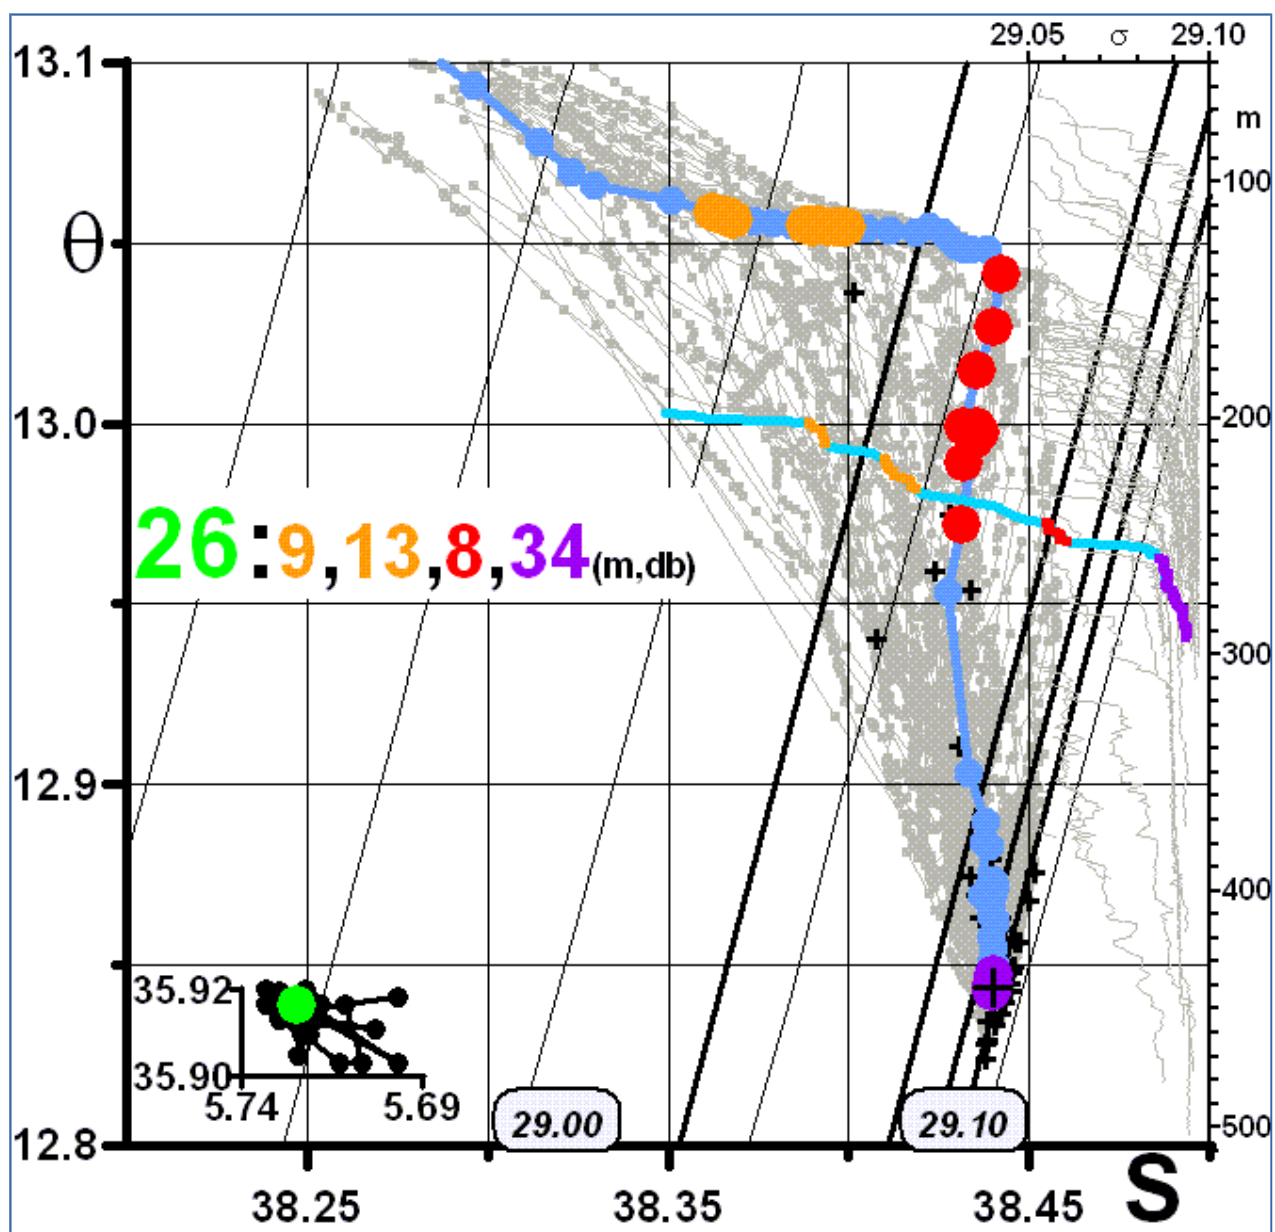

**Figure S26.** Same as in Fig.6a for profile #26 of the yo-yo time series at  $5^{\circ}43'W$ .

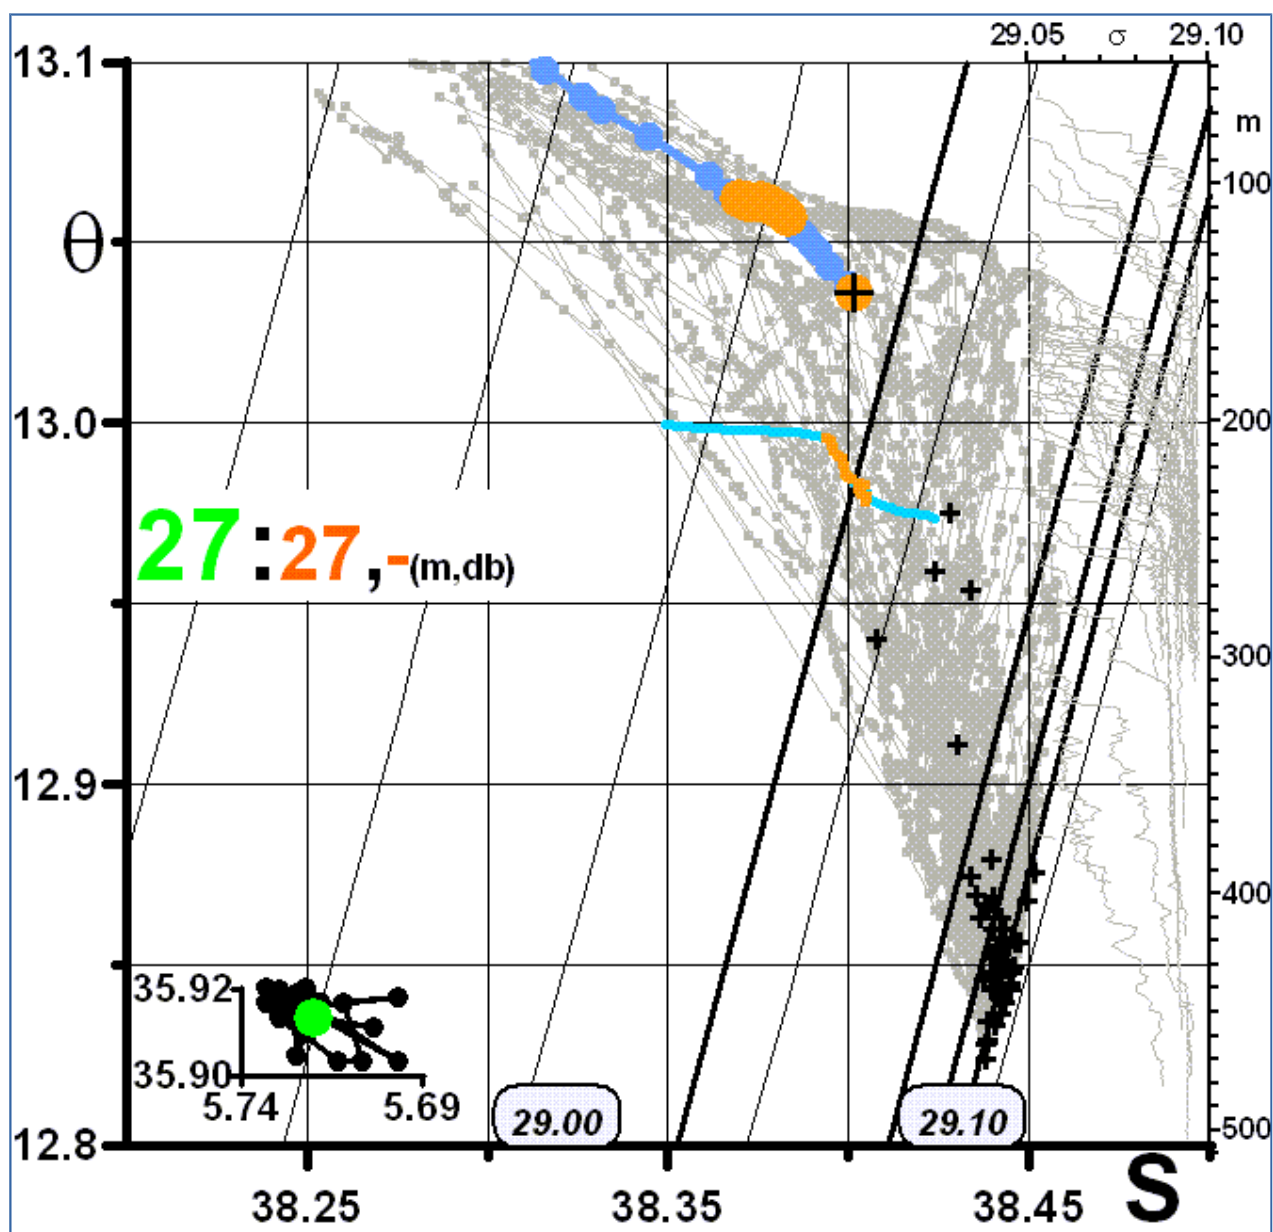

Figure S27. Same as in Fig.6a for profile #27 of the yo-yo time series at 5°43'W.

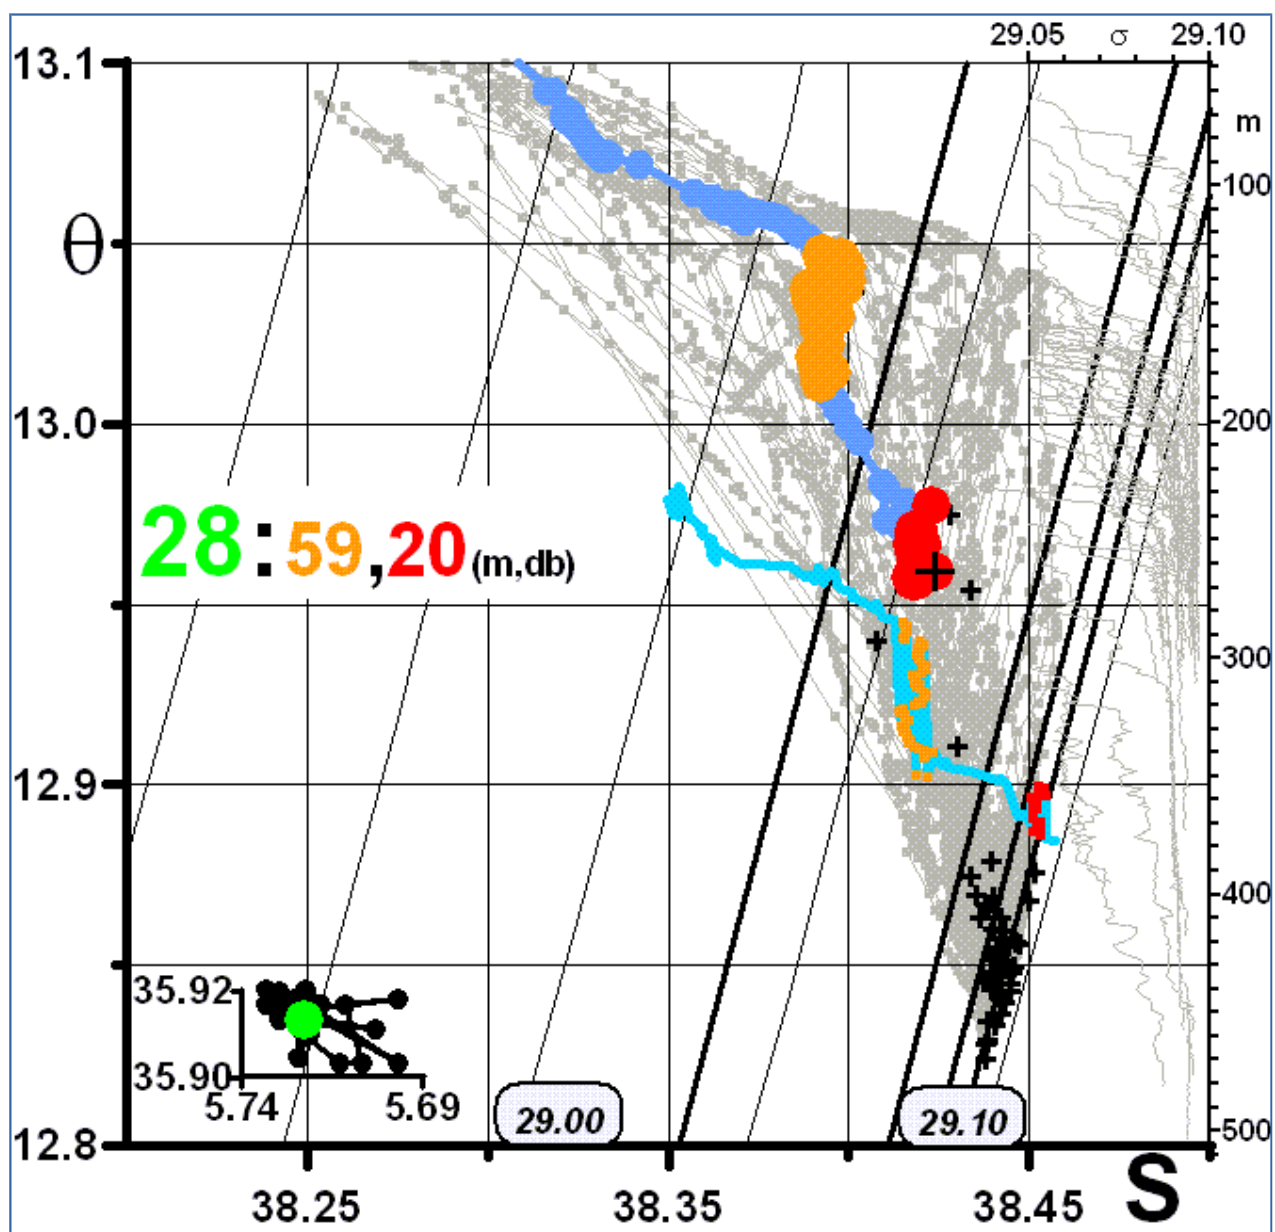

Figure S28. Same as in Fig.6a for profile #28 of the yo-yo time series at 5°43'W.

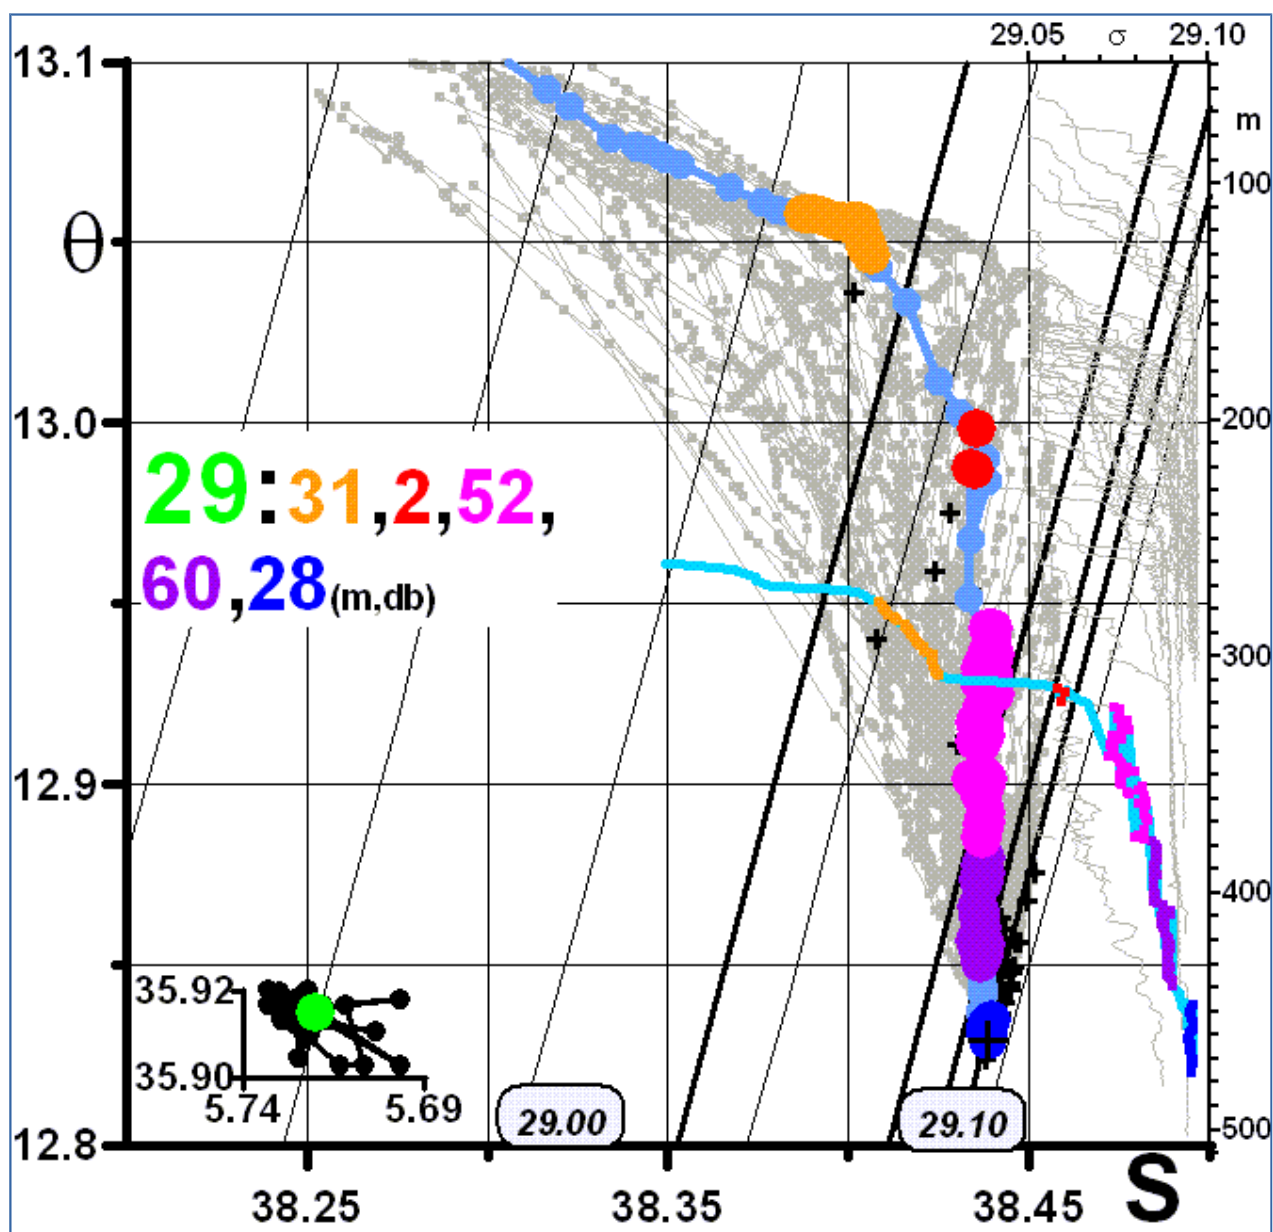

Figure S29. Same as in Fig.6a for profile #29 of the yo-yo time series at 5°43'W.

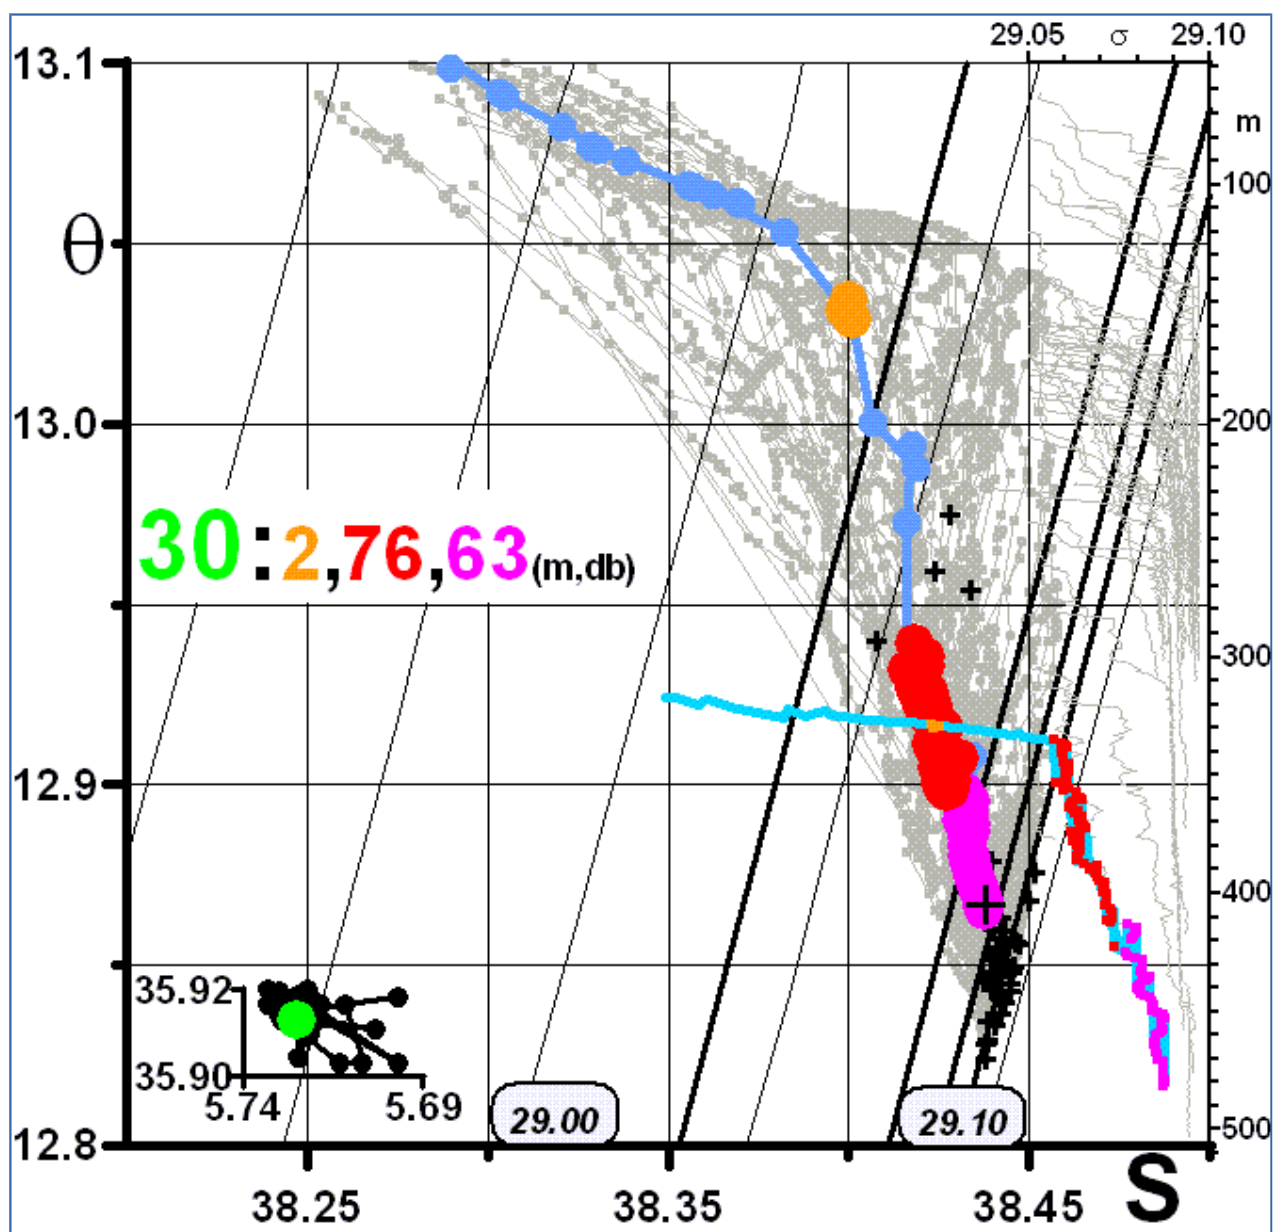

Figure S30. Same as in Fig.6a for profile #30 of the yo-yo time series at 5°43'W.

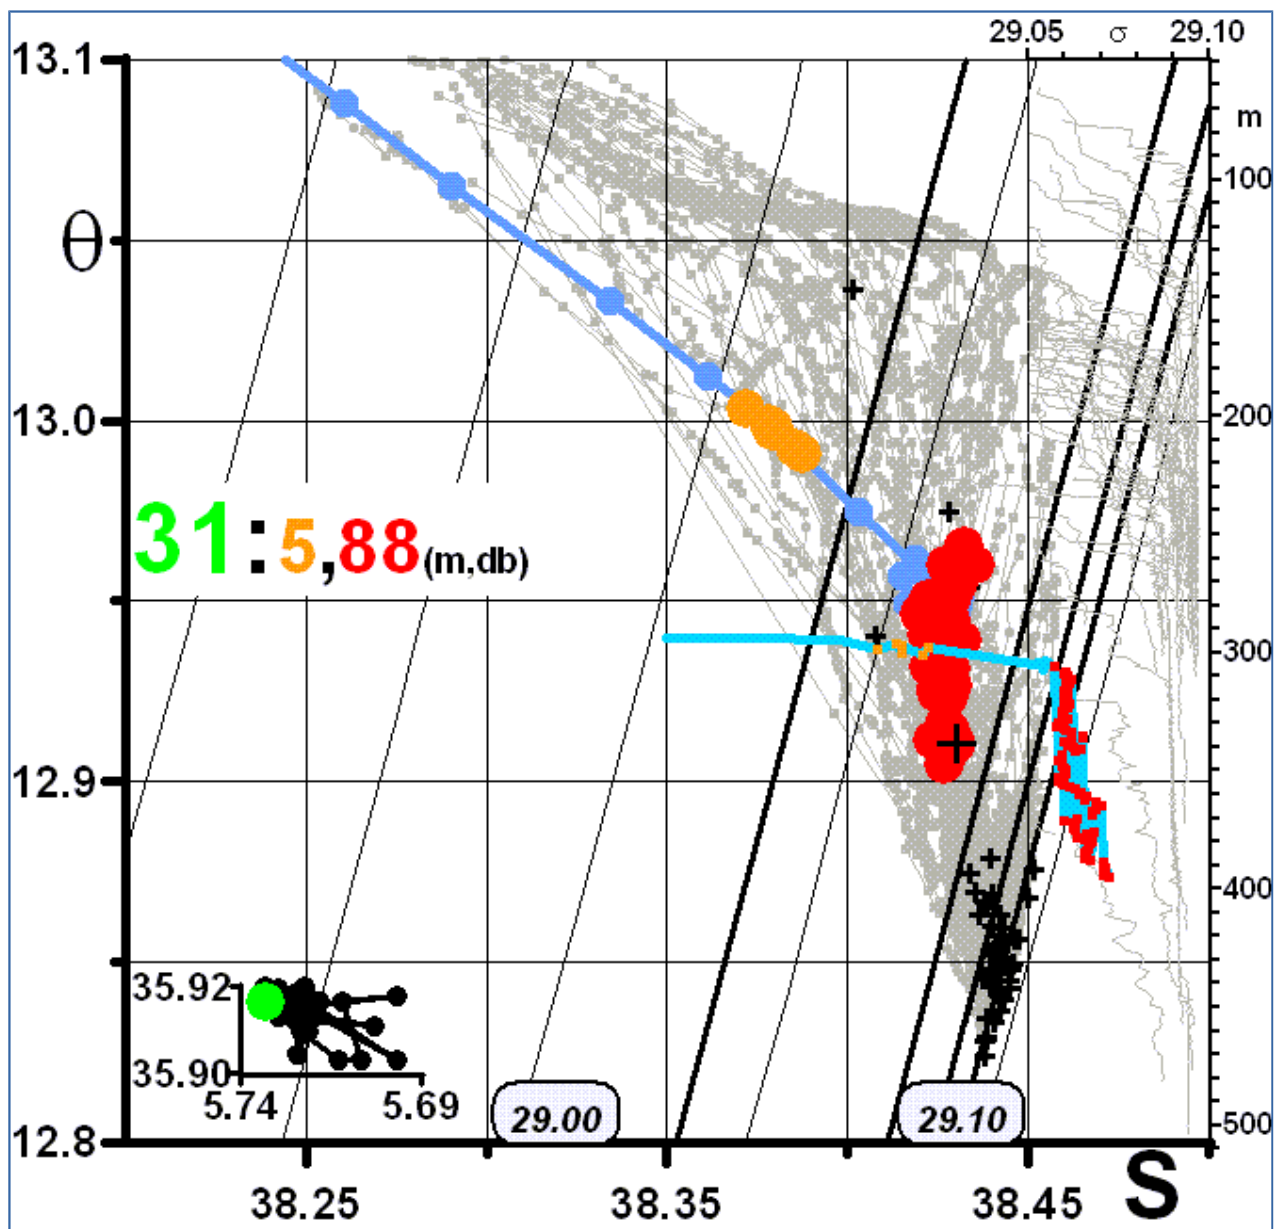

Figure S31. Same as in Fig.6a for profile #31 of the yo-yo time series at  $5^{\circ}43'W$ .

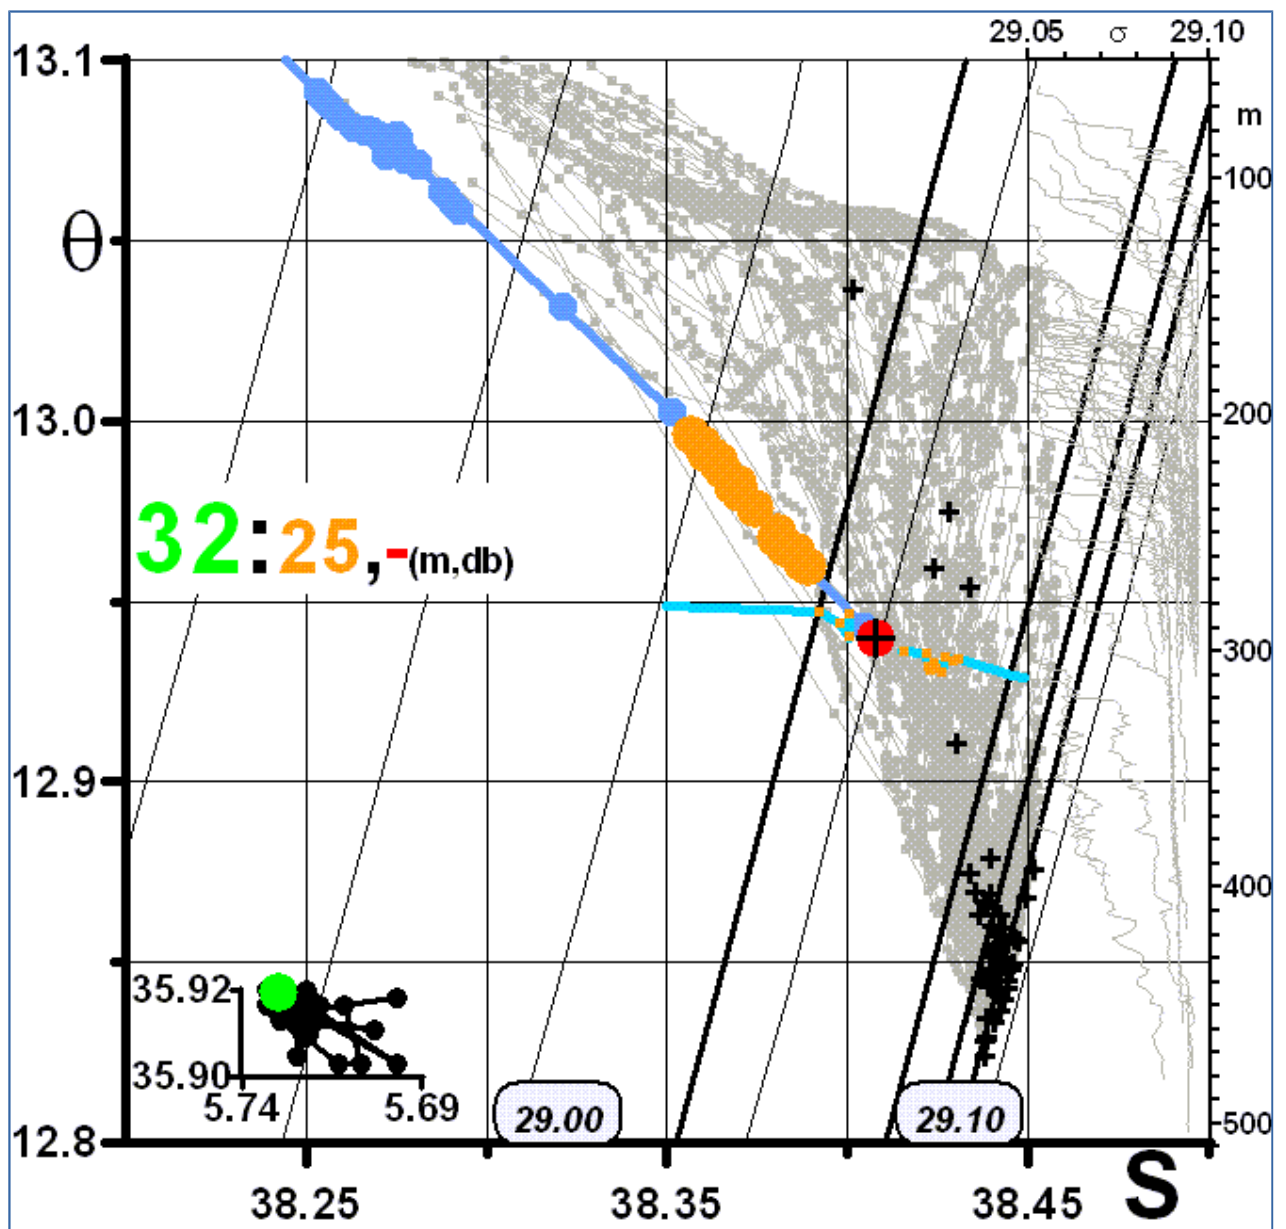

Figure S32. Same as in Fig.6a for profile #32 of the yo-yo time series at 5°43'W.

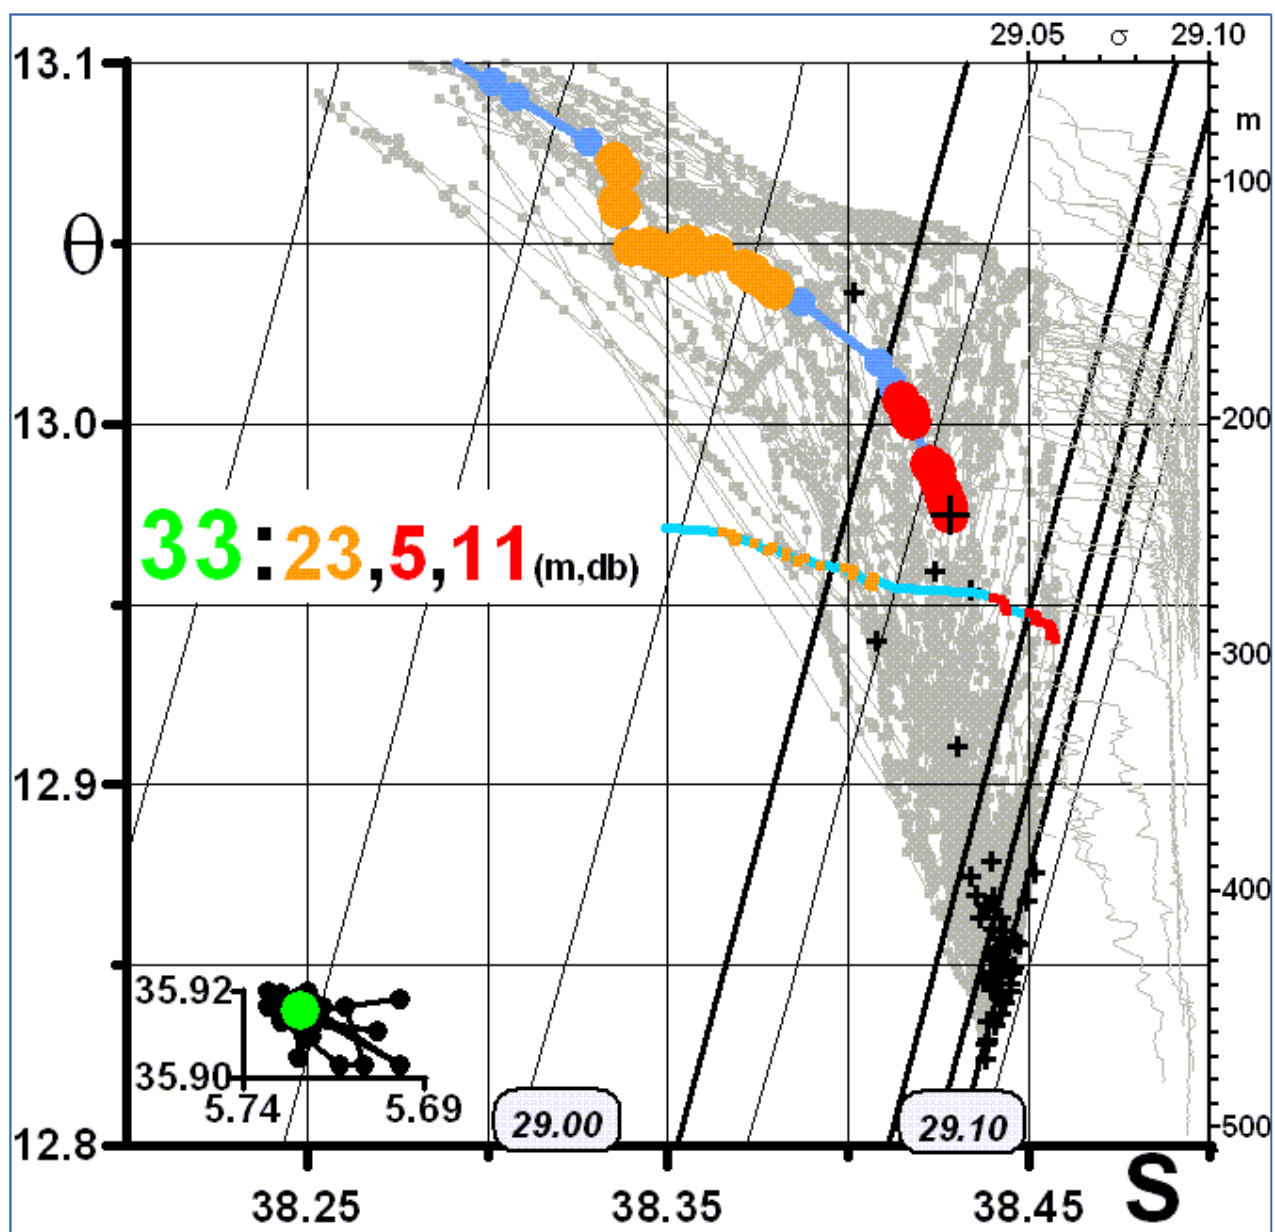

Figure S33. Same as in Fig.6a for profile #33 of the yo-yo time series at 5°43'W.

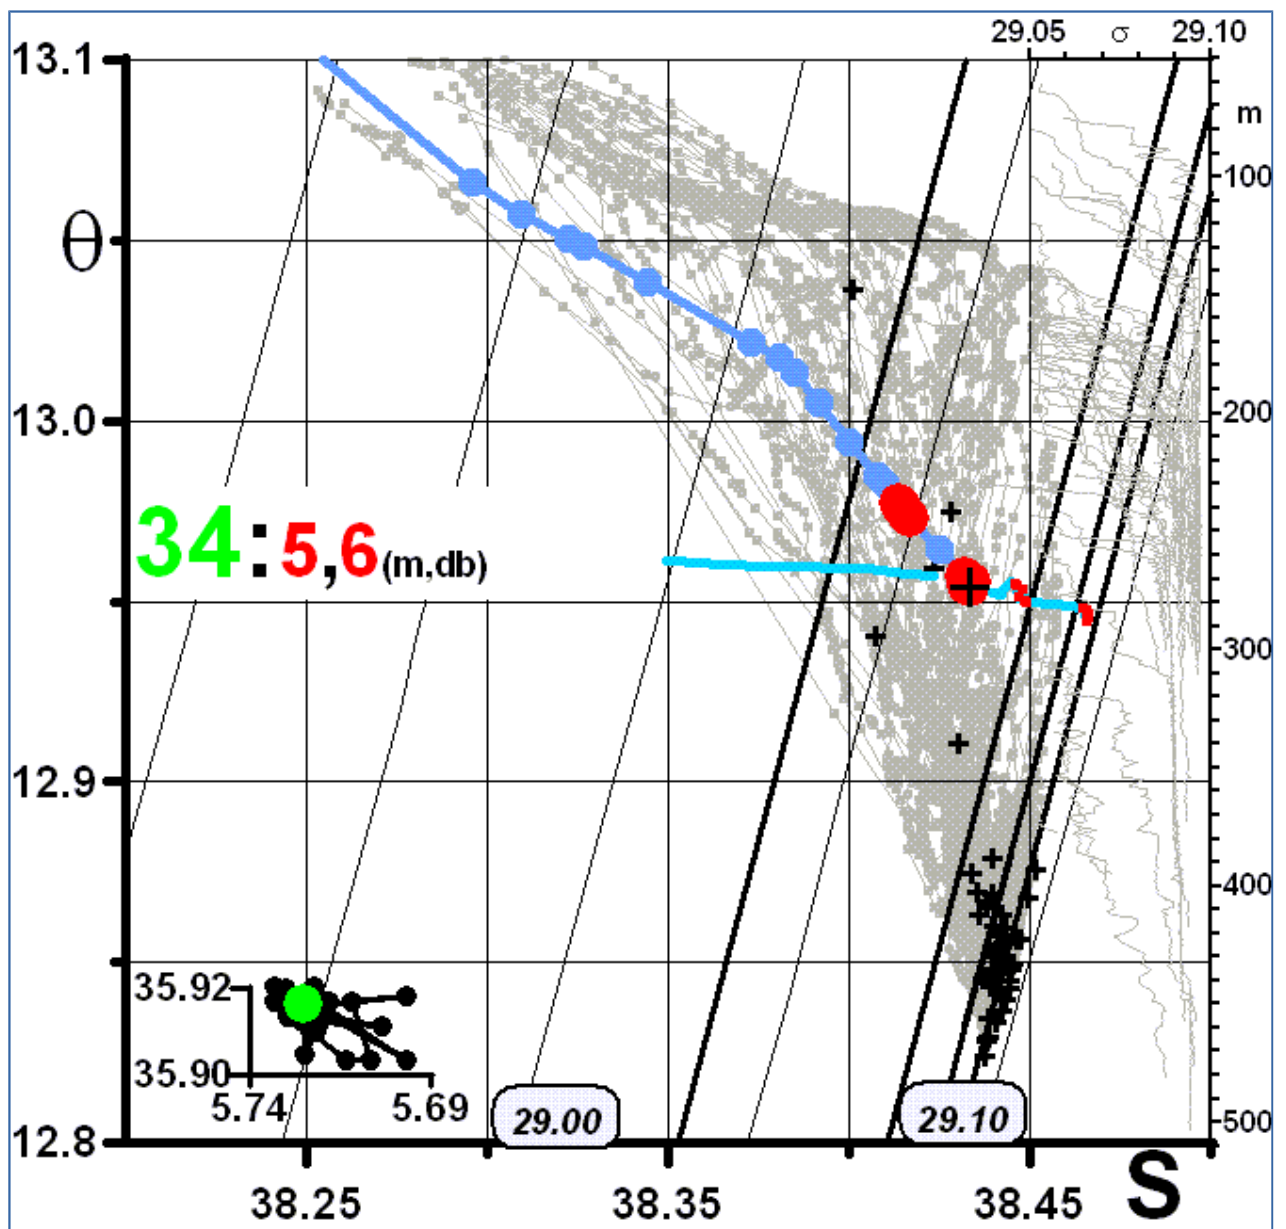

**Figure S34.** Same as in Fig.6a for profile #34 of the yo-yo time series at  $5^{\circ}43'W$ .

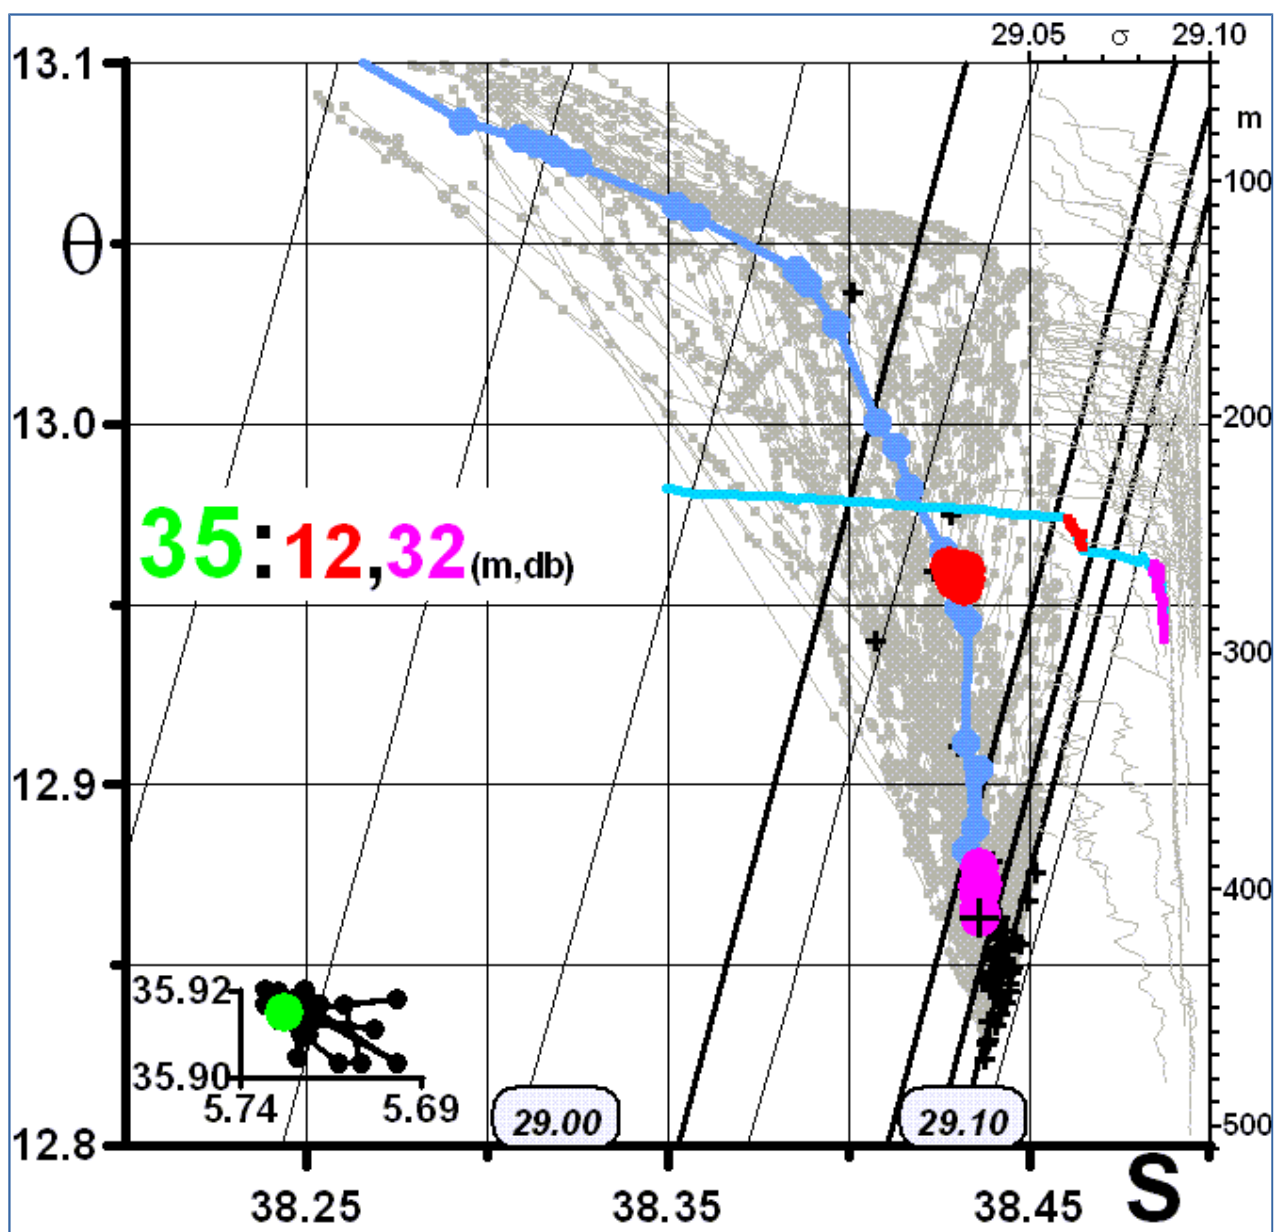

Figure S35. Same as in Fig.6a for profile #35 of the yo-yo time series at  $5^{\circ}43'W$ .

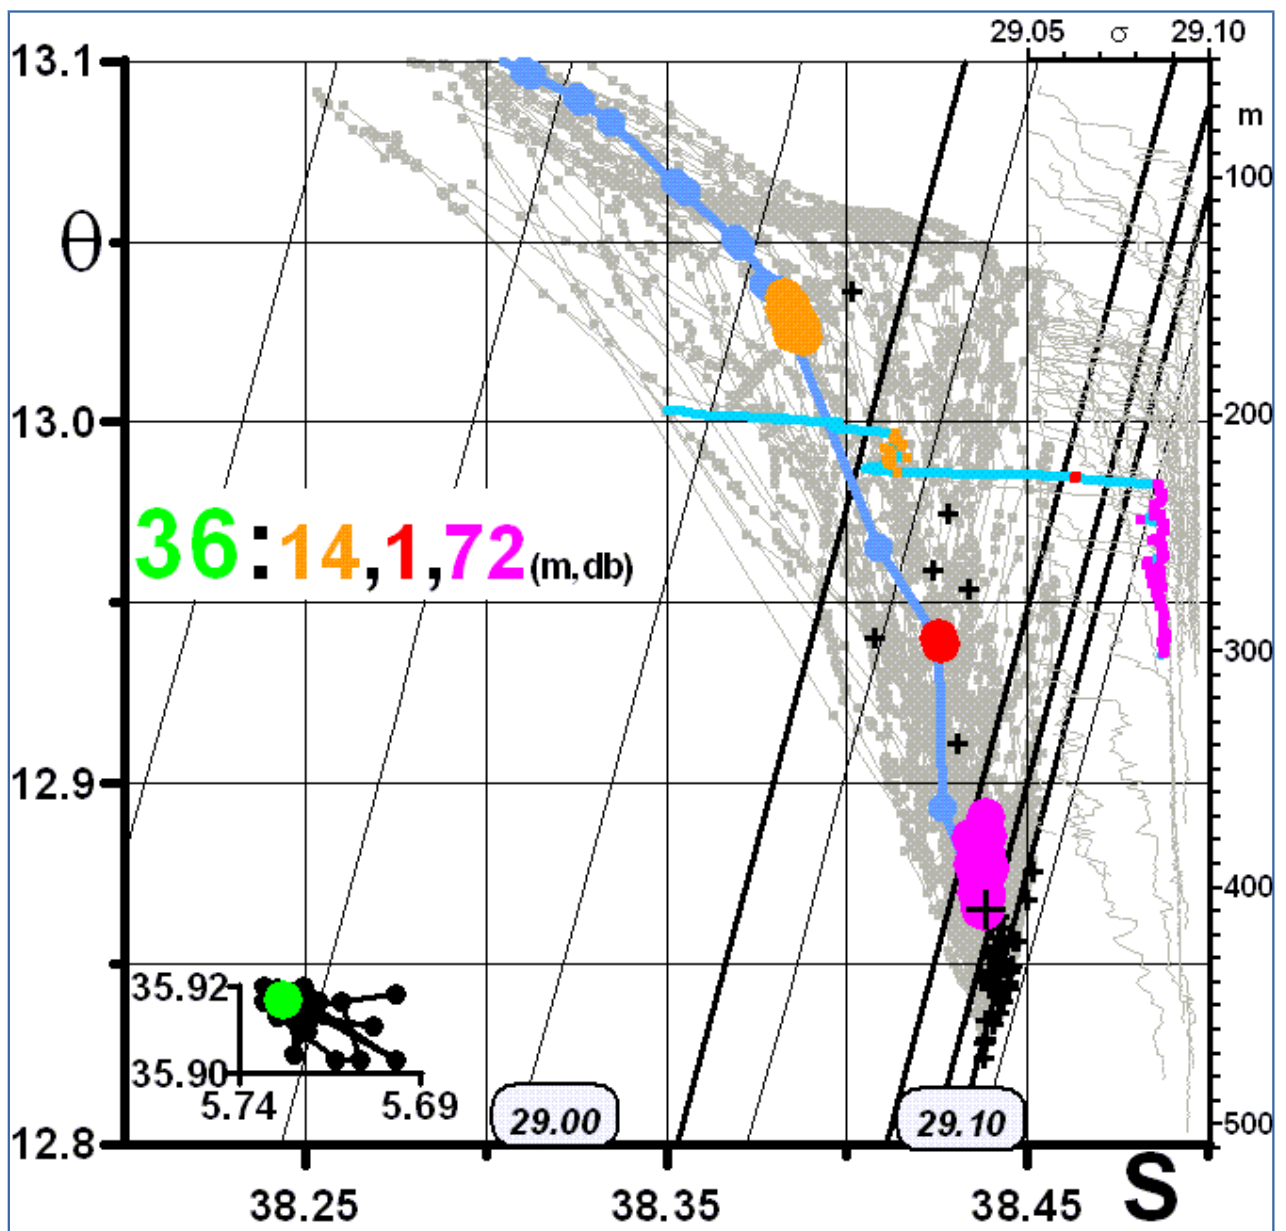

Figure S36. Same as in Fig.6a for profile #36 of the yo-yo time series at 5°43'W.

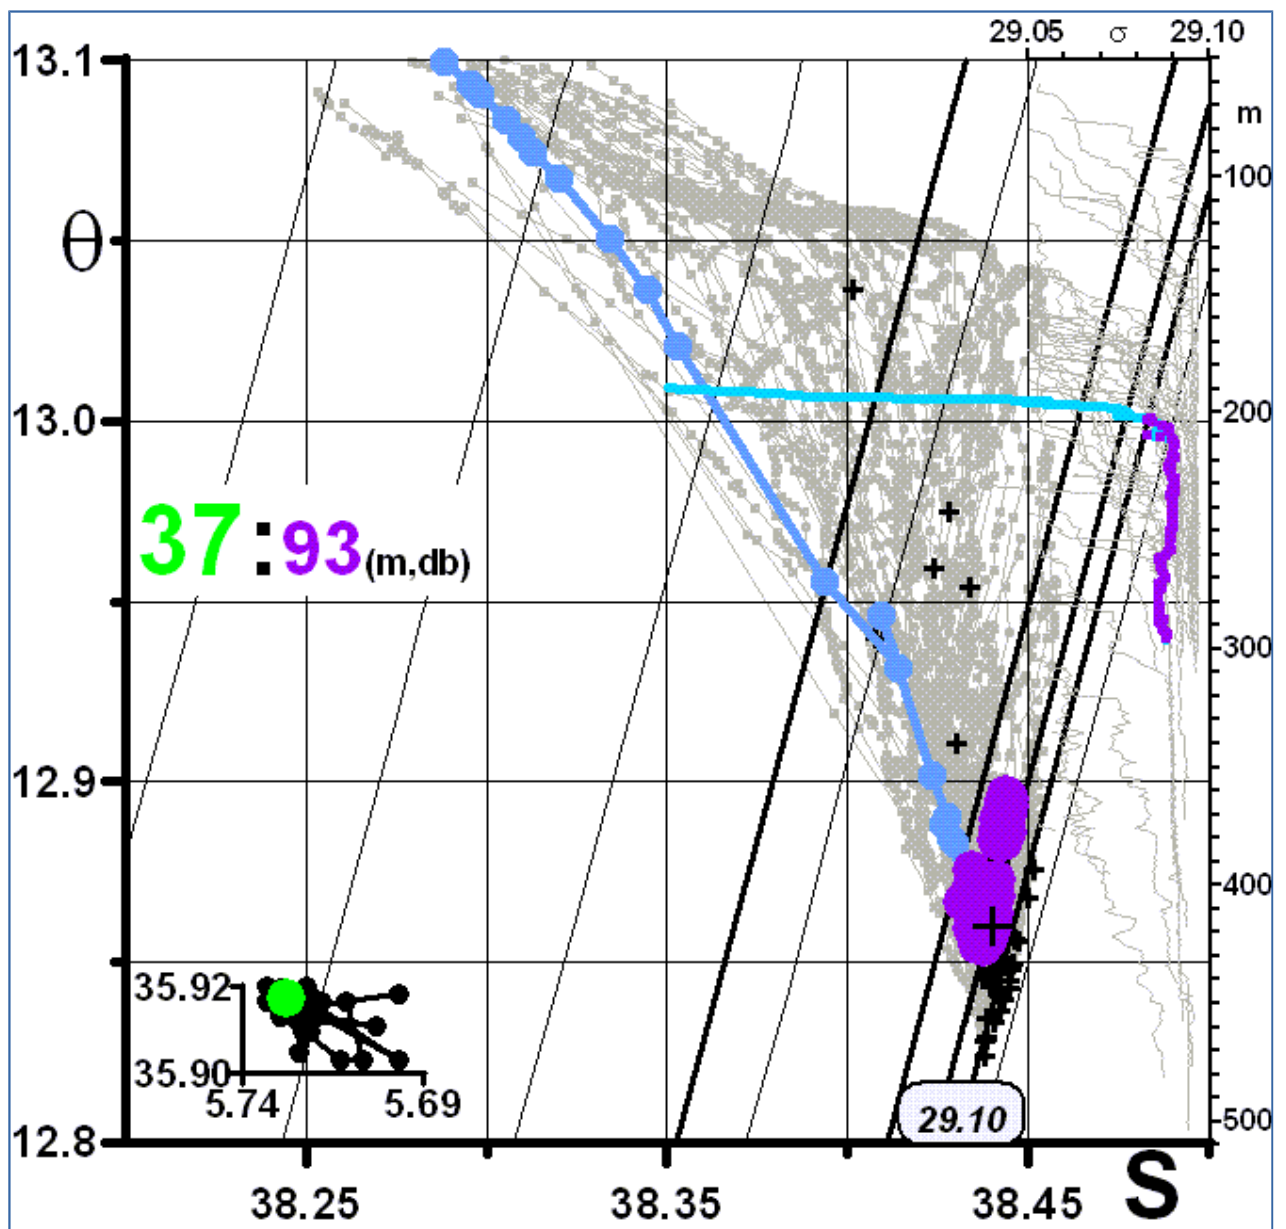

Figure S37. Same as in Fig.6a for profile #37 of the yo-yo time series at  $5^{\circ}43'W$ .

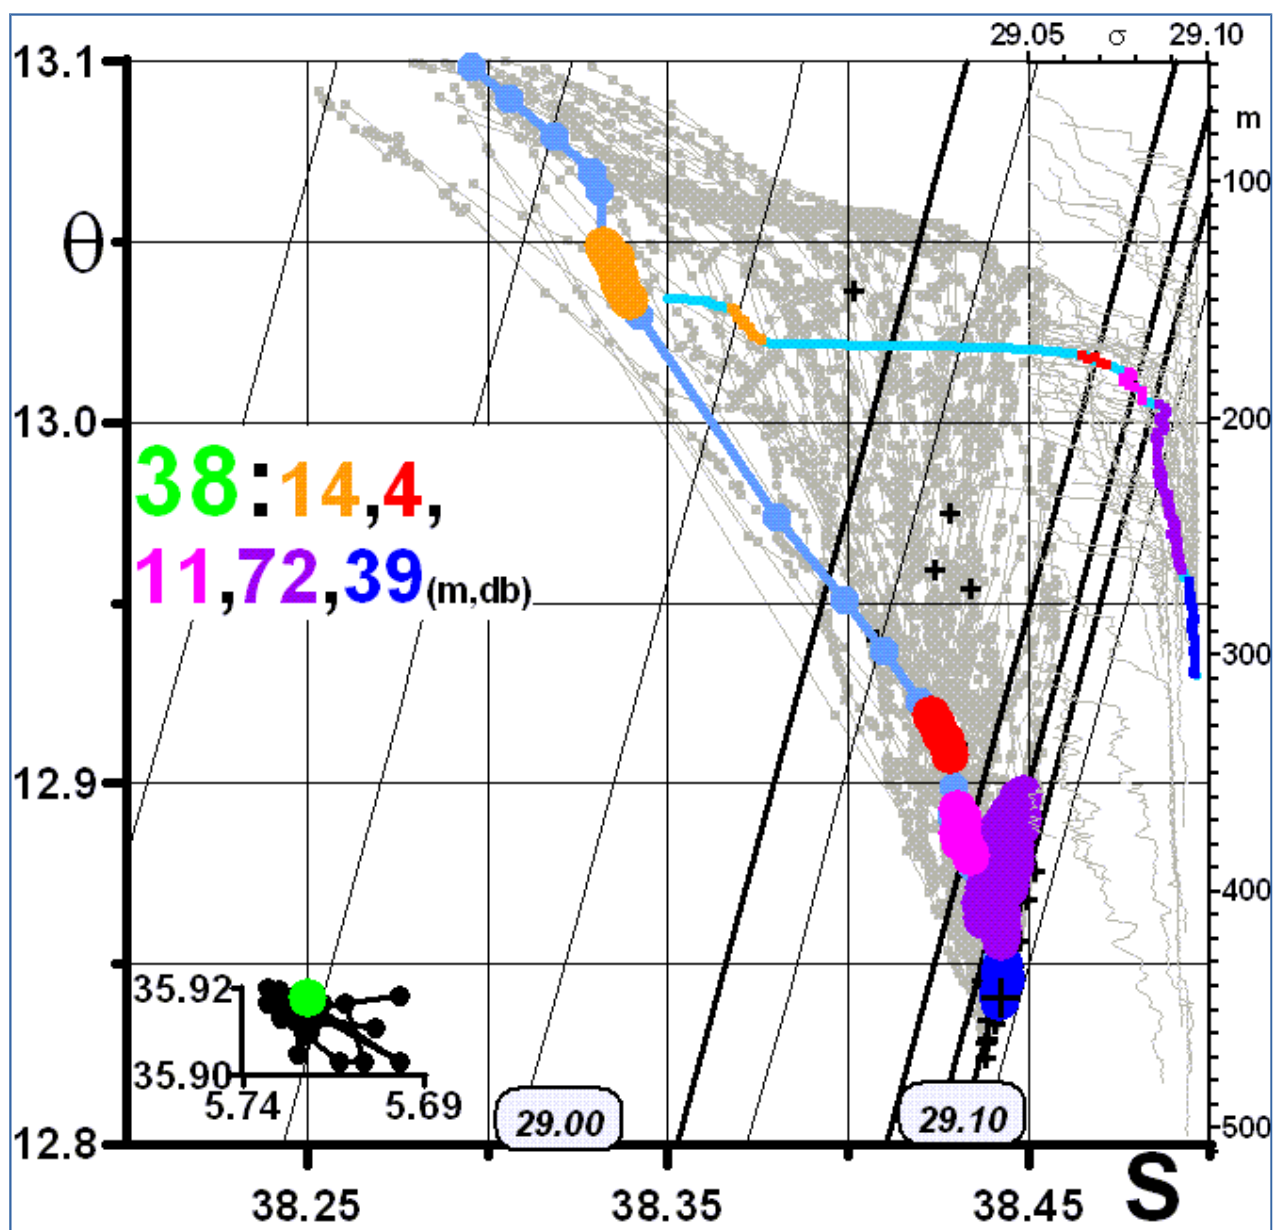

Figure S38. Same as in Fig.6a for profile #38 of the yo-yo time series at 5°43'W.

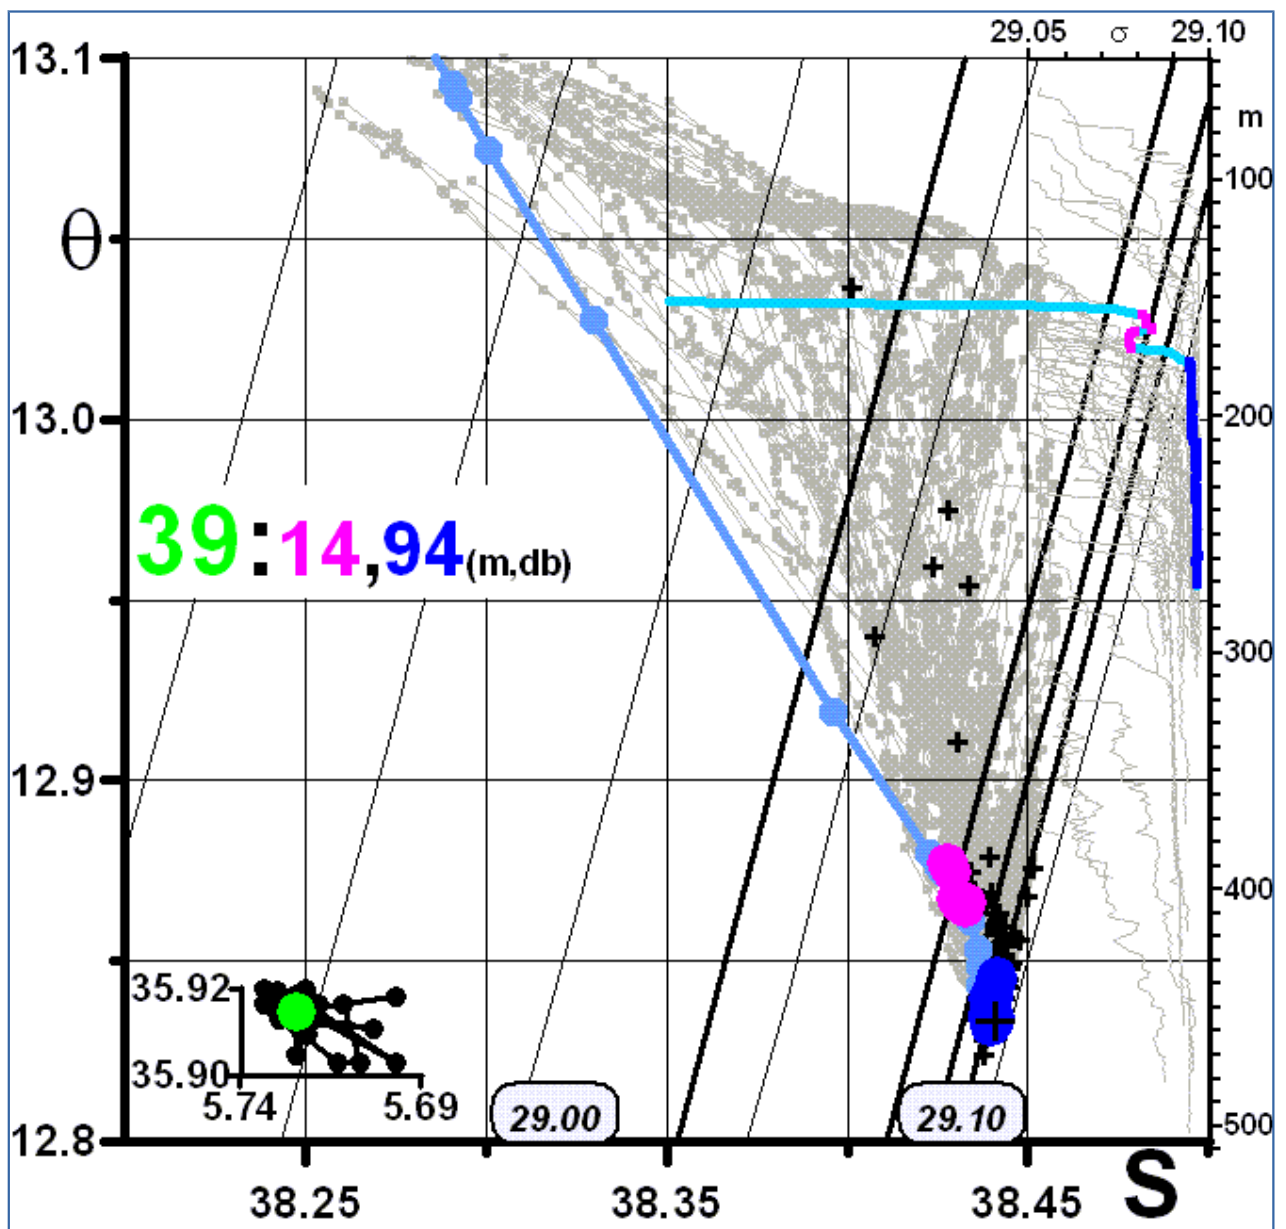

Figure S39. Same as in Fig.6a for profile #39 of the yo-yo time series at  $5^{\circ}43'W$ .

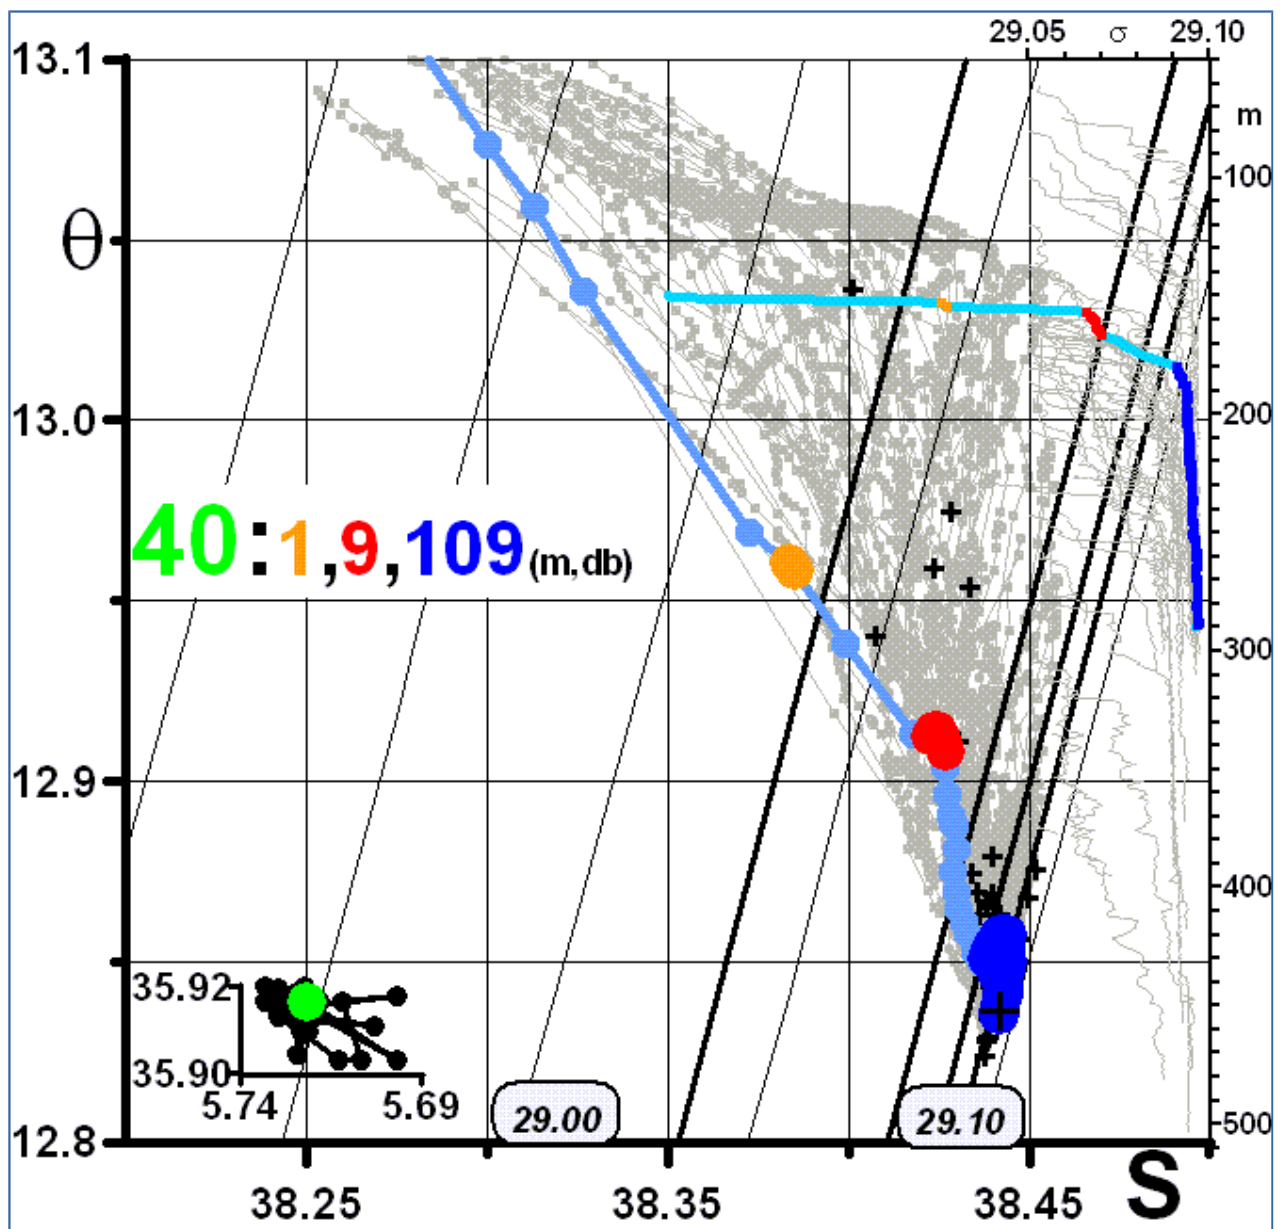

**Figure S40.** Same as in Fig.6a for profile #40 of the yo-yo time series at  $5^{\circ}43'W$ .

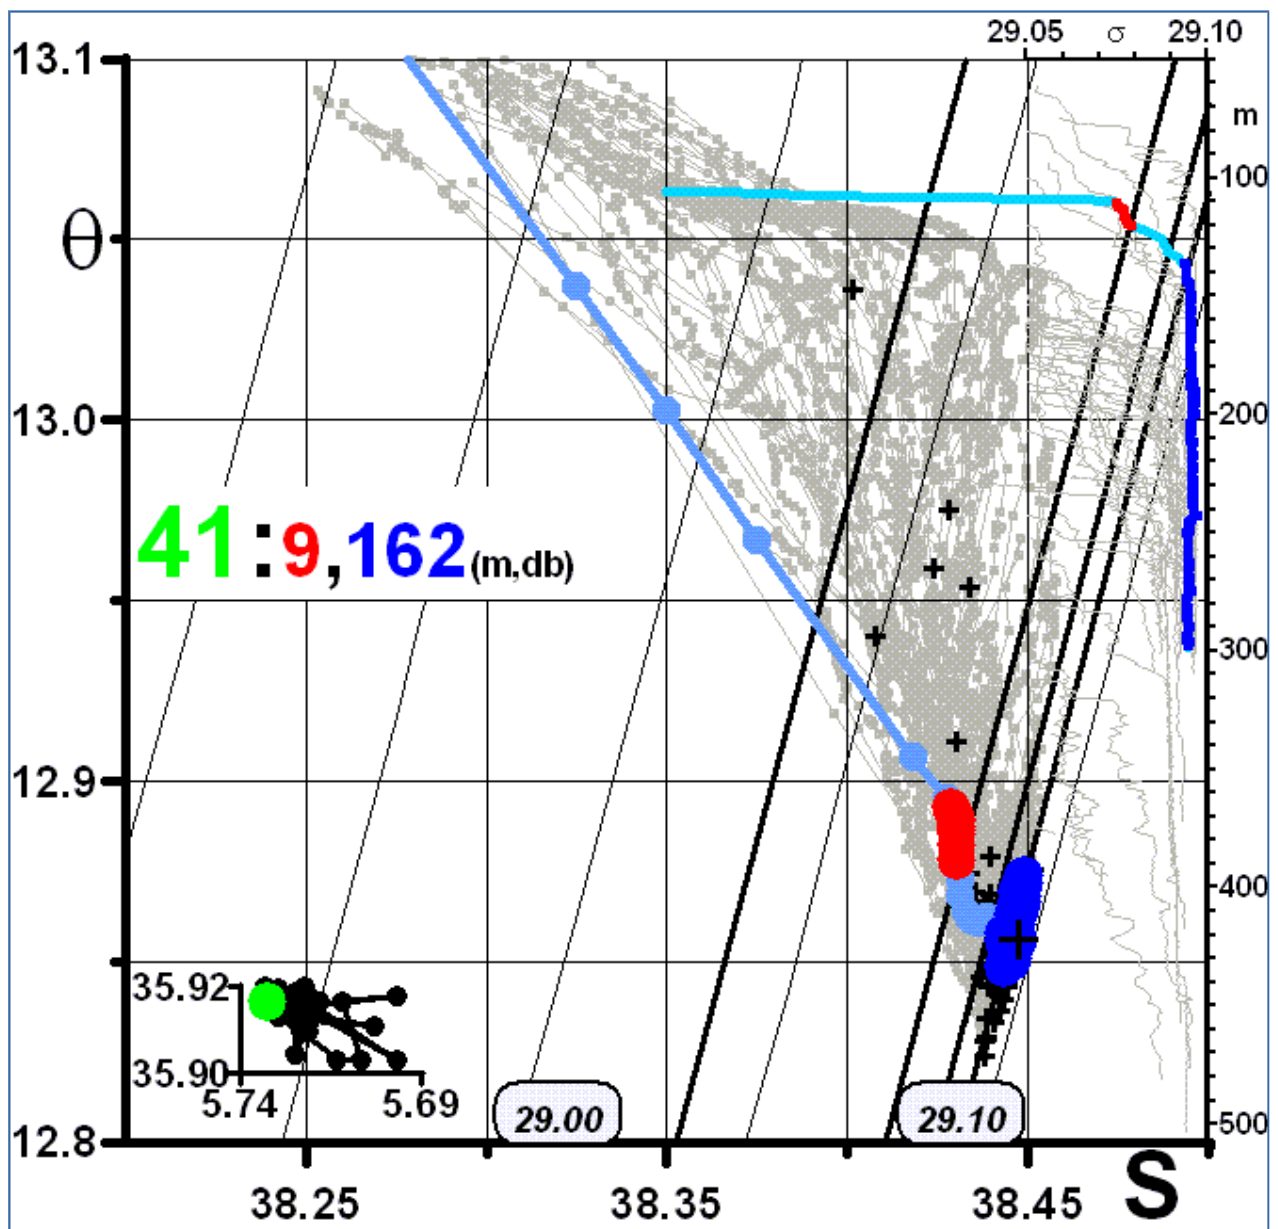

Figure S41. Same as in Fig.6a for profile #41 of the yo-yo time series at 5°43'W.

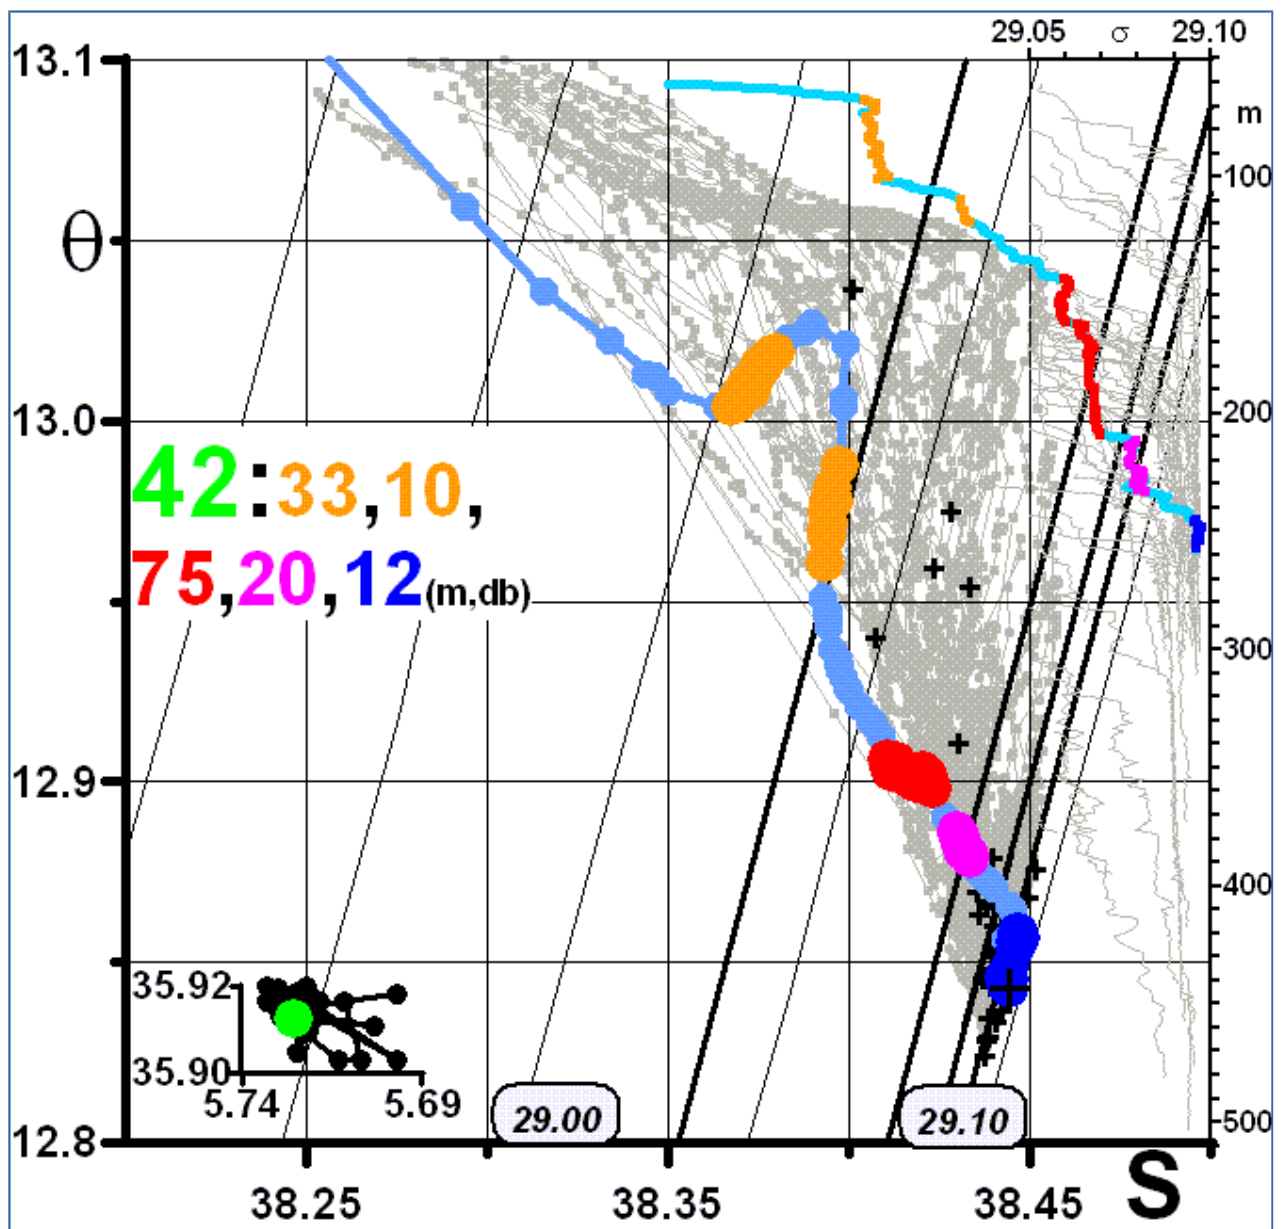

Figure S42. Same as in Fig.6a for profile #42 of the yo-yo time series at 5°43'W.

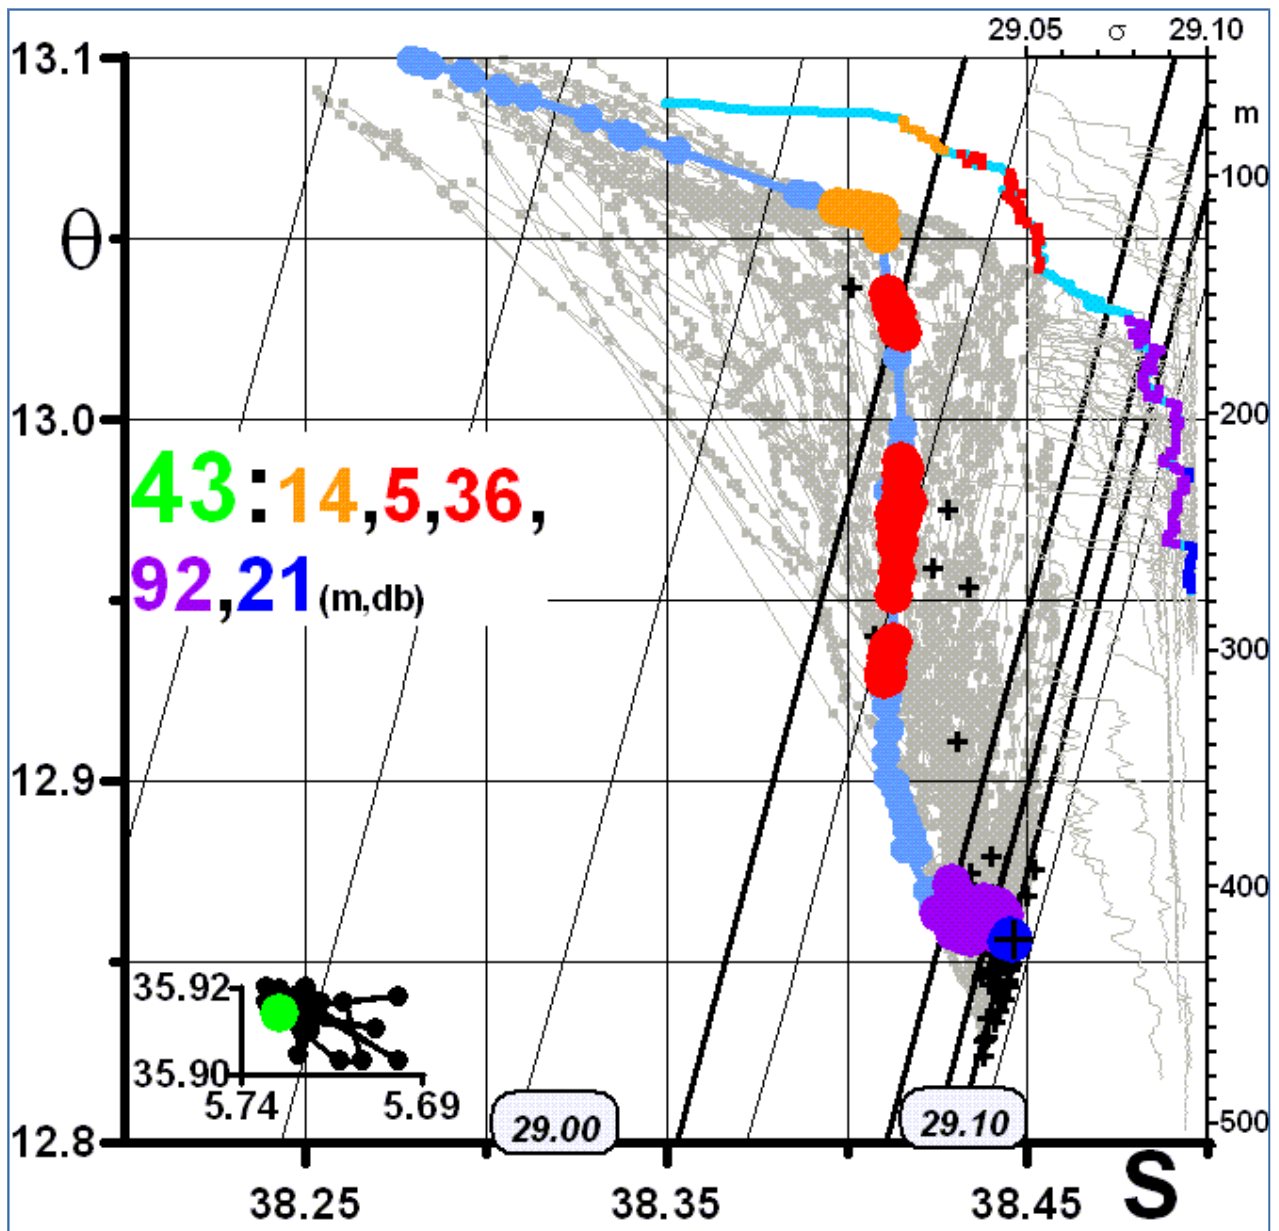

Figure S43. Same as in Fig.6a for profile #43 of the yo-yo time series at 5°43'W.

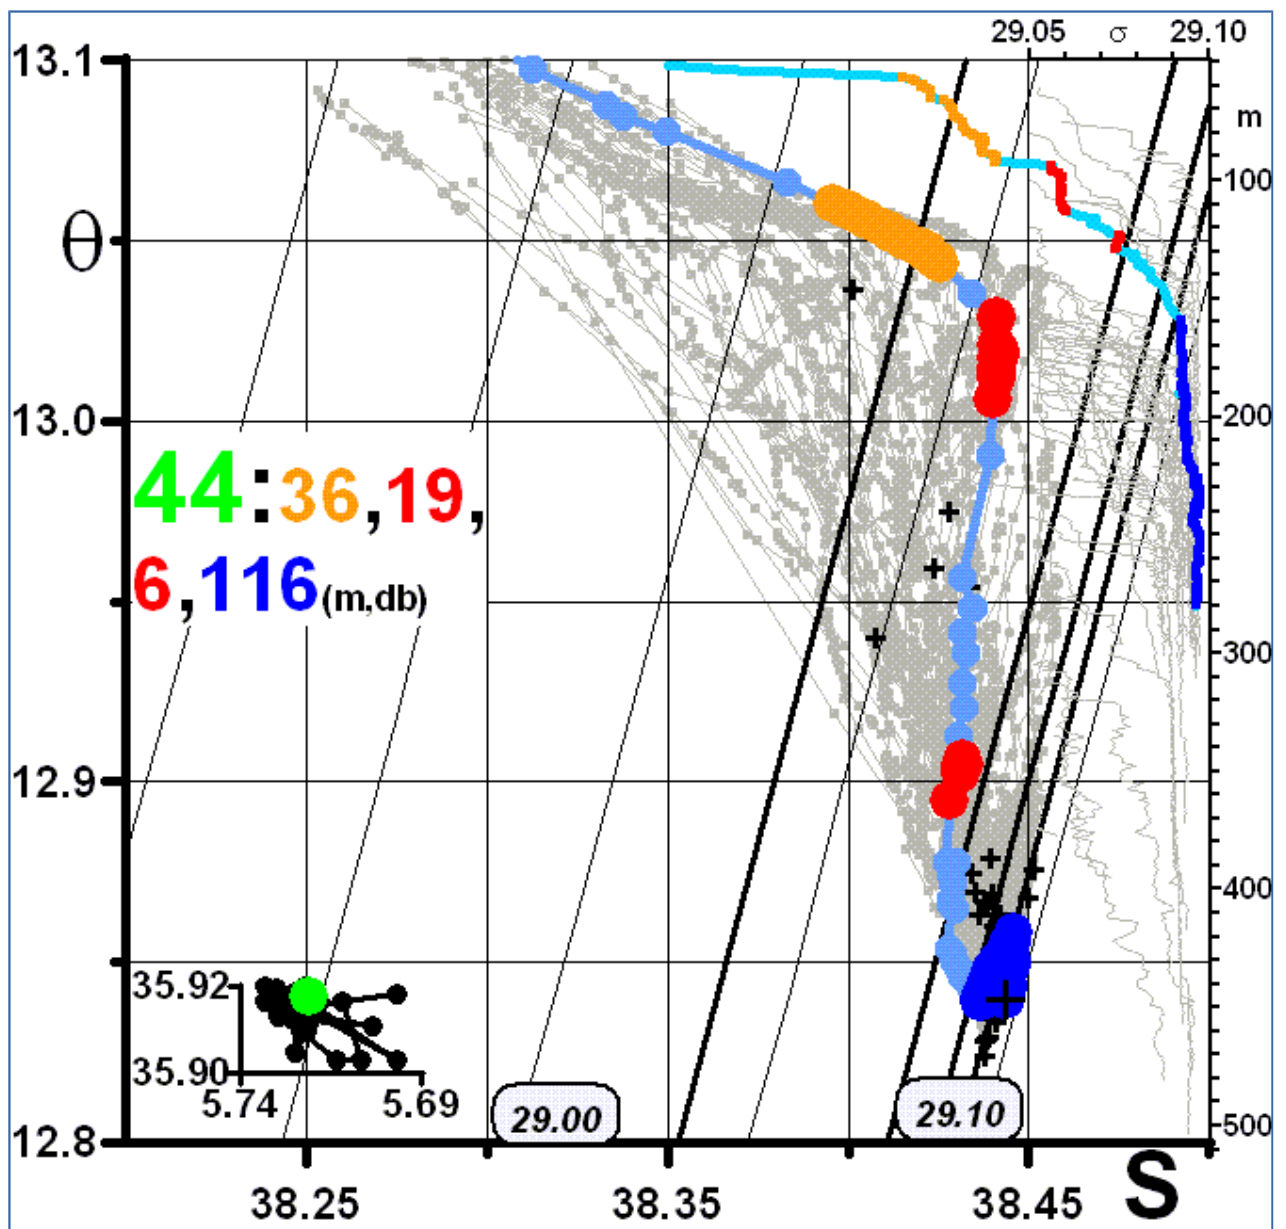

Figure S44. Same as in Fig.6a for profile #44 of the yo-yo time series at 5°43'W.

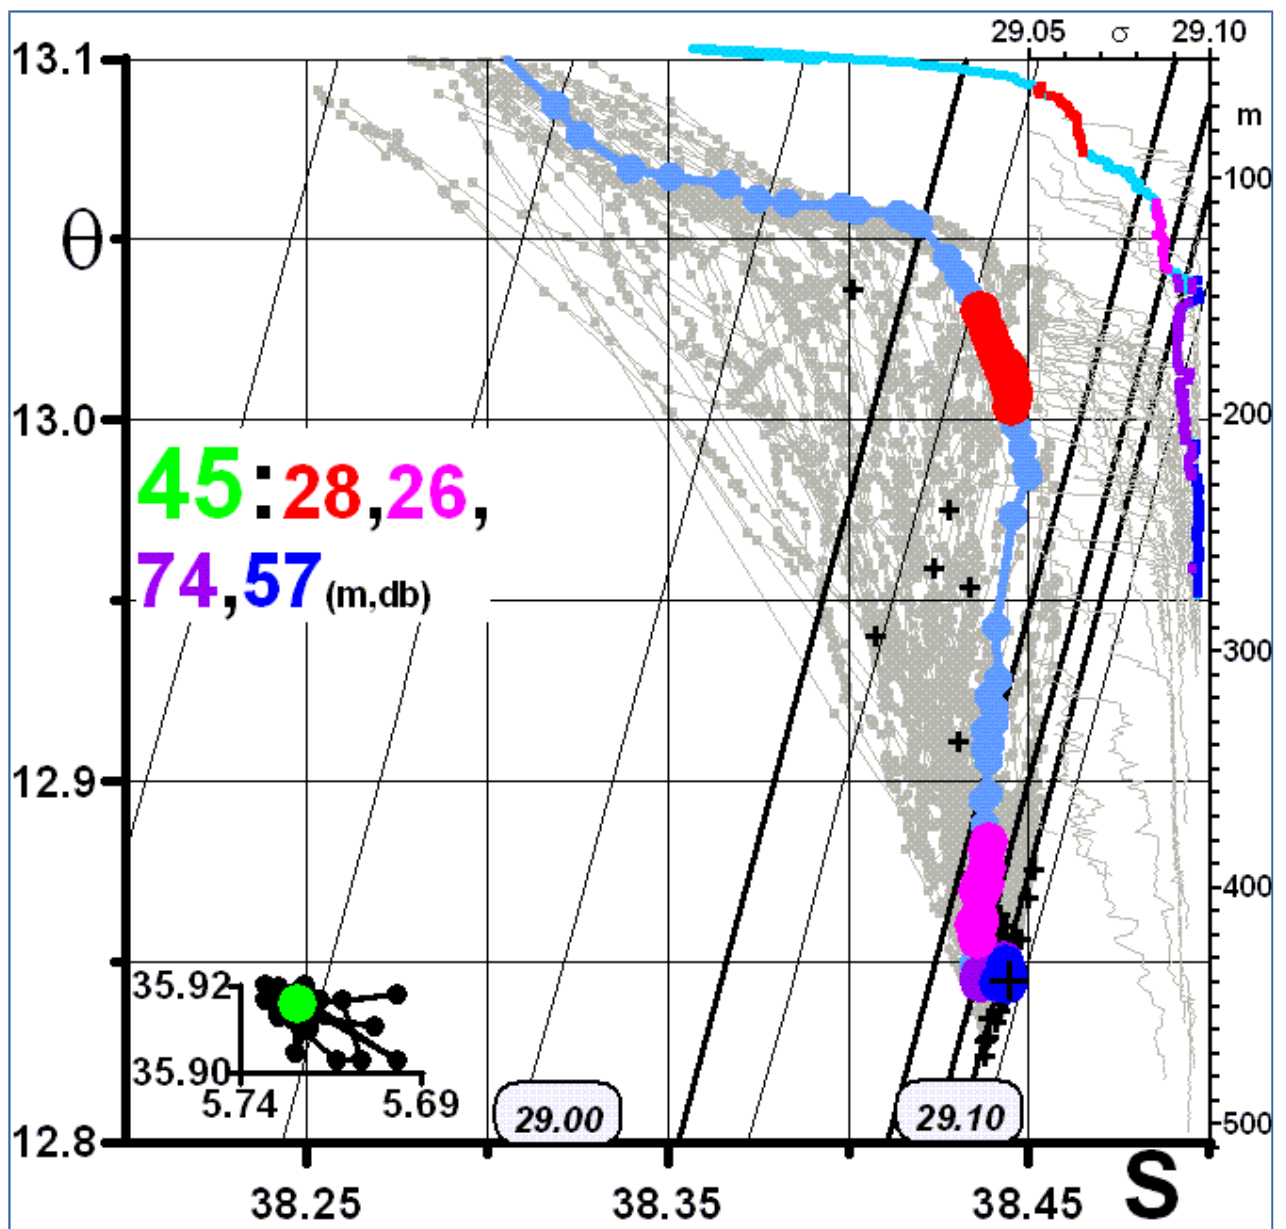

Figure S45. Same as in Fig.6a for profile #45 of the yo-yo time series at 5°43'W.

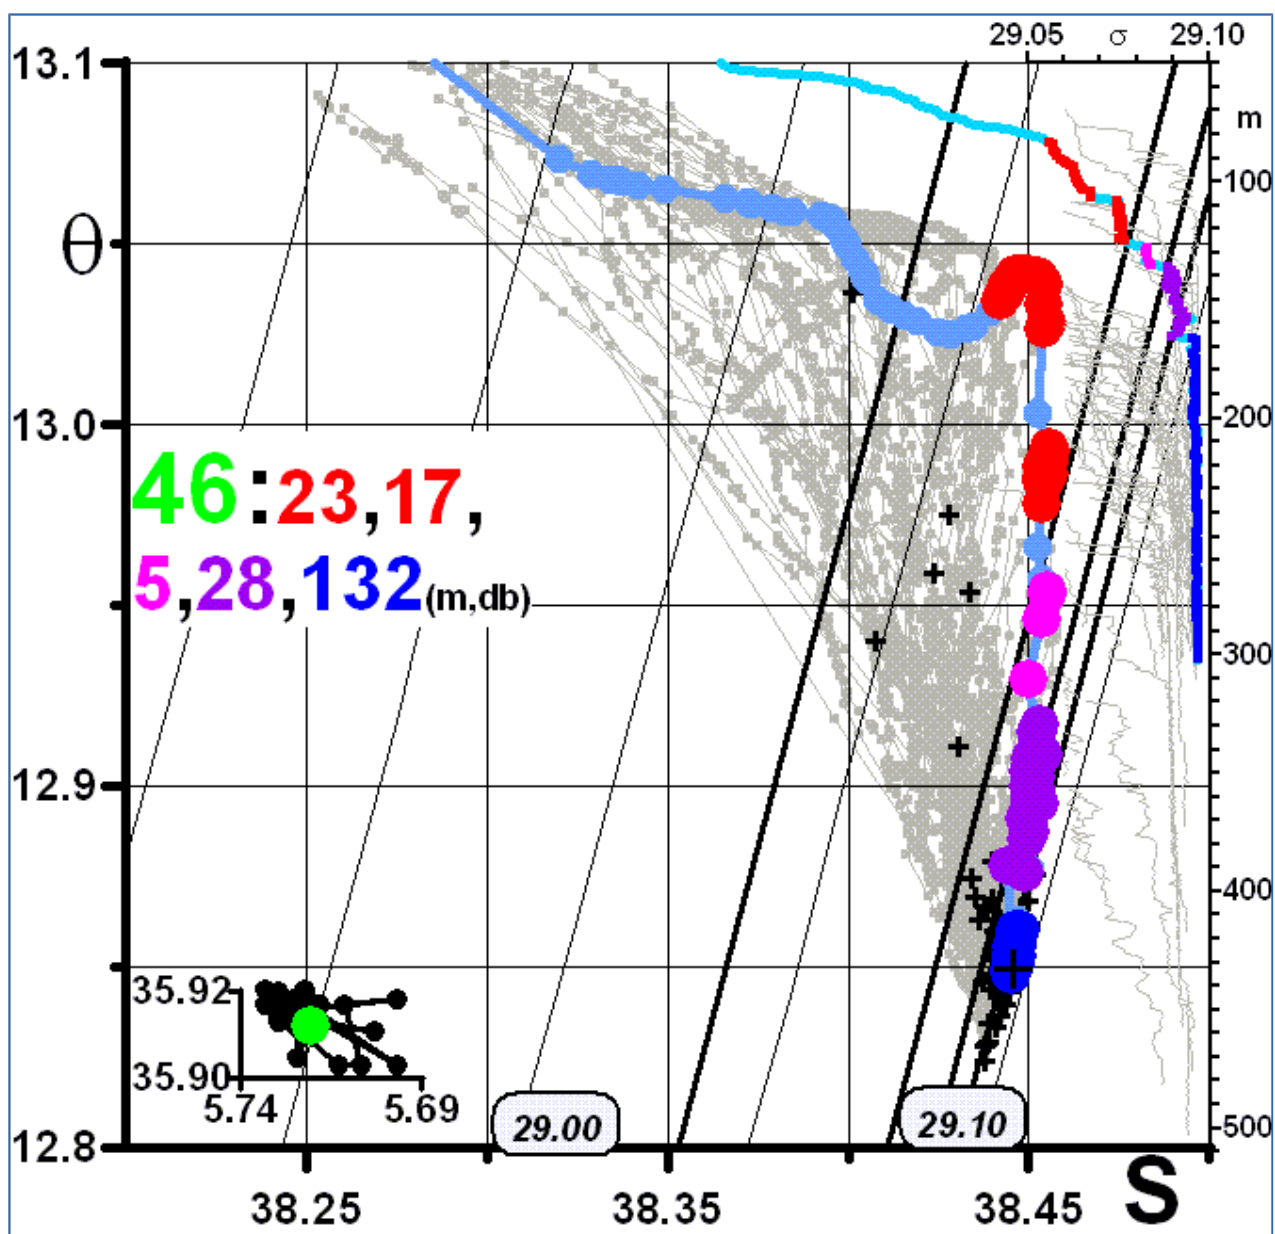

Figure S46. Same as in Fig.6a for profile #46 of the yo-yo time series at 5°43'W.

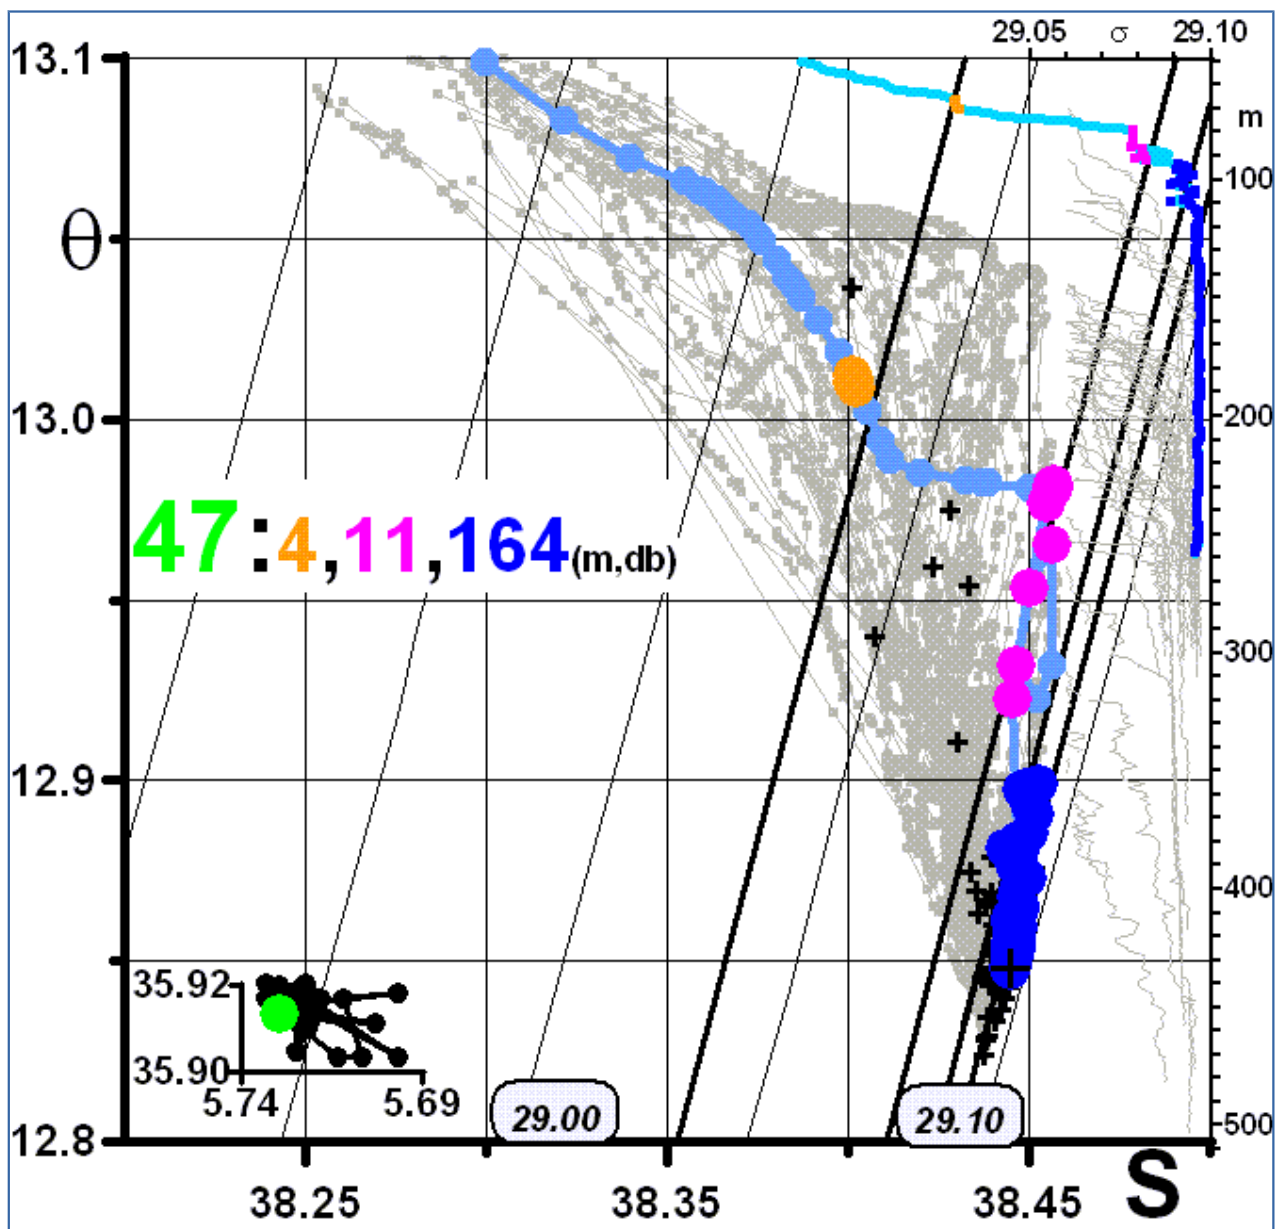

Figure S47. Same as in Fig.6a for profile #47 of the yo-yo time series at 5°43'W.

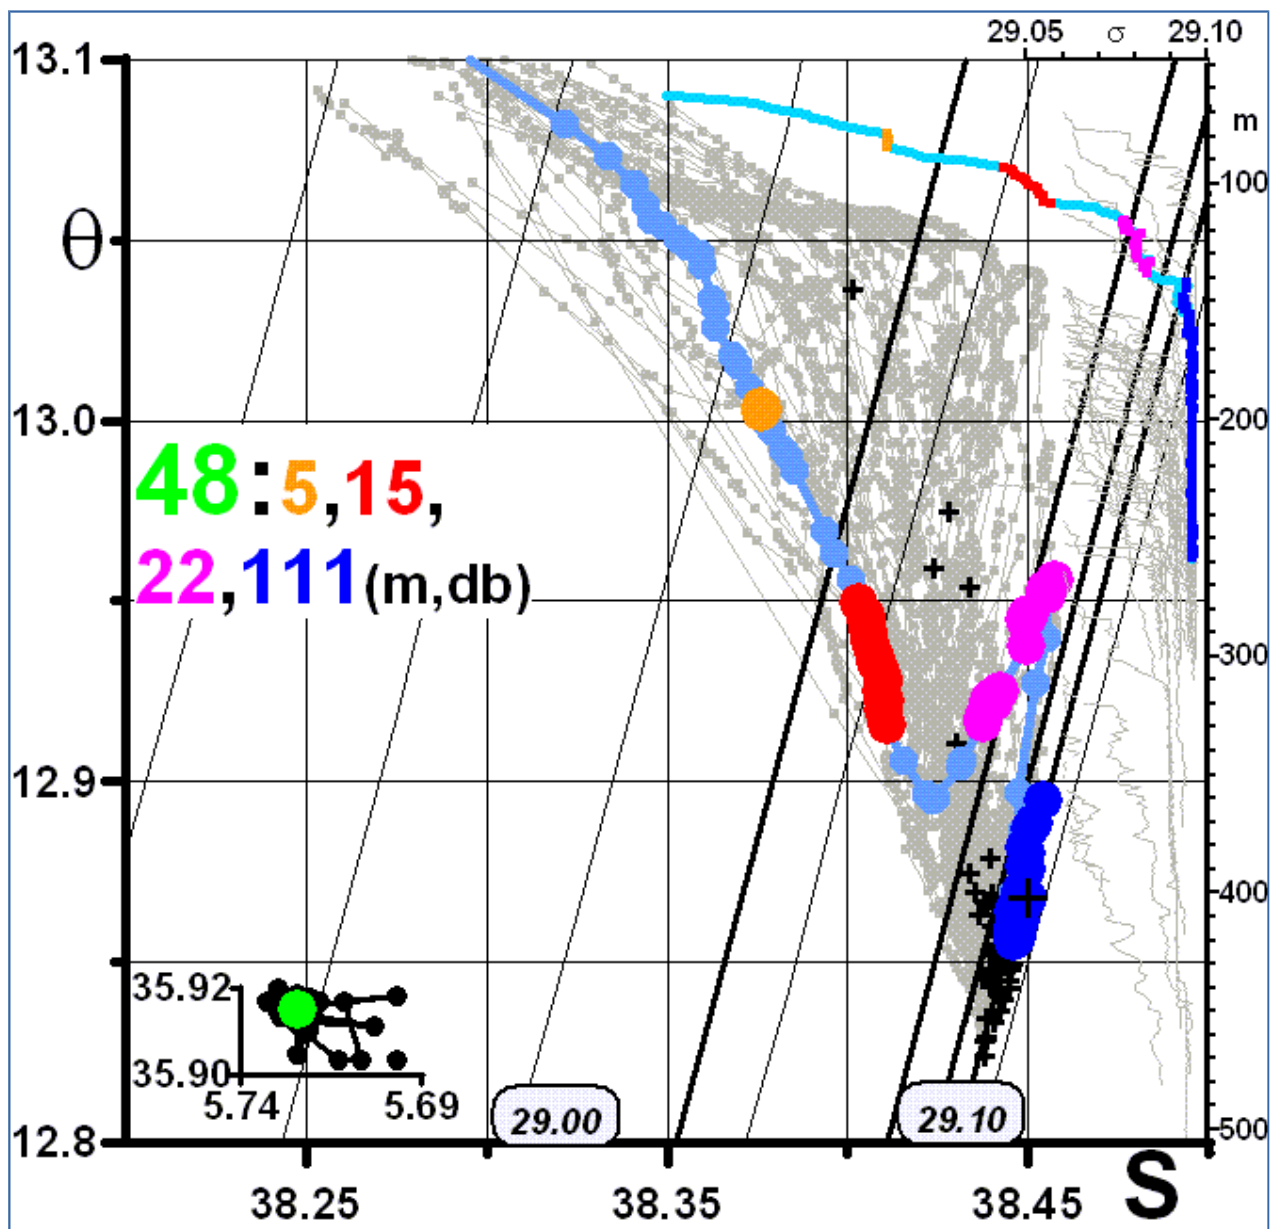

Figure S48. Same as in Fig.6a for profile #48 of the yo-yo time series at 5°43'W.

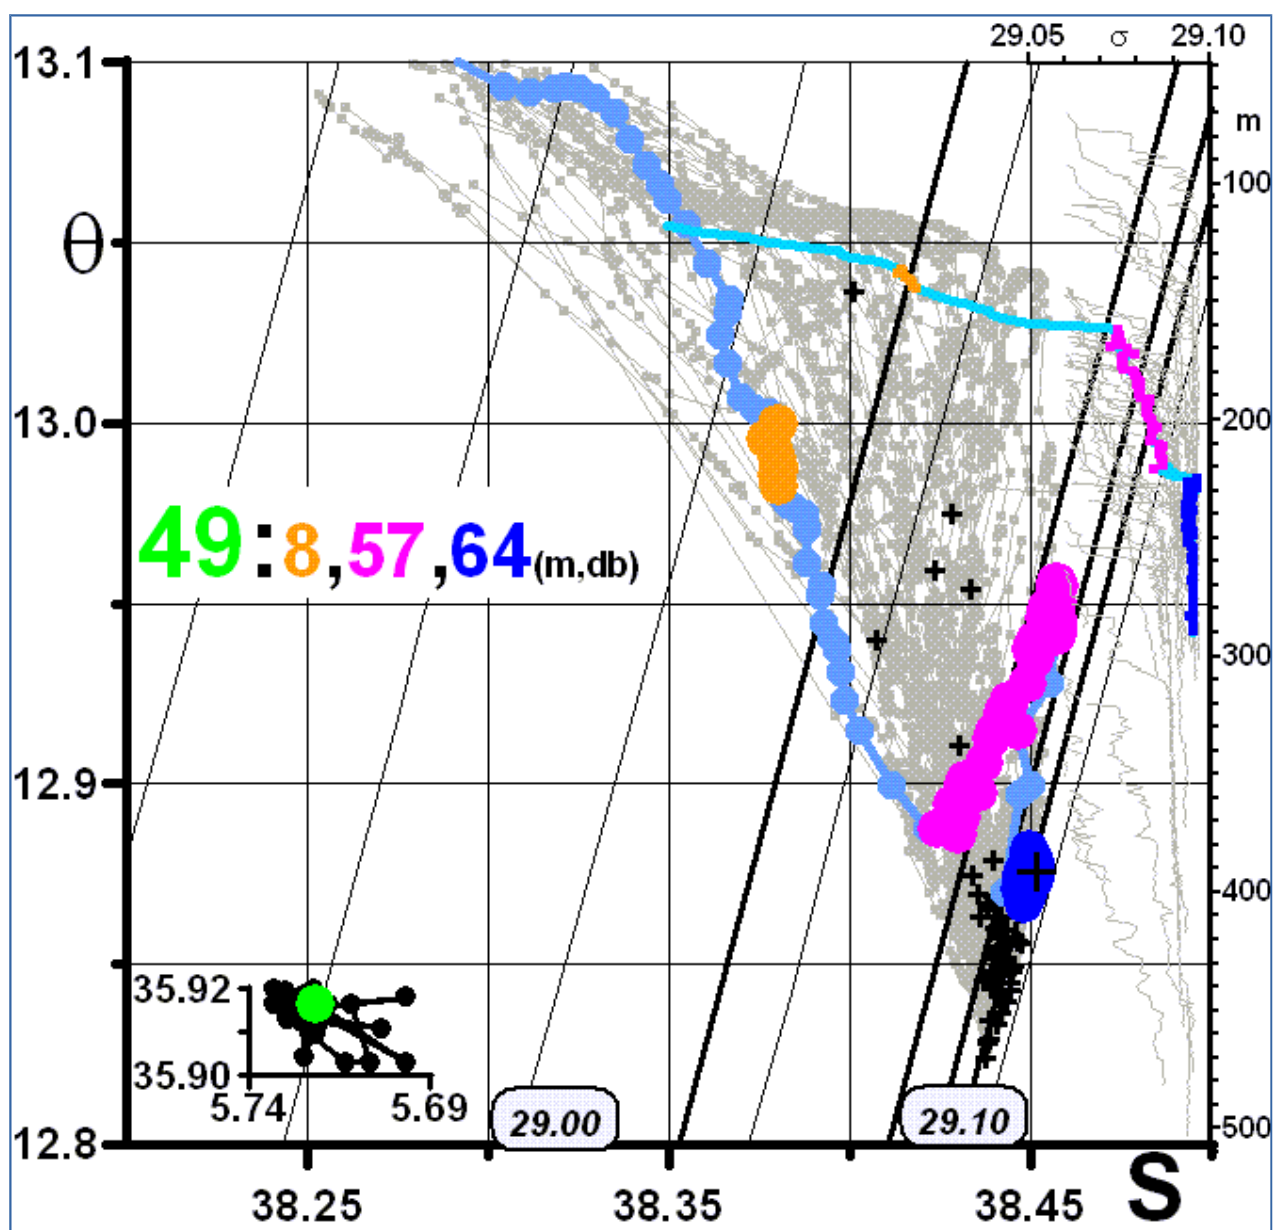

Figure S49. Same as in Fig.6a for profile #49 of the yo-yo time series at  $5^{\circ}43'W$ .
